# Supplementary material
Source: PubMed Central journal article supplement (PMC11071946)
Supplement: 18_2022_4634_MOESM2_ESM.pdf [file 18_2022_4634_MOESM2_ESM.pdf]

**Supplementary Table 1.** List of phosphopeptides measured by SRM.

| <b>Protein</b> | <b>Site</b> | <b>Peptide</b>                  |
|----------------|-------------|---------------------------------|
| ACIN1          | S243        | LSEGS(phos)QPAEEEEEDQETPSR      |
| ACLY           | S455        | TAS(phos)FSESR                  |
| AIM1           | S329        | VMPNS(phos)PQNGVLVK             |
| AKTS1          | S247        | LNTS(phos)DFQK                  |
| ANXA2          | Y24         | LSLEGDHSTPPSAY(phos)GSVK        |
| ANXA2          | Y188        | RAEDGSVIDY(phos)ELIDQDAR        |
| ARAF           | S582        | SAS(phos)EPSLHR                 |
| ATAD2          | S327        | KPNIFYSGPAS(phos)PARPR          |
| ATF2           | T69T71      | NDSVIVADQT(phos)PT(phos)PTR     |
| ATM            | S1981       | SLAFEEGS(phos)QSTTISSLSEK       |
| ATM            | S2996       | NLS(phos)DIDQSFNK               |
| ATR            | T1989       | GVELCFPENET(phos)PPEGK          |
| ATRIP          | S224        | LAAPSVSHVS(phos)PR              |
| BRAF           | S365        | SSS(phos)APNVHINTIEPVNIDDLIR    |
| BRCA1          | S1239       | VNNIPS(phos)QSTR                |
| BRCA2          | T703        | LQLFIT(phos)PEADSLSCLQEGQCENDPK |
| BRD8           | S696        | EESGTIFGS(phos)QIK              |
| CASP8          | S219        | EQDSES(phos)QTLDK               |
| CDK1           | Y15         | IGEGT(phos)YGVVYK               |
| CDN1B          | S10         | VSNGS(phos)PSLER                |
| CHD4           | S1349       | QVNYNDGS(phos)QEDR              |
| CHK1           | S317        | VTS(phos)GGVSESPSGFSK           |
| CHK1           | S280        | YSSS(phos)QPEPR                 |
| CHK2           | S379        | ILGETS(phos)LMR                 |
| CIRBP          | S146        | DYYSSRS(phos)QSGGYSDR           |
| CTNB1          | S552        | TS(phos)MGGTQQQFVEGVR           |
| DLG3           | T759        | QT(phos)YEQANK                  |
| DOT1L          | S1001S1009  | NSLPAS(phos)PAHQLSSS(phos)PR    |
| DRG2           | Y332        | Y(phos)ALVWGTSTK                |
| DYR1A          | Y321        | IYQY(phos)IQSR                  |
| EDC3           | T173        | HPNQAT(phos)PK                  |
| EFHD2          | S74         | ADLNQGIGEPQS(phos)PSR           |
| EGFR           | T693        | ELVEPLT(phos)PSGEAPNQALLR       |
| EGFR           | Y1197       | GSTAENAEY(phos)LR               |
| EI2BE          | S544        | GGs(phos)PQMDDIK                |
| EMSY           | S173        | SPRPAS(phos)PASNVVVLPSTVYVK     |
| ERBB2          | S1054       | S(phos)GGGDLTLGLEPSEEEAPR       |
| EZH2           | S362S367    | LPNNS(phos)SRPST(phos)PTINVLESK |
| F169A          | S350        | FQDSEFSSS(phos)QGEDEK           |
| F262           | S466        | RNS(phos)FTPLSSSNTIR            |
| GSK3A          | Y279        | GEPNVSY(phos)ICSR               |

|        |            |                                       |
|--------|------------|---------------------------------------|
| H2AX   | S139       | KATQAS(phos)QEY                       |
| H2AX   | T136S139   | KAT(phos)QAS(phos)QEY                 |
| HDGF   | T200       | NST(phos)PSEPGSGR                     |
| HJURP  | S642       | LPSS(phos)PLGCR                       |
| HN1L   | T76        | GSGIFDEST(phos)PVQTR                  |
| HNRPK  | S284       | DYDDMS(phos)PR                        |
| IF4B   | S422       | TGS(phos)ESSQTGTSTTSSR                |
| IF4G1  | S1231      | EAALPPVS(phos)PLK                     |
| INCENP | S263       | IAQVS(phos)PGPR                       |
| IRS1   | S1101      | HSS(phos)ETFSSTPSATR                  |
| JIP4   | S251       | VSNS(phos)PEPQK                       |
| JUND   | S73        | LAS(phos)PELER                        |
| KAPCA  | T198       | TWT(phos)LCGTPEYLAP EIILSK            |
| KAT5   | S90        | NGLPGSRPGS(phos)PER                   |
| KAT7   | S57        | LSQSSQDSS(phos)PVR                    |
| KI67   | S308       | SGGSGHAVAEPAS(phos)PEQELDQNK          |
| KS6A1  | Y220       | AYS(phos)FCGTVEYMAPEVVNR              |
| LAP2   | Y1104      | AQIPEGDY(phos)LSYR                    |
| LARP1  | S774       | SLPTTVPES(phos)PNYR                   |
| LIMA1  | S490       | ETPHS(phos)PGVEDAPIAK                 |
| LTOR5  | S26        | NPSIVGVLCTDS(phos)QGLNLGCR            |
| MAGG1  | S51        | DGFAEEAPSTS(phos)R                    |
| MCRS1  | T103       | APST(phos)PVPPSPAPAPGLTK              |
| MET    | S1016      | ATFPEDQFPNSS(phos)QNGSCR              |
| MET    | Y1235      | DMYDKEYY(phos)SVHNK                   |
| MET    | Y1234Y1235 | DMYDKEYY(phos)Y(phos)SVHNK            |
| MINT   | T1947      | ELQEAAAVPTT(phos)PR                   |
| MISP   | S394       | ALS(phos)SDSILSPAPDAR                 |
| MK03   | Y204       | IADPEHDHTGFLTEY(phos)VATR             |
| MP2K3  | T222       | T(phos)MDAGCKPYMAPER                  |
| MP2K6  | T211       | T(phos)IDAGCKPYMAPER                  |
| MRGBP  | S195       | VLANSNPSS(phos)PSAAK                  |
| MTA1   | T564       | SVSSVLSSLT(phos)PAK                   |
| MYCN   | S62        | FELLPTPLS(phos)PSR                    |
| NBN    | S343       | TTTPGPSLS(phos)QGVSVDEK               |
| NCBP1  | S22        | KTS(phos)DANETEDHLESLICK              |
| NPM    | T219       | DSKPSST(phos)PR                       |
| NSUN2  | S743       | AGEPNS(phos)PDAAEANS PDVTAGCDPAGVHPPR |
| NUMA1  | S395       | LSQLEEHL(phos)QLQDNPPQEK              |
| ODPAT  | S293       | YHGHS(phos)MSDPGVSYR                  |
| P3C2A  | S259       | VSNLQVS(phos)PK                       |
| PARN   | S557       | NNS(phos)FTAPSTVGK                    |
| PDCD4  | S457       | FVS(phos)EGDGGR                       |
| PDCD5  | Y80        | Y(phos)GQLSEK                         |

|       |          |                                      |
|-------|----------|--------------------------------------|
| PDPK1 | S241     | ANS(phos)FVGTAQYVSPELLTEK            |
| PML   | S527     | AVSPPHLDGPPS(phos)PR                 |
| PPM1G | S183     | SGGGTGEEPGS(phos)QGLNGEAGPEDSTR      |
| PRKDC | S3205    | LTPLPEDNS(phos)MNVDQDGDPSDR          |
| PTPRK | S856     | YLCEGTES(phos)PYQTGQLHPAIR           |
| PYR1  | S1859    | IHRAS(phos)DPGLPAEEPK                |
| RAD50 | S365     | LFDVCGS(phos)QDFESDLDR               |
| RB    | S807     | IPGGNIYIS(phos)PLK                   |
| RPTOR | S863     | VLDTSSLTQSAPAS(phos)PTNK             |
| RPTOR | S859S863 | VLDTSSLTQS(phos)APAS(phos)PTNK       |
| RS3   | T221     | DEILPTT(phos)PISEQK                  |
| SHC1  | Y427     | ELFDDPSY(phos)VNVQNLDK               |
| SIR1  | S47      | S(phos)PGEPGGAAPER                   |
| SMC1A | S957     | GTMDDISQEEGSS(phos)QGEDSVSGSQR       |
| SMC3  | S1083    | GSGS(phos)QSSVPSVDQFTGVGIR           |
| STAT3 | S727     | FICVTPTTCSNTIDLMS(phos)PR            |
| STAT6 | Y641     | GY(phos)VPATIK                       |
| STMN1 | S25      | ASGQAFELILS(phos)PR                  |
| STMN1 | S38      | ESVPEFPLS(phos)PPK                   |
| TERF2 | S365     | DLVLPTQALPAS(phos)PALK               |
| TFPT  | T207     | AGNALT(phos)PELAPVQIK                |
| TIF1B | S473     | S(phos)GEGEVSGLMR                    |
| TIF1B | S824     | FSAVLVEPPMSLPGAGLSS(phos)QELSGGPGDGP |
| TP53B | S831     | SGTAETEPVEQDSS(phos)QPSLPLVR         |
| TP53B | T855     | LDQELQQPQT(phos)QEK                  |
| TP53B | S1317    | TSS(phos)GTSLSAMHSSGSSGK             |
| TPR   | T2137    | TVPST(phos)PTLVVPHR                  |
| TSC2  | S939     | STS(phos)LNERPK                      |
| UIMC1 | S140     | GSHIS(phos)QGNEAEER                  |
| UT14A | S453     | DSGS(phos)QEVLSLR                    |
| WDR62 | S33      | GQSS(phos)PPPAPPICLR                 |
