# Supplementary material
Source: PubMed Central journal article supplement (PMC11071946)
Supplement: 18_2022_4634_MOESM3_ESM.pdf [file 18_2022_4634_MOESM3_ESM.pdf]

Supplementary\_Table\_2

| Supplementary table 2. SRM assays parameters |             |       |                                                                      |      |
|----------------------------------------------|-------------|-------|----------------------------------------------------------------------|------|
|                                              |             |       |                                                                      |      |
| 731.859827                                   | 854.509428  | 30.65 | sp Q9Y4K1 AIM1_HUMAN.VMPNS[Pho]PQNGVLVK.+2y8.light                   | 37.7 |
| 731.859827                                   | 515.355159  | 30.65 | sp Q9Y4K1 AIM1_HUMAN.VMPNS[Pho]PQNGVLVK.+2y5.light                   | 37.7 |
| 731.859827                                   | 458.333696  | 30.65 | sp Q9Y4K1 AIM1_HUMAN.VMPNS[Pho]PQNGVLVK.+2y4.light                   | 37.7 |
| 731.859827                                   | 359.265282  | 30.65 | sp Q9Y4K1 AIM1_HUMAN.VMPNS[Pho]PQNGVLVK.+2y3.light                   | 37.7 |
| 731.859827                                   | 616.805378  | 30.65 | sp Q9Y4K1 AIM1_HUMAN.VMPNS[Pho]PQNGVLVK.+2y11+2.light                | 37.7 |
| 735.866926                                   | 862.523627  | 30.65 | sp Q9Y4K1 AIM1_HUMAN.VMPNS[Pho]PQNGVLVK.+2y8.heavy                   | 37.7 |
| 735.866926                                   | 523.369358  | 30.65 | sp Q9Y4K1 AIM1_HUMAN.VMPNS[Pho]PQNGVLVK.+2y5.heavy                   | 37.7 |
| 735.866926                                   | 466.347895  | 30.65 | sp Q9Y4K1 AIM1_HUMAN.VMPNS[Pho]PQNGVLVK.+2y4.heavy                   | 37.7 |
| 735.866926                                   | 367.279481  | 30.65 | sp Q9Y4K1 AIM1_HUMAN.VMPNS[Pho]PQNGVLVK.+2y3.heavy                   | 37.7 |
| 735.866926                                   | 620.812477  | 30.65 | sp Q9Y4K1 AIM1_HUMAN.VMPNS[Pho]PQNGVLVK.+2y11+2.heavy                | 37.7 |
| 738.678291                                   | 1000.567337 | 36.99 | sp Q15910 EZH2_HUMAN.LPNNS[Pho]SRPST[Pho]PTINVLESK.+3y9.light        | 38.2 |
| 738.678291                                   | 689.382831  | 36.99 | sp Q15910 EZH2_HUMAN.LPNNS[Pho]SRPST[Pho]PTINVLESK.+3y6.light        | 38.2 |
| 738.678291                                   | 700.983603  | 36.99 | sp Q15910 EZH2_HUMAN.LPNNS[Pho]SRPST[Pho]PTINVLESK.+3y18+3.light     | 38.2 |
| 738.678291                                   | 668.632682  | 36.99 | sp Q15910 EZH2_HUMAN.LPNNS[Pho]SRPST[Pho]PTINVLESK.+3y17+3.light     | 38.2 |
| 738.678291                                   | 558.74532   | 36.99 | sp Q15910 EZH2_HUMAN.LPNNS[Pho]SRPST[Pho]PTINVLESK.+3b10 -98+2.light | 38.2 |
| 741.349691                                   | 1008.581536 | 36.99 | sp Q15910 EZH2_HUMAN.LPNNS[Pho]SRPST[Pho]PTINVLESK.+3y9.heavy        | 38.2 |
| 741.349691                                   | 697.39703   | 36.99 | sp Q15910 EZH2_HUMAN.LPNNS[Pho]SRPST[Pho]PTINVLESK.+3y6.heavy        | 38.2 |
| 741.349691                                   | 703.655003  | 36.99 | sp Q15910 EZH2_HUMAN.LPNNS[Pho]SRPST[Pho]PTINVLESK.+3y18+3.heavy     | 38.2 |
| 741.349691                                   | 671.304081  | 36.99 | sp Q15910 EZH2_HUMAN.LPNNS[Pho]SRPST[Pho]PTINVLESK.+3y17+3.heavy     | 38.2 |
| 741.349691                                   | 558.74532   | 36.99 | sp Q15910 EZH2_HUMAN.LPNNS[Pho]SRPST[Pho]PTINVLESK.+3b10 -98+2.heavy | 38.2 |
| 798.080585                                   | 937.498923  | 40.89 | sp Q7Z589 EMSY_HUMAN.SPRPAS[Pho]PASNVVLPSTVYVK.+3y9.light            | 41.2 |
| 798.080585                                   | 942.479349  | 40.89 | sp Q7Z589 EMSY_HUMAN.SPRPAS[Pho]PASNVVLPSTVYVK.+3y18+2.light         | 41.2 |
| 798.080585                                   | 469.2531    | 40.89 | sp Q7Z589 EMSY_HUMAN.SPRPAS[Pho]PASNVVLPSTVYVK.+3y9+2.light          | 41.2 |
| 798.080585                                   | 572.76097   | 40.89 | sp Q7Z589 EMSY_HUMAN.SPRPAS[Pho]PASNVVLPSTVYVK.+3b11+2.light         | 41.2 |
| 798.080585                                   | 622.295177  | 40.89 | sp Q7Z589 EMSY_HUMAN.SPRPAS[Pho]PASNVVLPSTVYVK.+3b12+2.light         | 41.2 |
| 800.751985                                   | 945.513122  | 40.89 | sp Q7Z589 EMSY_HUMAN.SPRPAS[Pho]PASNVVLPSTVYVK.+3y9.heavy            | 41.2 |
| 800.751985                                   | 946.486449  | 40.89 | sp Q7Z589 EMSY_HUMAN.SPRPAS[Pho]PASNVVLPSTVYVK.+3y18+2.heavy         | 41.2 |
| 800.751985                                   | 473.260199  | 40.89 | sp Q7Z589 EMSY_HUMAN.SPRPAS[Pho]PASNVVLPSTVYVK.+3y9+2.heavy          | 41.2 |
| 800.751985                                   | 572.76097   | 40.89 | sp Q7Z589 EMSY_HUMAN.SPRPAS[Pho]PASNVVLPSTVYVK.+3b11+2.heavy         | 41.2 |
| 800.751985                                   | 622.295177  | 40.89 | sp Q7Z589 EMSY_HUMAN.SPRPAS[Pho]PASNVVLPSTVYVK.+3b12+2.heavy         | 41.2 |
| 603.595791                                   | 747.810538  | 25.99 | sp Q8TEK3 DOT1L_HUMAN.NSLPAS[Pho]PAHQLSSS[Pho]PR.+3y13+2.light       | 31.3 |
| 603.595791                                   | 698.82209   | 25.99 | sp Q8TEK3 DOT1L_HUMAN.NSLPAS[Pho]PAHQLSSS[Pho]PR.+3y13 -98+2.light   | 31.3 |
| 603.595791                                   | 699.284156  | 25.99 | sp Q8TEK3 DOT1L_HUMAN.NSLPAS[Pho]PAHQLSSS[Pho]PR.+3y12+2.light       | 31.3 |
| 603.595791                                   | 498.876117  | 25.99 | sp Q8TEK3 DOT1L_HUMAN.NSLPAS[Pho]PAHQLSSS[Pho]PR.+3y13+3.light       | 31.3 |
| 603.595791                                   | 315.166296  | 25.99 | sp Q8TEK3 DOT1L_HUMAN.NSLPAS[Pho]PAHQLSSS[Pho]PR.+3b3.light          | 31.3 |
| 606.93188                                    | 752.814673  | 25.99 | sp Q8TEK3 DOT1L_HUMAN.NSLPAS[Pho]PAHQLSSS[Pho]PR.+3y13+2.heavy       | 31.3 |
| 606.93188                                    | 703.826225  | 25.99 | sp Q8TEK3 DOT1L_HUMAN.NSLPAS[Pho]PAHQLSSS[Pho]PR.+3y13 -98+2.heavy   | 31.3 |
| 606.93188                                    | 704.288291  | 25.99 | sp Q8TEK3 DOT1L_HUMAN.NSLPAS[Pho]PAHQLSSS[Pho]PR.+3y12+2.heavy       | 31.3 |
| 606.93188                                    | 502.212207  | 25.99 | sp Q8TEK3 DOT1L_HUMAN.NSLPAS[Pho]PAHQLSSS[Pho]PR.+3y13+3.heavy       | 31.3 |
| 606.93188                                    | 315.166296  | 25.99 | sp Q8TEK3 DOT1L_HUMAN.NSLPAS[Pho]PAHQLSSS[Pho]PR.+3b3.heavy          | 31.3 |
| 588.969244                                   | 683.408652  | 30.36 | sp Q96EZ8 MCRS1_HUMAN.APST[Pho]PVPPSPAPAPGLTK.+3y7.light             | 30.5 |
| 588.969244                                   | 515.318774  | 30.36 | sp Q96EZ8 MCRS1_HUMAN.APST[Pho]PVPPSPAPAPGLTK.+3y5.light             | 30.5 |
| 588.969244                                   | 426.252903  | 30.36 | sp Q96EZ8 MCRS1_HUMAN.APST[Pho]PVPPSPAPAPGLTK.+3y9+2.light           | 30.5 |
| 588.969244                                   | 342.207964  | 30.36 | sp Q96EZ8 MCRS1_HUMAN.APST[Pho]PVPPSPAPAPGLTK.+3y7+2.light           | 30.5 |
| 588.969244                                   | 633.264369  | 30.36 | sp Q96EZ8 MCRS1_HUMAN.APST[Pho]PVPPSPAPAPGLTK.+3b6.light             | 30.5 |
| 591.640643                                   | 691.422851  | 30.36 | sp Q96EZ8 MCRS1_HUMAN.APST[Pho]PVPPSPAPAPGLTK.+3y7.heavy             | 30.5 |
| 591.640643                                   | 523.332973  | 30.36 | sp Q96EZ8 MCRS1_HUMAN.APST[Pho]PVPPSPAPAPGLTK.+3y5.heavy             | 30.5 |
| 591.640643                                   | 430.260002  | 30.36 | sp Q96EZ8 MCRS1_HUMAN.APST[Pho]PVPPSPAPAPGLTK.+3y9+2.heavy           | 30.5 |
| 591.640643                                   | 346.215063  | 30.36 | sp Q96EZ8 MCRS1_HUMAN.APST[Pho]PVPPSPAPAPGLTK.+3y7+2.heavy           | 30.5 |
| 591.640643                                   | 633.264369  | 30.36 | sp Q96EZ8 MCRS1_HUMAN.APST[Pho]PVPPSPAPAPGLTK.+3b6.heavy             | 30.5 |
| 762.358703                                   | 824.354975  | 18.1  | sp Q9NV56 MRGBP_HUMAN.VLTANSNPSS[Pho]PSAAK.+2y8.light                | 39   |
| 762.358703                                   | 726.378079  | 18.1  | sp Q9NV56 MRGBP_HUMAN.VLTANSNPSS[Pho]PSAAK.+2y8 -98.light            | 39   |
| 762.358703                                   | 727.302212  | 18.1  | sp Q9NV56 MRGBP_HUMAN.VLTANSNPSS[Pho]PSAAK.+2y7.light                | 39   |
| 762.358703                                   | 473.271824  | 18.1  | sp Q9NV56 MRGBP_HUMAN.VLTANSNPSS[Pho]PSAAK.+2y5.light                | 39   |

|            |             |       |                                                            |      |
|------------|-------------|-------|------------------------------------------------------------|------|
| 762.358703 | 656.282464  | 18.1  | sp Q9NV56 MRGBP_HUMAN.VLTANSNPSS[Pho]PSAAK.+2y13+2.light   | 39   |
| 766.365802 | 832.369174  | 18.1  | sp Q9NV56 MRGBP_HUMAN.VLTANSNPSS[Pho]PSAAK.+2y8.heavy      | 39   |
| 766.365802 | 734.392278  | 18.1  | sp Q9NV56 MRGBP_HUMAN.VLTANSNPSS[Pho]PSAAK.+2y8-98.heavy   | 39   |
| 766.365802 | 735.316411  | 18.1  | sp Q9NV56 MRGBP_HUMAN.VLTANSNPSS[Pho]PSAAK.+2y7.heavy      | 39   |
| 766.365802 | 481.286023  | 18.1  | sp Q9NV56 MRGBP_HUMAN.VLTANSNPSS[Pho]PSAAK.+2y5.heavy      | 39   |
| 766.365802 | 660.289563  | 18.1  | sp Q9NV56 MRGBP_HUMAN.VLTANSNPSS[Pho]PSAAK.+2y13+2.heavy   | 39   |
| 678.344533 | 896.448876  | 39.56 | sp Q13330 MTA1_HUMAN.SVSSVLSSLT[Pho]PAK.+2y8.light         | 35.3 |
| 678.344533 | 783.364812  | 39.56 | sp Q13330 MTA1_HUMAN.SVSSVLSSLT[Pho]PAK.+2y7.light         | 35.3 |
| 678.344533 | 696.332783  | 39.56 | sp Q13330 MTA1_HUMAN.SVSSVLSSLT[Pho]PAK.+2y6.light         | 35.3 |
| 678.344533 | 398.239795  | 39.56 | sp Q13330 MTA1_HUMAN.SVSSVLSSLT[Pho]PAK.+2y4-98.light      | 35.3 |
| 678.344533 | 315.202681  | 39.56 | sp Q13330 MTA1_HUMAN.SVSSVLSSLT[Pho]PAK.+2y3.light         | 35.3 |
| 682.351632 | 904.463075  | 39.56 | sp Q13330 MTA1_HUMAN.SVSSVLSSLT[Pho]PAK.+2y8.heavy         | 35.3 |
| 682.351632 | 791.379011  | 39.56 | sp Q13330 MTA1_HUMAN.SVSSVLSSLT[Pho]PAK.+2y7.heavy         | 35.3 |
| 682.351632 | 704.346982  | 39.56 | sp Q13330 MTA1_HUMAN.SVSSVLSSLT[Pho]PAK.+2y6.heavy         | 35.3 |
| 682.351632 | 406.253994  | 39.56 | sp Q13330 MTA1_HUMAN.SVSSVLSSLT[Pho]PAK.+2y4-98.heavy      | 35.3 |
| 682.351632 | 323.21688   | 39.56 | sp Q13330 MTA1_HUMAN.SVSSVLSSLT[Pho]PAK.+2y3.heavy         | 35.3 |
| 495.260469 | 607.367455  | 32.16 | sp P12270 TPR_HUMAN.TVPST[Pho]PTLVVPHR.+3y5.light          | 25.8 |
| 495.260469 | 508.299041  | 32.16 | sp P12270 TPR_HUMAN.TVPST[Pho]PTLVVPHR.+3y4.light          | 25.8 |
| 495.260469 | 409.230627  | 32.16 | sp P12270 TPR_HUMAN.TVPST[Pho]PTLVVPHR.+3y3.light          | 25.8 |
| 495.260469 | 642.32902   | 32.16 | sp P12270 TPR_HUMAN.TVPST[Pho]PTLVVPHR.+3y11+2.light       | 25.8 |
| 495.260469 | 428.555105  | 32.16 | sp P12270 TPR_HUMAN.TVPST[Pho]PTLVVPHR.+3y11+3.light       | 25.8 |
| 498.596559 | 617.375724  | 32.16 | sp P12270 TPR_HUMAN.TVPST[Pho]PTLVVPHR.+3y5.heavy          | 25.8 |
| 498.596559 | 518.30731   | 32.16 | sp P12270 TPR_HUMAN.TVPST[Pho]PTLVVPHR.+3y4.heavy          | 25.8 |
| 498.596559 | 419.238896  | 32.16 | sp P12270 TPR_HUMAN.TVPST[Pho]PTLVVPHR.+3y3.heavy          | 25.8 |
| 498.596559 | 647.333154  | 32.16 | sp P12270 TPR_HUMAN.TVPST[Pho]PTLVVPHR.+3y11+2.heavy       | 25.8 |
| 498.596559 | 431.891195  | 32.16 | sp P12270 TPR_HUMAN.TVPST[Pho]PTLVVPHR.+3y11+3.heavy       | 25.8 |
| 603.235488 | 654.284179  | 19.6  | sp Q14011 CIRBP_HUMAN.DYSSRS[Pho]QSGGYSDR.+3y6.light       | 31.3 |
| 603.235488 | 765.304459  | 19.6  | sp Q14011 CIRBP_HUMAN.DYSSRS[Pho]QSGGYSDR.+3y13+2.light    | 31.3 |
| 603.235488 | 716.316011  | 19.6  | sp Q14011 CIRBP_HUMAN.DYSSRS[Pho]QSGGYSDR.+3y13-98+2.light | 31.3 |
| 603.235488 | 683.772794  | 19.6  | sp Q14011 CIRBP_HUMAN.DYSSRS[Pho]QSGGYSDR.+3y12+2.light    | 31.3 |
| 603.235488 | 564.893174  | 19.6  | sp Q14011 CIRBP_HUMAN.DYSSRS[Pho]QSGGYSDR.+3y14+3.light    | 31.3 |
| 606.571578 | 664.292448  | 19.6  | sp Q14011 CIRBP_HUMAN.DYSSRS[Pho]QSGGYSDR.+3y6.heavy       | 31.3 |
| 606.571578 | 770.308593  | 19.6  | sp Q14011 CIRBP_HUMAN.DYSSRS[Pho]QSGGYSDR.+3y13+2.heavy    | 31.3 |
| 606.571578 | 721.320145  | 19.6  | sp Q14011 CIRBP_HUMAN.DYSSRS[Pho]QSGGYSDR.+3y13-98+2.heavy | 31.3 |
| 606.571578 | 688.776929  | 19.6  | sp Q14011 CIRBP_HUMAN.DYSSRS[Pho]QSGGYSDR.+3y12+2.heavy    | 31.3 |
| 606.571578 | 568.229264  | 19.6  | sp Q14011 CIRBP_HUMAN.DYSSRS[Pho]QSGGYSDR.+3y14+3.heavy    | 31.3 |
| 486.718574 | 835.37096   | 2.91  | sp Q96F86 EDC3_HUMAN.HPNQAT[Pho]PK.+2y7.light              | 26.9 |
| 486.718574 | 737.394064  | 2.91  | sp Q96F86 EDC3_HUMAN.HPNQAT[Pho]PK.+2y7-98.light           | 26.9 |
| 486.718574 | 738.318196  | 2.91  | sp Q96F86 EDC3_HUMAN.HPNQAT[Pho]PK.+2y6.light              | 26.9 |
| 486.718574 | 425.179577  | 2.91  | sp Q96F86 EDC3_HUMAN.HPNQAT[Pho]PK.+2y3.light              | 26.9 |
| 486.718574 | 418.189118  | 2.91  | sp Q96F86 EDC3_HUMAN.HPNQAT[Pho]PK.+2y7+2.light            | 26.9 |
| 490.725673 | 843.385159  | 2.91  | sp Q96F86 EDC3_HUMAN.HPNQAT[Pho]PK.+2y7.heavy              | 26.9 |
| 490.725673 | 745.408263  | 2.91  | sp Q96F86 EDC3_HUMAN.HPNQAT[Pho]PK.+2y7-98.heavy           | 26.9 |
| 490.725673 | 746.332395  | 2.91  | sp Q96F86 EDC3_HUMAN.HPNQAT[Pho]PK.+2y6.heavy              | 26.9 |
| 490.725673 | 433.193776  | 2.91  | sp Q96F86 EDC3_HUMAN.HPNQAT[Pho]PK.+2y3.heavy              | 26.9 |
| 490.725673 | 422.196217  | 2.91  | sp Q96F86 EDC3_HUMAN.HPNQAT[Pho]PK.+2y7+2.heavy            | 26.9 |
| 487.256705 | 860.42207   | 13.85 | iRT_peptides.LGGNETQVR.+2y8.light                          | 26.9 |
| 487.256705 | 803.400606  | 13.85 | iRT_peptides.LGGNETQVR.+2y7.light                          | 26.9 |
| 487.256705 | 503.293622  | 13.85 | iRT_peptides.LGGNETQVR.+2y4.light                          | 26.9 |
| 547.298038 | 817.441408  | 30.97 | iRT_peptides.YILAGVESNK.+2y8.light                         | 29.6 |
| 547.298038 | 704.357344  | 30.97 | iRT_peptides.YILAGVESNK.+2y7.light                         | 29.6 |
| 547.298038 | 633.32023   | 30.97 | iRT_peptides.YILAGVESNK.+2y6.light                         | 29.6 |
| 644.822606 | 1016.525866 | 23.42 | iRT_peptides.AGGSSEPVTGLADK.+2y10.light                    | 33.9 |
| 644.822606 | 800.451245  | 23.42 | iRT_peptides.AGGSSEPVTGLADK.+2y8.light                     | 33.9 |
| 644.822606 | 604.330067  | 23.42 | iRT_peptides.AGGSSEPVTGLADK.+2y6.light                     | 33.9 |
| 669.838059 | 1041.499986 | 33.03 | iRT_peptides.TPVISGGPYER.+2y9.light                        | 35   |
| 669.838059 | 928.415922  | 33.03 | iRT_peptides.TPVISGGPYER.+2y8.light                        | 35   |

|            |             |       |                                                              |      |
|------------|-------------|-------|--------------------------------------------------------------|------|
| 669.838059 | 841.383893  | 33.03 | iRT_peptides.TPVISGGPYER.+2y7.light                          | 35   |
| 683.827888 | 819.38831   | 27.68 | iRT_peptides.VEATFGVDESANK.+2b8.light                        | 35.6 |
| 683.827888 | 966.452701  | 27.68 | iRT_peptides.VEATFGVDESANK.+2y9.light                        | 35.6 |
| 683.827888 | 663.29441   | 27.68 | iRT_peptides.VEATFGVDESANK.+2y6.light                        | 35.6 |
| 683.853709 | 1069.531286 | 34.61 | iRT_peptides.TPVITGAPYYER.+2y9.light                         | 35.6 |
| 683.853709 | 956.447222  | 34.61 | iRT_peptides.TPVITGAPYYER.+2y8.light                         | 35.6 |
| 683.853709 | 855.399543  | 34.61 | iRT_peptides.TPVITGAPYYER.+2y7.light                         | 35.6 |
| 726.835713 | 1066.484001 | 41.52 | iRT_peptides.DAVTPADFSEWSK.+2y9.light                        | 37.5 |
| 726.835713 | 584.269478  | 41.52 | iRT_peptides.DAVTPADFSEWSK.+2y10+2.light                     | 37.5 |
| 726.835713 | 533.745639  | 41.52 | iRT_peptides.DAVTPADFSEWSK.+2y9+2.light                      | 37.5 |
| 622.853512 | 826.478128  | 47.87 | iRT_peptides.TGFIDPGGVIR.+2y8.light                          | 32.9 |
| 622.853512 | 713.394064  | 47.87 | iRT_peptides.TGFIDPGGVIR.+2y7.light                          | 32.9 |
| 622.853512 | 598.367121  | 47.87 | iRT_peptides.TGFIDPGGVIR.+2y6.light                          | 32.9 |
| 636.869162 | 854.509428  | 51.07 | iRT_peptides.GTFIDPAAIVR.+2y8.light                          | 33.5 |
| 636.869162 | 741.425364  | 51.07 | iRT_peptides.GTFIDPAAIVR.+2y7.light                          | 33.5 |
| 636.869162 | 626.398421  | 51.07 | iRT_peptides.GTFIDPAAIVR.+2y6.light                          | 33.5 |
| 699.338423 | 926.473043  | 37.16 | iRT_peptides.GDLDAASYAPVR.+2y8.light                         | 36.3 |
| 699.338423 | 855.435929  | 37.16 | iRT_peptides.GDLDAASYAPVR.+2y7.light                         | 36.3 |
| 699.338423 | 605.340572  | 37.16 | iRT_peptides.GDLDAASYAPVR.+2y5.light                         | 36.3 |
| 776.929751 | 1051.557107 | 53.85 | iRT_peptides.FLLQFGAQGSPLFK.+2y10.light                      | 39.7 |
| 776.929751 | 904.488693  | 53.85 | iRT_peptides.FLLQFGAQGSPLFK.+2y9.light                       | 39.7 |
| 776.929751 | 504.318046  | 53.85 | iRT_peptides.FLLQFGAQGSPLFK.+2y4.light                       | 39.7 |
| 519.581214 | 755.423256  | 35.54 | sp O43379 WDR62_HUMAN.GQSS[Pho]PPPAPPIC[CAM]LR.+3y6.light    | 27   |
| 519.581214 | 658.370492  | 35.54 | sp O43379 WDR62_HUMAN.GQSS[Pho]PPPAPPIC[CAM]LR.+3y5.light    | 27   |
| 519.581214 | 378.215266  | 35.54 | sp O43379 WDR62_HUMAN.GQSS[Pho]PPPAPPIC[CAM]LR.+3y6+2.light  | 27   |
| 519.581214 | 802.313111  | 35.54 | sp O43379 WDR62_HUMAN.GQSS[Pho]PPPAPPIC[CAM]LR.+3b8.light    | 27   |
| 519.581214 | 704.336215  | 35.54 | sp O43379 WDR62_HUMAN.GQSS[Pho]PPPAPPIC[CAM]LR.+3b8-98.light | 27   |
| 522.917304 | 765.431525  | 35.54 | sp O43379 WDR62_HUMAN.GQSS[Pho]PPPAPPIC[CAM]LR.+3y6.heavy    | 27   |
| 522.917304 | 668.378761  | 35.54 | sp O43379 WDR62_HUMAN.GQSS[Pho]PPPAPPIC[CAM]LR.+3y5.heavy    | 27   |
| 522.917304 | 383.219401  | 35.54 | sp O43379 WDR62_HUMAN.GQSS[Pho]PPPAPPIC[CAM]LR.+3y6+2.heavy  | 27   |
| 522.917304 | 802.313111  | 35.54 | sp O43379 WDR62_HUMAN.GQSS[Pho]PPPAPPIC[CAM]LR.+3b8.heavy    | 27   |
| 522.917304 | 704.336215  | 35.54 | sp O43379 WDR62_HUMAN.GQSS[Pho]PPPAPPIC[CAM]LR.+3b8-98.heavy | 27   |
| 685.80102  | 1042.420095 | 12.79 | sp O95251 KAT7_HUMAN.LSQSSQDSS[Pho]PVR.+2y9.light            | 35.7 |
| 685.80102  | 740.297461  | 12.79 | sp O95251 KAT7_HUMAN.LSQSSQDSS[Pho]PVR.+2y6.light            | 35.7 |
| 685.80102  | 625.270517  | 12.79 | sp O95251 KAT7_HUMAN.LSQSSQDSS[Pho]PVR.+2y5.light            | 35.7 |
| 685.80102  | 371.24013   | 12.79 | sp O95251 KAT7_HUMAN.LSQSSQDSS[Pho]PVR.+2y3.light            | 35.7 |
| 685.80102  | 629.258988  | 12.79 | sp O95251 KAT7_HUMAN.LSQSSQDSS[Pho]PVR.+2y11+2.light         | 35.7 |
| 690.805155 | 1052.428364 | 12.79 | sp O95251 KAT7_HUMAN.LSQSSQDSS[Pho]PVR.+2y9.heavy            | 35.7 |
| 690.805155 | 750.30573   | 12.79 | sp O95251 KAT7_HUMAN.LSQSSQDSS[Pho]PVR.+2y6.heavy            | 35.7 |
| 690.805155 | 635.278786  | 12.79 | sp O95251 KAT7_HUMAN.LSQSSQDSS[Pho]PVR.+2y5.heavy            | 35.7 |
| 690.805155 | 381.248399  | 12.79 | sp O95251 KAT7_HUMAN.LSQSSQDSS[Pho]PVR.+2y3.heavy            | 35.7 |
| 690.805155 | 634.263123  | 12.79 | sp O95251 KAT7_HUMAN.LSQSSQDSS[Pho]PVR.+2y11+2.heavy         | 35.7 |
| 988.437878 | 929.505071  | 44.99 | sp P29353 SHC1_HUMAN.ELFDDPSY[Pho]VNVQNLDK.+2y8.light        | 49   |
| 988.437878 | 830.436657  | 44.99 | sp P29353 SHC1_HUMAN.ELFDDPSY[Pho]VNVQNLDK.+2y7.light        | 49   |
| 988.437878 | 617.325316  | 44.99 | sp P29353 SHC1_HUMAN.ELFDDPSY[Pho]VNVQNLDK.+2y5.light        | 49   |
| 988.437878 | 489.266738  | 44.99 | sp P29353 SHC1_HUMAN.ELFDDPSY[Pho]VNVQNLDK.+2y4.light        | 49   |
| 988.437878 | 678.8134    | 44.99 | sp P29353 SHC1_HUMAN.ELFDDPSY[Pho]VNVQNLDK.+2y11+2.light     | 49   |
| 992.444978 | 937.51927   | 44.99 | sp P29353 SHC1_HUMAN.ELFDDPSY[Pho]VNVQNLDK.+2y8.heavy        | 49   |
| 992.444978 | 838.450856  | 44.99 | sp P29353 SHC1_HUMAN.ELFDDPSY[Pho]VNVQNLDK.+2y7.heavy        | 49   |
| 992.444978 | 625.339515  | 44.99 | sp P29353 SHC1_HUMAN.ELFDDPSY[Pho]VNVQNLDK.+2y5.heavy        | 49   |
| 992.444978 | 497.280937  | 44.99 | sp P29353 SHC1_HUMAN.ELFDDPSY[Pho]VNVQNLDK.+2y4.heavy        | 49   |
| 992.444978 | 682.820499  | 44.99 | sp P29353 SHC1_HUMAN.ELFDDPSY[Pho]VNVQNLDK.+2y11+2.heavy     | 49   |
| 676.354703 | 800.395384  | 42.52 | sp P06400 RB_HUMAN.IPGGNIIYS[Pho]PLK.+2y6.light              | 35.3 |
| 676.354703 | 357.249632  | 42.52 | sp P06400 RB_HUMAN.IPGGNIIYS[Pho]PLK.+2y3.light              | 35.3 |
| 676.354703 | 619.812671  | 42.52 | sp P06400 RB_HUMAN.IPGGNIIYS[Pho]PLK.+2y11+2.light           | 35.3 |
| 676.354703 | 571.286289  | 42.52 | sp P06400 RB_HUMAN.IPGGNIIYS[Pho]PLK.+2y10+2.light           | 35.3 |
| 676.354703 | 439.229959  | 42.52 | sp P06400 RB_HUMAN.IPGGNIIYS[Pho]PLK.+2b5.light              | 35.3 |

|            |            |       |                                                                  |      |
|------------|------------|-------|------------------------------------------------------------------|------|
| 680.361803 | 808.409583 | 42.52 | sp P06400 RB_HUMAN.IPGGNIYIS[Pho]PLK.+2y6.heavy                  | 35.3 |
| 680.361803 | 365.263831 | 42.52 | sp P06400 RB_HUMAN.IPGGNIYIS[Pho]PLK.+2y3.heavy                  | 35.3 |
| 680.361803 | 623.819771 | 42.52 | sp P06400 RB_HUMAN.IPGGNIYIS[Pho]PLK.+2y11+2.heavy               | 35.3 |
| 680.361803 | 575.293389 | 42.52 | sp P06400 RB_HUMAN.IPGGNIYIS[Pho]PLK.+2y10+2.heavy               | 35.3 |
| 680.361803 | 439.229959 | 42.52 | sp P06400 RB_HUMAN.IPGGNIYIS[Pho]PLK.+2b5.heavy                  | 35.3 |
| 758.037217 | 799.492381 | 54.32 | sp P17612 KAPCA_HUMAN.TWT[Pho]LC[CAM]GTPEYLAPEIILSK.+3y7.light   | 39.2 |
| 758.037217 | 460.31296  | 54.32 | sp P17612 KAPCA_HUMAN.TWT[Pho]LC[CAM]GTPEYLAPEIILSK.+3y4.light   | 39.2 |
| 758.037217 | 347.228896 | 54.32 | sp P17612 KAPCA_HUMAN.TWT[Pho]LC[CAM]GTPEYLAPEIILSK.+3y3.light   | 39.2 |
| 758.037217 | 400.249829 | 54.32 | sp P17612 KAPCA_HUMAN.TWT[Pho]LC[CAM]GTPEYLAPEIILSK.+3y7+2.light | 39.2 |
| 758.037217 | 469.148277 | 54.32 | sp P17612 KAPCA_HUMAN.TWT[Pho]LC[CAM]GTPEYLAPEIILSK.+3b3.light   | 39.2 |
| 760.708617 | 807.50658  | 54.32 | sp P17612 KAPCA_HUMAN.TWT[Pho]LC[CAM]GTPEYLAPEIILSK.+3y7.heavy   | 39.2 |
| 760.708617 | 468.327159 | 54.32 | sp P17612 KAPCA_HUMAN.TWT[Pho]LC[CAM]GTPEYLAPEIILSK.+3y4.heavy   | 39.2 |
| 760.708617 | 355.243095 | 54.32 | sp P17612 KAPCA_HUMAN.TWT[Pho]LC[CAM]GTPEYLAPEIILSK.+3y3.heavy   | 39.2 |
| 760.708617 | 404.256928 | 54.32 | sp P17612 KAPCA_HUMAN.TWT[Pho]LC[CAM]GTPEYLAPEIILSK.+3y7+2.heavy | 39.2 |
| 760.708617 | 469.148277 | 54.32 | sp P17612 KAPCA_HUMAN.TWT[Pho]LC[CAM]GTPEYLAPEIILSK.+3b3.heavy   | 39.2 |
| 598.276984 | 755.30836  | 16.3  | sp P38398 BRCA1_HUMAN.VNNIPS[Pho]QSTR.+2y6.light                 | 31.8 |
| 598.276984 | 658.255596 | 16.3  | sp P38398 BRCA1_HUMAN.VNNIPS[Pho]QSTR.+2y5.light                 | 31.8 |
| 598.276984 | 378.157818 | 16.3  | sp P38398 BRCA1_HUMAN.VNNIPS[Pho]QSTR.+2y6+2.light               | 31.8 |
| 598.276984 | 328.161545 | 16.3  | sp P38398 BRCA1_HUMAN.VNNIPS[Pho]QSTR.+2b3.light                 | 31.8 |
| 598.276984 | 441.245609 | 16.3  | sp P38398 BRCA1_HUMAN.VNNIPS[Pho]QSTR.+2b4.light                 | 31.8 |
| 603.281119 | 765.316629 | 16.3  | sp P38398 BRCA1_HUMAN.VNNIPS[Pho]QSTR.+2y6.heavy                 | 31.8 |
| 603.281119 | 668.263865 | 16.3  | sp P38398 BRCA1_HUMAN.VNNIPS[Pho]QSTR.+2y5.heavy                 | 31.8 |
| 603.281119 | 383.161952 | 16.3  | sp P38398 BRCA1_HUMAN.VNNIPS[Pho]QSTR.+2y6+2.heavy               | 31.8 |
| 603.281119 | 328.161545 | 16.3  | sp P38398 BRCA1_HUMAN.VNNIPS[Pho]QSTR.+2b3.heavy                 | 31.8 |
| 603.281119 | 441.245609 | 16.3  | sp P38398 BRCA1_HUMAN.VNNIPS[Pho]QSTR.+2b4.heavy                 | 31.8 |
| 532.232045 | 738.389313 | 16.2  | sp P10398 ARAF_HUMAN.SAS[Pho]EPSLHR.+2y6.light                   | 28.9 |
| 532.232045 | 609.34672  | 16.2  | sp P10398 ARAF_HUMAN.SAS[Pho]EPSLHR.+2y5.light                   | 28.9 |
| 532.232045 | 512.293956 | 16.2  | sp P10398 ARAF_HUMAN.SAS[Pho]EPSLHR.+2y4.light                   | 28.9 |
| 532.232045 | 305.176998 | 16.2  | sp P10398 ARAF_HUMAN.SAS[Pho]EPSLHR.+2y5+2.light                 | 28.9 |
| 532.232045 | 326.074778 | 16.2  | sp P10398 ARAF_HUMAN.SAS[Pho]EPSLHR.+2b3.light                   | 28.9 |
| 537.23618  | 748.397582 | 16.2  | sp P10398 ARAF_HUMAN.SAS[Pho]EPSLHR.+2y6.heavy                   | 28.9 |
| 537.23618  | 619.354989 | 16.2  | sp P10398 ARAF_HUMAN.SAS[Pho]EPSLHR.+2y5.heavy                   | 28.9 |
| 537.23618  | 522.302225 | 16.2  | sp P10398 ARAF_HUMAN.SAS[Pho]EPSLHR.+2y4.heavy                   | 28.9 |
| 537.23618  | 310.181132 | 16.2  | sp P10398 ARAF_HUMAN.SAS[Pho]EPSLHR.+2y5+2.heavy                 | 28.9 |
| 537.23618  | 326.074778 | 16.2  | sp P10398 ARAF_HUMAN.SAS[Pho]EPSLHR.+2b3.heavy                   | 28.9 |
| 642.294456 | 985.439039 | 28.72 | sp P07355 ANXA2_HUMAN.LSLEGDHSTPPSAY[Pho]GSVK.+3y9.light         | 33.3 |
| 642.294456 | 888.386276 | 28.72 | sp P07355 ANXA2_HUMAN.LSLEGDHSTPPSAY[Pho]GSVK.+3y8.light         | 33.3 |
| 642.294456 | 906.396013 | 28.72 | sp P07355 ANXA2_HUMAN.LSLEGDHSTPPSAY[Pho]GSVK.+3y17+2.light      | 33.3 |
| 642.294456 | 862.879999 | 28.72 | sp P07355 ANXA2_HUMAN.LSLEGDHSTPPSAY[Pho]GSVK.+3y16+2.light      | 33.3 |
| 642.294456 | 493.223158 | 28.72 | sp P07355 ANXA2_HUMAN.LSLEGDHSTPPSAY[Pho]GSVK.+3y9+2.light       | 33.3 |
| 644.965855 | 993.453238 | 28.72 | sp P07355 ANXA2_HUMAN.LSLEGDHSTPPSAY[Pho]GSVK.+3y9.heavy         | 33.3 |
| 644.965855 | 896.400475 | 28.72 | sp P07355 ANXA2_HUMAN.LSLEGDHSTPPSAY[Pho]GSVK.+3y8.heavy         | 33.3 |
| 644.965855 | 910.403113 | 28.72 | sp P07355 ANXA2_HUMAN.LSLEGDHSTPPSAY[Pho]GSVK.+3y17+2.heavy      | 33.3 |
| 644.965855 | 866.887099 | 28.72 | sp P07355 ANXA2_HUMAN.LSLEGDHSTPPSAY[Pho]GSVK.+3y16+2.heavy      | 33.3 |
| 644.965855 | 497.230257 | 28.72 | sp P07355 ANXA2_HUMAN.LSLEGDHSTPPSAY[Pho]GSVK.+3y9+2.heavy       | 33.3 |
| 715.654712 | 830.436657 | 40.27 | sp P07355 ANXA2_HUMAN.RAEDGSVIDY[Pho]ELIDQDAR.+3y7.light         | 37   |
| 715.654712 | 604.268529 | 40.27 | sp P07355 ANXA2_HUMAN.RAEDGSVIDY[Pho]ELIDQDAR.+3y5.light         | 37   |
| 715.654712 | 489.241586 | 40.27 | sp P07355 ANXA2_HUMAN.RAEDGSVIDY[Pho]ELIDQDAR.+3y4.light         | 37   |
| 715.654712 | 361.183009 | 40.27 | sp P07355 ANXA2_HUMAN.RAEDGSVIDY[Pho]ELIDQDAR.+3y3.light         | 37   |
| 715.654712 | 828.421007 | 40.27 | sp P07355 ANXA2_HUMAN.RAEDGSVIDY[Pho]ELIDQDAR.+3b8.light         | 37   |
| 718.990802 | 840.444926 | 40.27 | sp P07355 ANXA2_HUMAN.RAEDGSVIDY[Pho]ELIDQDAR.+3y7.heavy         | 37   |
| 718.990802 | 614.276798 | 40.27 | sp P07355 ANXA2_HUMAN.RAEDGSVIDY[Pho]ELIDQDAR.+3y5.heavy         | 37   |
| 718.990802 | 499.249855 | 40.27 | sp P07355 ANXA2_HUMAN.RAEDGSVIDY[Pho]ELIDQDAR.+3y4.heavy         | 37   |
| 718.990802 | 371.191278 | 40.27 | sp P07355 ANXA2_HUMAN.RAEDGSVIDY[Pho]ELIDQDAR.+3y3.heavy         | 37   |
| 718.990802 | 828.421007 | 40.27 | sp P07355 ANXA2_HUMAN.RAEDGSVIDY[Pho]ELIDQDAR.+3b8.heavy         | 37   |
| 603.283747 | 778.40938  | 36.11 | sp P55039 DRG2_HUMAN.Y[Pho]ALVWGTSTK.+2y7.light                  | 32   |
| 603.283747 | 679.340966 | 36.11 | sp P55039 DRG2_HUMAN.Y[Pho]ALVWGTSTK.+2y6.light                  | 32   |

|             |             |       |                                                                     |      |
|-------------|-------------|-------|---------------------------------------------------------------------|------|
| 603.283747  | 493.261653  | 36.11 | sp P55039 DRG2_HUMAN.Y[Pho]ALVWGTSTK.+2y5.light                     | 32   |
| 603.283747  | 315.074049  | 36.11 | sp P55039 DRG2_HUMAN.Y[Pho]ALVWGTSTK.+2b2.light                     | 32   |
| 603.283747  | 428.158113  | 36.11 | sp P55039 DRG2_HUMAN.Y[Pho]ALVWGTSTK.+2b3.light                     | 32   |
| 607.290846  | 786.423579  | 36.11 | sp P55039 DRG2_HUMAN.Y[Pho]ALVWGTSTK.+2y7.heavy                     | 32   |
| 607.290846  | 687.355165  | 36.11 | sp P55039 DRG2_HUMAN.Y[Pho]ALVWGTSTK.+2y6.heavy                     | 32   |
| 607.290846  | 501.275852  | 36.11 | sp P55039 DRG2_HUMAN.Y[Pho]ALVWGTSTK.+2y5.heavy                     | 32   |
| 607.290846  | 315.074049  | 36.11 | sp P55039 DRG2_HUMAN.Y[Pho]ALVWGTSTK.+2b2.heavy                     | 32   |
| 607.290846  | 428.158113  | 36.11 | sp P55039 DRG2_HUMAN.Y[Pho]ALVWGTSTK.+2b3.heavy                     | 32   |
| 800.694513  | 456.292893  | 35.18 | sp Q15262 PTPRK_HUMAN.YLC[CAM]EGTES[Pho]PYQTGQLHPAIR.+3y4.light     | 41.3 |
| 800.694513  | 1013.475988 | 35.18 | sp Q15262 PTPRK_HUMAN.YLC[CAM]EGTES[Pho]PYQTGQLHPAIR.+3y18-98+2.lig | 41.3 |
| 800.694513  | 917.927815  | 35.18 | sp Q15262 PTPRK_HUMAN.YLC[CAM]EGTES[Pho]PYQTGQLHPAIR.+3y16+2.light  | 41.3 |
| 800.694513  | 690.872768  | 35.18 | sp Q15262 PTPRK_HUMAN.YLC[CAM]EGTES[Pho]PYQTGQLHPAIR.+3y12+2.light  | 41.3 |
| 800.694513  | 708.645383  | 35.18 | sp Q15262 PTPRK_HUMAN.YLC[CAM]EGTES[Pho]PYQTGQLHPAIR.+3y18+3.light  | 41.3 |
| 804.030603  | 466.301162  | 35.18 | sp Q15262 PTPRK_HUMAN.YLC[CAM]EGTES[Pho]PYQTGQLHPAIR.+3y4.heavy     | 41.3 |
| 804.030603  | 1018.480122 | 35.18 | sp Q15262 PTPRK_HUMAN.YLC[CAM]EGTES[Pho]PYQTGQLHPAIR.+3y18-98+2.he  | 41.3 |
| 804.030603  | 922.931949  | 35.18 | sp Q15262 PTPRK_HUMAN.YLC[CAM]EGTES[Pho]PYQTGQLHPAIR.+3y16+2.heavy  | 41.3 |
| 804.030603  | 695.876902  | 35.18 | sp Q15262 PTPRK_HUMAN.YLC[CAM]EGTES[Pho]PYQTGQLHPAIR.+3y12+2.heavy  | 41.3 |
| 804.030603  | 711.981472  | 35.18 | sp Q15262 PTPRK_HUMAN.YLC[CAM]EGTES[Pho]PYQTGQLHPAIR.+3y18+3.heavy  | 41.3 |
| 1032.099655 | 830.463147  | 30.3  | sp Q08J23 NSUN2_HUMAN.AGEPNS[Pho]PDAEEANSPDVTAGC[CAM]DPAGVHPPR      | 53.1 |
| 1032.099655 | 823.391196  | 30.3  | sp Q08J23 NSUN2_HUMAN.AGEPNS[Pho]PDAEEANSPDVTAGC[CAM]DPAGVHPPR      | 53.1 |
| 1032.099655 | 415.735211  | 30.3  | sp Q08J23 NSUN2_HUMAN.AGEPNS[Pho]PDAEEANSPDVTAGC[CAM]DPAGVHPPR      | 53.1 |
| 1032.099655 | 946.399265  | 30.3  | sp Q08J23 NSUN2_HUMAN.AGEPNS[Pho]PDAEEANSPDVTAGC[CAM]DPAGVHPPR      | 53.1 |
| 1032.099655 | 914.048344  | 30.3  | sp Q08J23 NSUN2_HUMAN.AGEPNS[Pho]PDAEEANSPDVTAGC[CAM]DPAGVHPPR      | 53.1 |
| 1035.435745 | 840.471416  | 30.3  | sp Q08J23 NSUN2_HUMAN.AGEPNS[Pho]PDAEEANSPDVTAGC[CAM]DPAGVHPPR      | 53.1 |
| 1035.435745 | 828.39533   | 30.3  | sp Q08J23 NSUN2_HUMAN.AGEPNS[Pho]PDAEEANSPDVTAGC[CAM]DPAGVHPPR      | 53.1 |
| 1035.435745 | 420.739346  | 30.3  | sp Q08J23 NSUN2_HUMAN.AGEPNS[Pho]PDAEEANSPDVTAGC[CAM]DPAGVHPPR      | 53.1 |
| 1035.435745 | 949.735355  | 30.3  | sp Q08J23 NSUN2_HUMAN.AGEPNS[Pho]PDAEEANSPDVTAGC[CAM]DPAGVHPPR      | 53.1 |
| 1035.435745 | 917.384433  | 30.3  | sp Q08J23 NSUN2_HUMAN.AGEPNS[Pho]PDAEEANSPDVTAGC[CAM]DPAGVHPPR      | 53.1 |
| 584.735149  | 786.374057  | 9.7   | sp P51858 HDGF_HUMAN.NST[Pho]PSEPGSGR.+2y8.light                    | 31.2 |
| 584.735149  | 473.246672  | 9.7   | sp P51858 HDGF_HUMAN.NST[Pho]PSEPGSGR.+2y5.light                    | 31.2 |
| 584.735149  | 435.209223  | 9.7   | sp P51858 HDGF_HUMAN.NST[Pho]PSEPGSGR.+2y9-98+2.light               | 31.2 |
| 584.735149  | 393.690666  | 9.7   | sp P51858 HDGF_HUMAN.NST[Pho]PSEPGSGR.+2y8+2.light                  | 31.2 |
| 584.735149  | 383.096241  | 9.7   | sp P51858 HDGF_HUMAN.NST[Pho]PSEPGSGR.+2b3.light                    | 31.2 |
| 589.739284  | 796.382326  | 9.7   | sp P51858 HDGF_HUMAN.NST[Pho]PSEPGSGR.+2y8.heavy                    | 31.2 |
| 589.739284  | 483.254941  | 9.7   | sp P51858 HDGF_HUMAN.NST[Pho]PSEPGSGR.+2y5.heavy                    | 31.2 |
| 589.739284  | 440.213358  | 9.7   | sp P51858 HDGF_HUMAN.NST[Pho]PSEPGSGR.+2y9-98+2.heavy               | 31.2 |
| 589.739284  | 398.694801  | 9.7   | sp P51858 HDGF_HUMAN.NST[Pho]PSEPGSGR.+2y8+2.heavy                  | 31.2 |
| 589.739284  | 383.096241  | 9.7   | sp P51858 HDGF_HUMAN.NST[Pho]PSEPGSGR.+2b3.heavy                    | 31.2 |
| 533.234254  | 966.392818  | 7.82  | sp O60271 JIP4_HUMAN.VSNS[Pho]PEPQK.+2y8.light                      | 29   |
| 533.234254  | 879.360789  | 7.82  | sp O60271 JIP4_HUMAN.VSNS[Pho]PEPQK.+2y7.light                      | 29   |
| 533.234254  | 598.319502  | 7.82  | sp O60271 JIP4_HUMAN.VSNS[Pho]PEPQK.+2y5.light                      | 29   |
| 533.234254  | 372.224145  | 7.82  | sp O60271 JIP4_HUMAN.VSNS[Pho]PEPQK.+2y3.light                      | 29   |
| 533.234254  | 694.244362  | 7.82  | sp O60271 JIP4_HUMAN.VSNS[Pho]PEPQK.+2b6.light                      | 29   |
| 537.241353  | 974.407017  | 7.82  | sp O60271 JIP4_HUMAN.VSNS[Pho]PEPQK.+2y8.heavy                      | 29   |
| 537.241353  | 887.374988  | 7.82  | sp O60271 JIP4_HUMAN.VSNS[Pho]PEPQK.+2y7.heavy                      | 29   |
| 537.241353  | 606.333701  | 7.82  | sp O60271 JIP4_HUMAN.VSNS[Pho]PEPQK.+2y5.heavy                      | 29   |
| 537.241353  | 380.238344  | 7.82  | sp O60271 JIP4_HUMAN.VSNS[Pho]PEPQK.+2y3.heavy                      | 29   |
| 537.241353  | 694.244362  | 7.82  | sp O60271 JIP4_HUMAN.VSNS[Pho]PEPQK.+2b6.heavy                      | 29   |
| 824.869966  | 1107.48303  | 24.72 | sp Q96C19 EFHD2_HUMAN.ADLNQGIGEPQS[Pho]PSR.+2y10.light              | 41.8 |
| 824.869966  | 937.377502  | 24.72 | sp Q96C19 EFHD2_HUMAN.ADLNQGIGEPQS[Pho]PSR.+2y8.light               | 41.8 |
| 824.869966  | 751.313445  | 24.72 | sp Q96C19 EFHD2_HUMAN.ADLNQGIGEPQS[Pho]PSR.+2y6.light               | 41.8 |
| 824.869966  | 653.336549  | 24.72 | sp Q96C19 EFHD2_HUMAN.ADLNQGIGEPQS[Pho]PSR.+2y6-98.light            | 41.8 |
| 824.869966  | 359.203744  | 24.72 | sp Q96C19 EFHD2_HUMAN.ADLNQGIGEPQS[Pho]PSR.+2y3.light               | 41.8 |
| 829.8741    | 1117.491299 | 24.72 | sp Q96C19 EFHD2_HUMAN.ADLNQGIGEPQS[Pho]PSR.+2y10.heavy              | 41.8 |
| 829.8741    | 947.385771  | 24.72 | sp Q96C19 EFHD2_HUMAN.ADLNQGIGEPQS[Pho]PSR.+2y8.heavy               | 41.8 |
| 829.8741    | 761.321714  | 24.72 | sp Q96C19 EFHD2_HUMAN.ADLNQGIGEPQS[Pho]PSR.+2y6.heavy               | 41.8 |
| 829.8741    | 663.344818  | 24.72 | sp Q96C19 EFHD2_HUMAN.ADLNQGIGEPQS[Pho]PSR.+2y6-98.heavy            | 41.8 |

|             |             |       |                                                                       |      |
|-------------|-------------|-------|-----------------------------------------------------------------------|------|
| 829.8741    | 369.212013  | 24.72 | sp Q96C19 EFHD2_HUMAN.ADLNQGIGEPQS[Pho]PSR.+2y3.heavy                 | 41.8 |
| 747.344827  | 619.298055  | 48.6  | sp O43504 LATOR5_HUMAN.NPSIVGVLC[CAM]TDS[Pho]QGLNLGC[CAM]R.+3y5.light | 38.6 |
| 747.344827  | 392.171064  | 48.6  | sp O43504 LATOR5_HUMAN.NPSIVGVLC[CAM]TDS[Pho]QGLNLGC[CAM]R.+3y3.light | 38.6 |
| 747.344827  | 730.786533  | 48.6  | sp O43504 LATOR5_HUMAN.NPSIVGVLC[CAM]TDS[Pho]QGLNLGC[CAM]R.+3y12+2.   | 38.6 |
| 747.344827  | 709.330518  | 48.6  | sp O43504 LATOR5_HUMAN.NPSIVGVLC[CAM]TDS[Pho]QGLNLGC[CAM]R.+3y19+3.   | 38.6 |
| 747.344827  | 667.377351  | 48.6  | sp O43504 LATOR5_HUMAN.NPSIVGVLC[CAM]TDS[Pho]QGLNLGC[CAM]R.+3b7.ligh  | 38.6 |
| 750.680917  | 629.306324  | 48.6  | sp O43504 LATOR5_HUMAN.NPSIVGVLC[CAM]TDS[Pho]QGLNLGC[CAM]R.+3y5.heav  | 38.6 |
| 750.680917  | 402.179333  | 48.6  | sp O43504 LATOR5_HUMAN.NPSIVGVLC[CAM]TDS[Pho]QGLNLGC[CAM]R.+3y3.heav  | 38.6 |
| 750.680917  | 735.790668  | 48.6  | sp O43504 LATOR5_HUMAN.NPSIVGVLC[CAM]TDS[Pho]QGLNLGC[CAM]R.+3y12+2.   | 38.6 |
| 750.680917  | 712.666608  | 48.6  | sp O43504 LATOR5_HUMAN.NPSIVGVLC[CAM]TDS[Pho]QGLNLGC[CAM]R.+3y19+3.   | 38.6 |
| 750.680917  | 667.377351  | 48.6  | sp O43504 LATOR5_HUMAN.NPSIVGVLC[CAM]TDS[Pho]QGLNLGC[CAM]R.+3b7.heav  | 38.6 |
| 673.766646  | 827.329489  | 23.22 | sp Q96MG7 MAGG1_HUMAN.DGFAEEAPSTS[Pho]R.+2y7.light                    | 35.1 |
| 673.766646  | 698.286896  | 23.22 | sp Q96MG7 MAGG1_HUMAN.DGFAEEAPSTS[Pho]R.+2y6.light                    | 35.1 |
| 673.766646  | 627.249782  | 23.22 | sp Q96MG7 MAGG1_HUMAN.DGFAEEAPSTS[Pho]R.+2y5.light                    | 35.1 |
| 673.766646  | 529.272886  | 23.22 | sp Q96MG7 MAGG1_HUMAN.DGFAEEAPSTS[Pho]R.+2y5 -98.light                | 35.1 |
| 673.766646  | 720.283511  | 23.22 | sp Q96MG7 MAGG1_HUMAN.DGFAEEAPSTS[Pho]R.+2b7.light                    | 35.1 |
| 678.770781  | 837.337758  | 23.22 | sp Q96MG7 MAGG1_HUMAN.DGFAEEAPSTS[Pho]R.+2y7.heavy                    | 35.1 |
| 678.770781  | 708.295165  | 23.22 | sp Q96MG7 MAGG1_HUMAN.DGFAEEAPSTS[Pho]R.+2y6.heavy                    | 35.1 |
| 678.770781  | 637.258051  | 23.22 | sp Q96MG7 MAGG1_HUMAN.DGFAEEAPSTS[Pho]R.+2y5.heavy                    | 35.1 |
| 678.770781  | 539.281155  | 23.22 | sp Q96MG7 MAGG1_HUMAN.DGFAEEAPSTS[Pho]R.+2y5 -98.heavy                | 35.1 |
| 678.770781  | 720.283511  | 23.22 | sp Q96MG7 MAGG1_HUMAN.DGFAEEAPSTS[Pho]R.+2b7.heavy                    | 35.1 |
| 498.538731  | 633.283845  | 12.5  | sp Q96RL1 UIMC1_HUMAN.GSHIS[Pho]QGNEAEER.+3y5.light                   | 25.9 |
| 498.538731  | 504.241252  | 12.5  | sp Q96RL1 UIMC1_HUMAN.GSHIS[Pho]QGNEAEER.+3y4.light                   | 25.9 |
| 498.538731  | 433.204138  | 12.5  | sp Q96RL1 UIMC1_HUMAN.GSHIS[Pho]QGNEAEER.+3y3.light                   | 25.9 |
| 498.538731  | 304.161545  | 12.5  | sp Q96RL1 UIMC1_HUMAN.GSHIS[Pho]QGNEAEER.+3y2.light                   | 25.9 |
| 498.538731  | 382.177726  | 12.5  | sp Q96RL1 UIMC1_HUMAN.GSHIS[Pho]QGNEAEER.+3b8 -98+2.light             | 25.9 |
| 501.874821  | 643.292114  | 12.5  | sp Q96RL1 UIMC1_HUMAN.GSHIS[Pho]QGNEAEER.+3y5.heavy                   | 25.9 |
| 501.874821  | 514.249521  | 12.5  | sp Q96RL1 UIMC1_HUMAN.GSHIS[Pho]QGNEAEER.+3y4.heavy                   | 25.9 |
| 501.874821  | 443.212407  | 12.5  | sp Q96RL1 UIMC1_HUMAN.GSHIS[Pho]QGNEAEER.+3y3.heavy                   | 25.9 |
| 501.874821  | 314.169814  | 12.5  | sp Q96RL1 UIMC1_HUMAN.GSHIS[Pho]QGNEAEER.+3y2.heavy                   | 25.9 |
| 501.874821  | 382.177726  | 12.5  | sp Q96RL1 UIMC1_HUMAN.GSHIS[Pho]QGNEAEER.+3b8 -98+2.heavy             | 25.9 |
| 702.324997  | 401.214309  | 18.2  | sp Q92993 KAT5_HUMAN.NGLPGSRPGS[Pho]PER.+2y3.light                    | 36.4 |
| 702.324997  | 645.303533  | 18.2  | sp Q92993 KAT5_HUMAN.NGLPGSRPGS[Pho]PER.+2y12+2.light                 | 36.4 |
| 702.324997  | 560.250769  | 18.2  | sp Q92993 KAT5_HUMAN.NGLPGSRPGS[Pho]PER.+2y10+2.light                 | 36.4 |
| 702.324997  | 682.363098  | 18.2  | sp Q92993 KAT5_HUMAN.NGLPGSRPGS[Pho]PER.+2b7.light                    | 36.4 |
| 702.324997  | 905.458789  | 18.2  | sp Q92993 KAT5_HUMAN.NGLPGSRPGS[Pho]PER.+2b10 -98.light               | 36.4 |
| 707.329132  | 411.222578  | 18.2  | sp Q92993 KAT5_HUMAN.NGLPGSRPGS[Pho]PER.+2y3.heavy                    | 36.4 |
| 707.329132  | 650.307668  | 18.2  | sp Q92993 KAT5_HUMAN.NGLPGSRPGS[Pho]PER.+2y12+2.heavy                 | 36.4 |
| 707.329132  | 565.254904  | 18.2  | sp Q92993 KAT5_HUMAN.NGLPGSRPGS[Pho]PER.+2y10+2.heavy                 | 36.4 |
| 707.329132  | 682.363098  | 18.2  | sp Q92993 KAT5_HUMAN.NGLPGSRPGS[Pho]PER.+2b7.heavy                    | 36.4 |
| 707.329132  | 905.458789  | 18.2  | sp Q92993 KAT5_HUMAN.NGLPGSRPGS[Pho]PER.+2b10 -98.heavy               | 36.4 |
| 997.441149  | 1213.569522 | 40.73 | sp P04626 ERBB2_HUMAN.S[Pho]GGGDLTLGLEPSEEEAPR.+2y11.light            | 49.4 |
| 997.441149  | 1156.548058 | 40.73 | sp P04626 ERBB2_HUMAN.S[Pho]GGGDLTLGLEPSEEEAPR.+2y10.light            | 49.4 |
| 997.441149  | 1043.463994 | 40.73 | sp P04626 ERBB2_HUMAN.S[Pho]GGGDLTLGLEPSEEEAPR.+2y9.light             | 49.4 |
| 997.441149  | 914.421401  | 40.73 | sp P04626 ERBB2_HUMAN.S[Pho]GGGDLTLGLEPSEEEAPR.+2y8.light             | 49.4 |
| 997.441149  | 1080.460897 | 40.73 | sp P04626 ERBB2_HUMAN.S[Pho]GGGDLTLGLEPSEEEAPR.+2b11.light            | 49.4 |
| 1002.445284 | 1223.577791 | 40.73 | sp P04626 ERBB2_HUMAN.S[Pho]GGGDLTLGLEPSEEEAPR.+2y11.heavy            | 49.4 |
| 1002.445284 | 1166.556327 | 40.73 | sp P04626 ERBB2_HUMAN.S[Pho]GGGDLTLGLEPSEEEAPR.+2y10.heavy            | 49.4 |
| 1002.445284 | 1053.472263 | 40.73 | sp P04626 ERBB2_HUMAN.S[Pho]GGGDLTLGLEPSEEEAPR.+2y9.heavy             | 49.4 |
| 1002.445284 | 924.42967   | 40.73 | sp P04626 ERBB2_HUMAN.S[Pho]GGGDLTLGLEPSEEEAPR.+2y8.heavy             | 49.4 |
| 1002.445284 | 1080.460897 | 40.73 | sp P04626 ERBB2_HUMAN.S[Pho]GGGDLTLGLEPSEEEAPR.+2b11.heavy            | 49.4 |
| 502.749874  | 692.312717  | 17.8  | sp Q9NQS7 INCE_HUMAN.IAQVS[Pho]PGPR.+2y6.light                        | 27.6 |
| 502.749874  | 594.335821  | 17.8  | sp Q9NQS7 INCE_HUMAN.IAQVS[Pho]PGPR.+2y6 -98.light                    | 27.6 |
| 502.749874  | 593.244303  | 17.8  | sp Q9NQS7 INCE_HUMAN.IAQVS[Pho]PGPR.+2y5.light                        | 27.6 |
| 502.749874  | 426.245943  | 17.8  | sp Q9NQS7 INCE_HUMAN.IAQVS[Pho]PGPR.+2y4.light                        | 27.6 |
| 502.749874  | 313.187031  | 17.8  | sp Q9NQS7 INCE_HUMAN.IAQVS[Pho]PGPR.+2b3.light                        | 27.6 |
| 507.754008  | 702.320986  | 17.8  | sp Q9NQS7 INCE_HUMAN.IAQVS[Pho]PGPR.+2y6.heavy                        | 27.6 |

|            |             |       |                                                                   |      |
|------------|-------------|-------|-------------------------------------------------------------------|------|
| 507.754008 | 604.34409   | 17.8  | sp Q9NQS7 INCE_HUMAN.IAQVS[Pho]PGPR.+2y6 -98.heavy                | 27.6 |
| 507.754008 | 603.252572  | 17.8  | sp Q9NQS7 INCE_HUMAN.IAQVS[Pho]PGPR.+2y5.heavy                    | 27.6 |
| 507.754008 | 436.254212  | 17.8  | sp Q9NQS7 INCE_HUMAN.IAQVS[Pho]PGPR.+2y4.heavy                    | 27.6 |
| 507.754008 | 313.187031  | 17.8  | sp Q9NQS7 INCE_HUMAN.IAQVS[Pho]PGPR.+2b3.heavy                    | 27.6 |
| 688.31069  | 872.427746  | 37.37 | sp Q9H0E9 BRD8_HUMAN.EESGTIFGS[Pho]QIK.+2y7.light                 | 35.8 |
| 688.31069  | 759.343682  | 37.37 | sp Q9H0E9 BRD8_HUMAN.EESGTIFGS[Pho]QIK.+2y6.light                 | 35.8 |
| 688.31069  | 661.366786  | 37.37 | sp Q9H0E9 BRD8_HUMAN.EESGTIFGS[Pho]QIK.+2y6 -98.light             | 35.8 |
| 688.31069  | 612.275268  | 37.37 | sp Q9H0E9 BRD8_HUMAN.EESGTIFGS[Pho]QIK.+2y5.light                 | 35.8 |
| 688.31069  | 514.298372  | 37.37 | sp Q9H0E9 BRD8_HUMAN.EESGTIFGS[Pho]QIK.+2y5 -98.light             | 35.8 |
| 692.317789 | 880.441945  | 37.37 | sp Q9H0E9 BRD8_HUMAN.EESGTIFGS[Pho]QIK.+2y7.heavy                 | 35.8 |
| 692.317789 | 767.357881  | 37.37 | sp Q9H0E9 BRD8_HUMAN.EESGTIFGS[Pho]QIK.+2y6.heavy                 | 35.8 |
| 692.317789 | 669.380985  | 37.37 | sp Q9H0E9 BRD8_HUMAN.EESGTIFGS[Pho]QIK.+2y6 -98.heavy             | 35.8 |
| 692.317789 | 620.289467  | 37.37 | sp Q9H0E9 BRD8_HUMAN.EESGTIFGS[Pho]QIK.+2y5.heavy                 | 35.8 |
| 692.317789 | 522.312571  | 37.37 | sp Q9H0E9 BRD8_HUMAN.EESGTIFGS[Pho]QIK.+2y5 -98.heavy             | 35.8 |
| 787.348335 | 1112.46196  | 33.56 | sp Q9H910 HN1L_HUMAN.GSGIFDEST[Pho]PVQTR.+2y9.light               | 40.1 |
| 787.348335 | 868.392424  | 33.56 | sp Q9H910 HN1L_HUMAN.GSGIFDEST[Pho]PVQTR.+2y7.light               | 40.1 |
| 787.348335 | 683.383499  | 33.56 | sp Q9H910 HN1L_HUMAN.GSGIFDEST[Pho]PVQTR.+2y6 -98.light           | 40.1 |
| 787.348335 | 600.346386  | 33.56 | sp Q9H910 HN1L_HUMAN.GSGIFDEST[Pho]PVQTR.+2y5.light               | 40.1 |
| 787.348335 | 404.225208  | 33.56 | sp Q9H910 HN1L_HUMAN.GSGIFDEST[Pho]PVQTR.+2y3.light               | 40.1 |
| 792.352469 | 1122.470229 | 33.56 | sp Q9H910 HN1L_HUMAN.GSGIFDEST[Pho]PVQTR.+2y9.heavy               | 40.1 |
| 792.352469 | 878.400693  | 33.56 | sp Q9H910 HN1L_HUMAN.GSGIFDEST[Pho]PVQTR.+2y7.heavy               | 40.1 |
| 792.352469 | 693.391768  | 33.56 | sp Q9H910 HN1L_HUMAN.GSGIFDEST[Pho]PVQTR.+2y6 -98.heavy           | 40.1 |
| 792.352469 | 610.354655  | 33.56 | sp Q9H910 HN1L_HUMAN.GSGIFDEST[Pho]PVQTR.+2y5.heavy               | 40.1 |
| 792.352469 | 414.233477  | 33.56 | sp Q9H910 HN1L_HUMAN.GSGIFDEST[Pho]PVQTR.+2y3.heavy               | 40.1 |
| 991.439961 | 1076.431314 | 50.8  | sp P51587 BRCA2_HUMAN.LQLFIT[Pho]PEADSLSC[CAM]LQEGQC[CAM]ENDPK.+3 | 51.1 |
| 991.439961 | 947.388721  | 50.8  | sp P51587 BRCA2_HUMAN.LQLFIT[Pho]PEADSLSC[CAM]LQEGQC[CAM]ENDPK.+3 | 51.1 |
| 991.439961 | 762.30868   | 50.8  | sp P51587 BRCA2_HUMAN.LQLFIT[Pho]PEADSLSC[CAM]LQEGQC[CAM]ENDPK.+3 | 51.1 |
| 991.439961 | 953.745273  | 50.8  | sp P51587 BRCA2_HUMAN.LQLFIT[Pho]PEADSLSC[CAM]LQEGQC[CAM]ENDPK.+3 | 51.1 |
| 991.439961 | 615.38646   | 50.8  | sp P51587 BRCA2_HUMAN.LQLFIT[Pho]PEADSLSC[CAM]LQEGQC[CAM]ENDPK.+3 | 51.1 |
| 994.111361 | 1084.445513 | 50.8  | sp P51587 BRCA2_HUMAN.LQLFIT[Pho]PEADSLSC[CAM]LQEGQC[CAM]ENDPK.+3 | 51.1 |
| 994.111361 | 955.40292   | 50.8  | sp P51587 BRCA2_HUMAN.LQLFIT[Pho]PEADSLSC[CAM]LQEGQC[CAM]ENDPK.+3 | 51.1 |
| 994.111361 | 770.322879  | 50.8  | sp P51587 BRCA2_HUMAN.LQLFIT[Pho]PEADSLSC[CAM]LQEGQC[CAM]ENDPK.+3 | 51.1 |
| 994.111361 | 956.416673  | 50.8  | sp P51587 BRCA2_HUMAN.LQLFIT[Pho]PEADSLSC[CAM]LQEGQC[CAM]ENDPK.+3 | 51.1 |
| 994.111361 | 615.38646   | 50.8  | sp P51587 BRCA2_HUMAN.LQLFIT[Pho]PEADSLSC[CAM]LQEGQC[CAM]ENDPK.+3 | 51.1 |
| 801.418563 | 994.593158  | 41.81 | sp P0C1Z6 TFPT_HUMAN.AGNALT[Pho]PELAPVQIK.+2y9.light              | 40.8 |
| 801.418563 | 655.413737  | 41.81 | sp P0C1Z6 TFPT_HUMAN.AGNALT[Pho]PELAPVQIK.+2y6.light              | 40.8 |
| 801.418563 | 584.376623  | 41.81 | sp P0C1Z6 TFPT_HUMAN.AGNALT[Pho]PELAPVQIK.+2y5.light              | 40.8 |
| 801.418563 | 510.267072  | 41.81 | sp P0C1Z6 TFPT_HUMAN.AGNALT[Pho]PELAPVQIK.+2b6 -98.light          | 40.8 |
| 801.418563 | 920.483607  | 41.81 | sp P0C1Z6 TFPT_HUMAN.AGNALT[Pho]PELAPVQIK.+2b10 -98.light         | 40.8 |
| 805.425663 | 1002.607357 | 41.81 | sp P0C1Z6 TFPT_HUMAN.AGNALT[Pho]PELAPVQIK.+2y9.heavy              | 40.8 |
| 805.425663 | 663.427936  | 41.81 | sp P0C1Z6 TFPT_HUMAN.AGNALT[Pho]PELAPVQIK.+2y6.heavy              | 40.8 |
| 805.425663 | 592.390822  | 41.81 | sp P0C1Z6 TFPT_HUMAN.AGNALT[Pho]PELAPVQIK.+2y5.heavy              | 40.8 |
| 805.425663 | 510.267072  | 41.81 | sp P0C1Z6 TFPT_HUMAN.AGNALT[Pho]PELAPVQIK.+2b6 -98.heavy          | 40.8 |
| 805.425663 | 920.483607  | 41.81 | sp P0C1Z6 TFPT_HUMAN.AGNALT[Pho]PELAPVQIK.+2b10 -98.heavy         | 40.8 |
| 707.949242 | 1186.430677 | 34.45 | sp P08581 MET_HUMAN.ATFPEDQFPNSS[Pho]QNGSC[CAM]R.+3y10.light      | 36.6 |
| 707.949242 | 593.24602   | 34.45 | sp P08581 MET_HUMAN.ATFPEDQFPNSS[Pho]QNGSC[CAM]R.+3y5.light       | 36.6 |
| 707.949242 | 479.203092  | 34.45 | sp P08581 MET_HUMAN.ATFPEDQFPNSS[Pho]QNGSC[CAM]R.+3y4.light       | 36.6 |
| 707.949242 | 667.253183  | 34.45 | sp P08581 MET_HUMAN.ATFPEDQFPNSS[Pho]QNGSC[CAM]R.+3y11+2.light    | 36.6 |
| 707.949242 | 593.718976  | 34.45 | sp P08581 MET_HUMAN.ATFPEDQFPNSS[Pho]QNGSC[CAM]R.+3y10+2.light    | 36.6 |
| 711.285332 | 1196.438946 | 34.45 | sp P08581 MET_HUMAN.ATFPEDQFPNSS[Pho]QNGSC[CAM]R.+3y10.heavy      | 36.6 |
| 711.285332 | 603.254289  | 34.45 | sp P08581 MET_HUMAN.ATFPEDQFPNSS[Pho]QNGSC[CAM]R.+3y5.heavy       | 36.6 |
| 711.285332 | 489.211361  | 34.45 | sp P08581 MET_HUMAN.ATFPEDQFPNSS[Pho]QNGSC[CAM]R.+3y4.heavy       | 36.6 |
| 711.285332 | 672.257318  | 34.45 | sp P08581 MET_HUMAN.ATFPEDQFPNSS[Pho]QNGSC[CAM]R.+3y11+2.heavy    | 36.6 |
| 711.285332 | 598.723111  | 34.45 | sp P08581 MET_HUMAN.ATFPEDQFPNSS[Pho]QNGSC[CAM]R.+3y10+2.heavy    | 36.6 |
| 591.239294 | 827.344745  | 23.9  | sp P08581 MET_HUMAN.DMYDKEYY[Pho]SVHMK.+3y6.light                 | 30.7 |
| 591.239294 | 398.214643  | 23.9  | sp P08581 MET_HUMAN.DMYDKEYY[Pho]SVHMK.+3y3.light                 | 30.7 |
| 591.239294 | 763.321589  | 23.9  | sp P08581 MET_HUMAN.DMYDKEYY[Pho]SVHMK.+3y11+2.light              | 30.7 |

|            |             |       |                                                           |      |
|------------|-------------|-------|-----------------------------------------------------------|------|
| 591.239294 | 681.789924  | 23.9  | sp P08581 MET_HUMAN.DMYDKEYY[Pho]SVHNK.+3y10+2.light      | 30.7 |
| 591.239294 | 624.276453  | 23.9  | sp P08581 MET_HUMAN.DMYDKEYY[Pho]SVHNK.+3y9+2.light       | 30.7 |
| 593.910693 | 835.358944  | 23.9  | sp P08581 MET_HUMAN.DMYDKEYY[Pho]SVHNK.+3y6.heavy         | 30.7 |
| 593.910693 | 406.228842  | 23.9  | sp P08581 MET_HUMAN.DMYDKEYY[Pho]SVHNK.+3y3.heavy         | 30.7 |
| 593.910693 | 767.328688  | 23.9  | sp P08581 MET_HUMAN.DMYDKEYY[Pho]SVHNK.+3y11+2.heavy      | 30.7 |
| 593.910693 | 685.797024  | 23.9  | sp P08581 MET_HUMAN.DMYDKEYY[Pho]SVHNK.+3y10+2.heavy      | 30.7 |
| 593.910693 | 628.283552  | 23.9  | sp P08581 MET_HUMAN.DMYDKEYY[Pho]SVHNK.+3y9+2.heavy       | 30.7 |
| 617.894737 | 827.344745  | 27.53 | sp P08581 MET_HUMAN.DMYDKEY[Pho]Y[Pho]SVHNK.+3y6.light    | 32   |
| 617.894737 | 584.315085  | 27.53 | sp P08581 MET_HUMAN.DMYDKEY[Pho]Y[Pho]SVHNK.+3y5.light    | 32   |
| 617.894737 | 398.214643  | 27.53 | sp P08581 MET_HUMAN.DMYDKEY[Pho]Y[Pho]SVHNK.+3y3.light    | 32   |
| 617.894737 | 721.77309   | 27.53 | sp P08581 MET_HUMAN.DMYDKEY[Pho]Y[Pho]SVHNK.+3y10+2.light | 32   |
| 617.894737 | 664.259618  | 27.53 | sp P08581 MET_HUMAN.DMYDKEY[Pho]Y[Pho]SVHNK.+3y9+2.light  | 32   |
| 620.566137 | 835.358944  | 27.53 | sp P08581 MET_HUMAN.DMYDKEY[Pho]Y[Pho]SVHNK.+3y6.heavy    | 32   |
| 620.566137 | 592.329284  | 27.53 | sp P08581 MET_HUMAN.DMYDKEY[Pho]Y[Pho]SVHNK.+3y5.heavy    | 32   |
| 620.566137 | 406.228842  | 27.53 | sp P08581 MET_HUMAN.DMYDKEY[Pho]Y[Pho]SVHNK.+3y3.heavy    | 32   |
| 620.566137 | 725.780189  | 27.53 | sp P08581 MET_HUMAN.DMYDKEY[Pho]Y[Pho]SVHNK.+3y10+2.heavy | 32   |
| 620.566137 | 668.266718  | 27.53 | sp P08581 MET_HUMAN.DMYDKEY[Pho]Y[Pho]SVHNK.+3y9+2.heavy  | 32   |
| 752.788641 | 1000.336759 | 14.3  | sp Q14839 CHD4_HUMAN.QVNYNDGS[Pho]QEDR.+2y8.light         | 38.6 |
| 752.788641 | 886.293832  | 14.3  | sp Q14839 CHD4_HUMAN.QVNYNDGS[Pho]QEDR.+2y7.light         | 38.6 |
| 752.788641 | 771.266889  | 14.3  | sp Q14839 CHD4_HUMAN.QVNYNDGS[Pho]QEDR.+2y6.light         | 38.6 |
| 752.788641 | 673.289993  | 14.3  | sp Q14839 CHD4_HUMAN.QVNYNDGS[Pho]QEDR.+2y6-98.light      | 38.6 |
| 752.788641 | 639.225146  | 14.3  | sp Q14839 CHD4_HUMAN.QVNYNDGS[Pho]QEDR.+2y10+2.light      | 38.6 |
| 757.792776 | 1010.345028 | 14.3  | sp Q14839 CHD4_HUMAN.QVNYNDGS[Pho]QEDR.+2y8.heavy         | 38.6 |
| 757.792776 | 896.302101  | 14.3  | sp Q14839 CHD4_HUMAN.QVNYNDGS[Pho]QEDR.+2y7.heavy         | 38.6 |
| 757.792776 | 781.275158  | 14.3  | sp Q14839 CHD4_HUMAN.QVNYNDGS[Pho]QEDR.+2y6.heavy         | 38.6 |
| 757.792776 | 683.298262  | 14.3  | sp Q14839 CHD4_HUMAN.QVNYNDGS[Pho]QEDR.+2y6-98.heavy      | 38.6 |
| 757.792776 | 644.22928   | 14.3  | sp Q14839 CHD4_HUMAN.QVNYNDGS[Pho]QEDR.+2y10+2.heavy      | 38.6 |
| 543.250299 | 743.393395  | 24.5  | sp Q9UHB6 LIMA1_HUMAN.ETPHS[Pho]PGVEDAPIAK.+3y7.light     | 28.2 |
| 543.250299 | 614.350802  | 24.5  | sp Q9UHB6 LIMA1_HUMAN.ETPHS[Pho]PGVEDAPIAK.+3y6.light     | 28.2 |
| 543.250299 | 499.323859  | 24.5  | sp Q9UHB6 LIMA1_HUMAN.ETPHS[Pho]PGVEDAPIAK.+3y5.light     | 28.2 |
| 543.250299 | 428.286745  | 24.5  | sp Q9UHB6 LIMA1_HUMAN.ETPHS[Pho]PGVEDAPIAK.+3y4.light     | 28.2 |
| 543.250299 | 699.326674  | 24.5  | sp Q9UHB6 LIMA1_HUMAN.ETPHS[Pho]PGVEDAPIAK.+3y13+2.light  | 28.2 |
| 545.921698 | 751.407594  | 24.5  | sp Q9UHB6 LIMA1_HUMAN.ETPHS[Pho]PGVEDAPIAK.+3y7.heavy     | 28.2 |
| 545.921698 | 622.365001  | 24.5  | sp Q9UHB6 LIMA1_HUMAN.ETPHS[Pho]PGVEDAPIAK.+3y6.heavy     | 28.2 |
| 545.921698 | 507.338058  | 24.5  | sp Q9UHB6 LIMA1_HUMAN.ETPHS[Pho]PGVEDAPIAK.+3y5.heavy     | 28.2 |
| 545.921698 | 436.300944  | 24.5  | sp Q9UHB6 LIMA1_HUMAN.ETPHS[Pho]PGVEDAPIAK.+3y4.heavy     | 28.2 |
| 545.921698 | 703.333774  | 24.5  | sp Q9UHB6 LIMA1_HUMAN.ETPHS[Pho]PGVEDAPIAK.+3y13+2.heavy  | 28.2 |
| 527.731878 | 724.302546  | 4.82  | sp P06748 NPM_HUMAN.DSKPSST[Pho]PR.+2y6.light             | 28.7 |
| 527.731878 | 627.249782  | 4.82  | sp P06748 NPM_HUMAN.DSKPSST[Pho]PR.+2y5.light             | 28.7 |
| 527.731878 | 540.217754  | 4.82  | sp P06748 NPM_HUMAN.DSKPSST[Pho]PR.+2y4.light             | 28.7 |
| 527.731878 | 362.654911  | 4.82  | sp P06748 NPM_HUMAN.DSKPSST[Pho]PR.+2y6+2.light           | 28.7 |
| 527.731878 | 331.161211  | 4.82  | sp P06748 NPM_HUMAN.DSKPSST[Pho]PR.+2b3.light             | 28.7 |
| 532.736013 | 734.310815  | 4.82  | sp P06748 NPM_HUMAN.DSKPSST[Pho]PR.+2y6.heavy             | 28.7 |
| 532.736013 | 637.258051  | 4.82  | sp P06748 NPM_HUMAN.DSKPSST[Pho]PR.+2y5.heavy             | 28.7 |
| 532.736013 | 550.226023  | 4.82  | sp P06748 NPM_HUMAN.DSKPSST[Pho]PR.+2y4.heavy             | 28.7 |
| 532.736013 | 367.659045  | 4.82  | sp P06748 NPM_HUMAN.DSKPSST[Pho]PR.+2y6+2.heavy           | 28.7 |
| 532.736013 | 331.161211  | 4.82  | sp P06748 NPM_HUMAN.DSKPSST[Pho]PR.+2b3.heavy             | 28.7 |
| 601.315047 | 817.421933  | 36.12 | sp Q04637 IF4G1_HUMAN.EAALPPVS[Pho]PLK.+2y7.light         | 32   |
| 601.315047 | 720.369169  | 36.12 | sp Q04637 IF4G1_HUMAN.EAALPPVS[Pho]PLK.+2y6.light         | 32   |
| 601.315047 | 409.214604  | 36.12 | sp Q04637 IF4G1_HUMAN.EAALPPVS[Pho]PLK.+2y7+2.light       | 32   |
| 601.315047 | 360.688222  | 36.12 | sp Q04637 IF4G1_HUMAN.EAALPPVS[Pho]PLK.+2y6+2.light       | 32   |
| 601.315047 | 385.208161  | 36.12 | sp Q04637 IF4G1_HUMAN.EAALPPVS[Pho]PLK.+2b4.light         | 32   |
| 605.322146 | 825.436132  | 36.12 | sp Q04637 IF4G1_HUMAN.EAALPPVS[Pho]PLK.+2y7.heavy         | 32   |
| 605.322146 | 728.383368  | 36.12 | sp Q04637 IF4G1_HUMAN.EAALPPVS[Pho]PLK.+2y6.heavy         | 32   |
| 605.322146 | 413.221704  | 36.12 | sp Q04637 IF4G1_HUMAN.EAALPPVS[Pho]PLK.+2y7+2.heavy       | 32   |
| 605.322146 | 364.695322  | 36.12 | sp Q04637 IF4G1_HUMAN.EAALPPVS[Pho]PLK.+2y6+2.heavy       | 32   |
| 605.322146 | 385.208161  | 36.12 | sp Q04637 IF4G1_HUMAN.EAALPPVS[Pho]PLK.+2b4.heavy         | 32   |



|            |             |       |                                                                |      |
|------------|-------------|-------|----------------------------------------------------------------|------|
| 531.218604 | 752.357344  | 6.97  | sp Q92796 DLG3_HUMAN.QT[Pho]YEQANK.+2y6.light                  | 28.9 |
| 531.218604 | 589.294016  | 6.97  | sp Q92796 DLG3_HUMAN.QT[Pho]YEQANK.+2y5.light                  | 28.9 |
| 531.218604 | 460.251423  | 6.97  | sp Q92796 DLG3_HUMAN.QT[Pho]YEQANK.+2y4.light                  | 28.9 |
| 531.218604 | 332.192845  | 6.97  | sp Q92796 DLG3_HUMAN.QT[Pho]YEQANK.+2y3.light                  | 28.9 |
| 531.218604 | 310.079863  | 6.97  | sp Q92796 DLG3_HUMAN.QT[Pho]YEQANK.+2b2.light                  | 28.9 |
| 535.225703 | 760.371543  | 6.97  | sp Q92796 DLG3_HUMAN.QT[Pho]YEQANK.+2y6.heavy                  | 28.9 |
| 535.225703 | 597.308215  | 6.97  | sp Q92796 DLG3_HUMAN.QT[Pho]YEQANK.+2y5.heavy                  | 28.9 |
| 535.225703 | 468.265622  | 6.97  | sp Q92796 DLG3_HUMAN.QT[Pho]YEQANK.+2y4.heavy                  | 28.9 |
| 535.225703 | 340.207044  | 6.97  | sp Q92796 DLG3_HUMAN.QT[Pho]YEQANK.+2y3.heavy                  | 28.9 |
| 535.225703 | 310.079863  | 6.97  | sp Q92796 DLG3_HUMAN.QT[Pho]YEQANK.+2b2.heavy                  | 28.9 |
| 452.694233 | 661.351531  | 7.73  | sp O14737 PDCD5_HUMAN.Y[Pho]GQLSEK.+2y6.light                  | 25.4 |
| 452.694233 | 476.271489  | 7.73  | sp O14737 PDCD5_HUMAN.Y[Pho]GQLSEK.+2y4.light                  | 25.4 |
| 452.694233 | 363.187425  | 7.73  | sp O14737 PDCD5_HUMAN.Y[Pho]GQLSEK.+2y3.light                  | 25.4 |
| 452.694233 | 301.058399  | 7.73  | sp O14737 PDCD5_HUMAN.Y[Pho]GQLSEK.+2b2.light                  | 25.4 |
| 452.694233 | 429.116977  | 7.73  | sp O14737 PDCD5_HUMAN.Y[Pho]GQLSEK.+2b3.light                  | 25.4 |
| 456.701333 | 669.36573   | 7.73  | sp O14737 PDCD5_HUMAN.Y[Pho]GQLSEK.+2y6.heavy                  | 25.4 |
| 456.701333 | 484.285688  | 7.73  | sp O14737 PDCD5_HUMAN.Y[Pho]GQLSEK.+2y4.heavy                  | 25.4 |
| 456.701333 | 371.201624  | 7.73  | sp O14737 PDCD5_HUMAN.Y[Pho]GQLSEK.+2y3.heavy                  | 25.4 |
| 456.701333 | 301.058399  | 7.73  | sp O14737 PDCD5_HUMAN.Y[Pho]GQLSEK.+2b2.heavy                  | 25.4 |
| 456.701333 | 429.116977  | 7.73  | sp O14737 PDCD5_HUMAN.Y[Pho]GQLSEK.+2b3.heavy                  | 25.4 |
| 613.308482 | 806.885222  | 30.39 | sp Q6PL18 ATAD2_HUMAN.KPNIFYSGPAS[Pho]PARPR.+3y14+2.light      | 31.8 |
| 613.308482 | 757.896774  | 30.39 | sp Q6PL18 ATAD2_HUMAN.KPNIFYSGPAS[Pho]PARPR.+3y14 -98+2.light  | 31.8 |
| 613.308482 | 644.333278  | 30.39 | sp Q6PL18 ATAD2_HUMAN.KPNIFYSGPAS[Pho]PARPR.+3y12 -98+2.light  | 31.8 |
| 613.308482 | 538.25924   | 30.39 | sp Q6PL18 ATAD2_HUMAN.KPNIFYSGPAS[Pho]PARPR.+3y14+3.light      | 31.8 |
| 613.308482 | 783.876865  | 30.39 | sp Q6PL18 ATAD2_HUMAN.KPNIFYSGPAS[Pho]PARPR.+3b14+2.light      | 31.8 |
| 616.644572 | 811.889356  | 30.39 | sp Q6PL18 ATAD2_HUMAN.KPNIFYSGPAS[Pho]PARPR.+3y14+2.heavy      | 31.8 |
| 616.644572 | 762.900908  | 30.39 | sp Q6PL18 ATAD2_HUMAN.KPNIFYSGPAS[Pho]PARPR.+3y14 -98+2.heavy  | 31.8 |
| 616.644572 | 649.337413  | 30.39 | sp Q6PL18 ATAD2_HUMAN.KPNIFYSGPAS[Pho]PARPR.+3y12 -98+2.heavy  | 31.8 |
| 616.644572 | 541.59533   | 30.39 | sp Q6PL18 ATAD2_HUMAN.KPNIFYSGPAS[Pho]PARPR.+3y14+3.heavy      | 31.8 |
| 616.644572 | 783.876865  | 30.39 | sp Q6PL18 ATAD2_HUMAN.KPNIFYSGPAS[Pho]PARPR.+3b14+2.heavy      | 31.8 |
| 746.329414 | 1179.471796 | 34.24 | sp Q96RT1 LAP2_HUMAN.AQIPEGDY[Pho]LSYR.+2y9.light              | 38.3 |
| 746.329414 | 953.376439  | 34.24 | sp Q96RT1 LAP2_HUMAN.AQIPEGDY[Pho]LSYR.+2y7.light              | 38.3 |
| 746.329414 | 646.781568  | 34.24 | sp Q96RT1 LAP2_HUMAN.AQIPEGDY[Pho]LSYR.+2y10+2.light           | 38.3 |
| 746.329414 | 590.239536  | 34.24 | sp Q96RT1 LAP2_HUMAN.AQIPEGDY[Pho]LSYR.+2y9+2.light            | 38.3 |
| 746.329414 | 313.187031  | 34.24 | sp Q96RT1 LAP2_HUMAN.AQIPEGDY[Pho]LSYR.+2b3.light              | 38.3 |
| 751.333548 | 1189.480065 | 34.24 | sp Q96RT1 LAP2_HUMAN.AQIPEGDY[Pho]LSYR.+2y9.heavy              | 38.3 |
| 751.333548 | 963.384708  | 34.24 | sp Q96RT1 LAP2_HUMAN.AQIPEGDY[Pho]LSYR.+2y7.heavy              | 38.3 |
| 751.333548 | 651.785703  | 34.24 | sp Q96RT1 LAP2_HUMAN.AQIPEGDY[Pho]LSYR.+2y10+2.heavy           | 38.3 |
| 751.333548 | 595.243671  | 34.24 | sp Q96RT1 LAP2_HUMAN.AQIPEGDY[Pho]LSYR.+2y9+2.heavy            | 38.3 |
| 751.333548 | 313.187031  | 34.24 | sp Q96RT1 LAP2_HUMAN.AQIPEGDY[Pho]LSYR.+2b3.heavy              | 38.3 |
| 803.039003 | 781.49305   | 39.92 | sp Q12888 TP53B_HUMAN.SGTAETEPVEQDSS[Pho]QPSLPLVR.+3y7.light   | 41.5 |
| 803.039003 | 684.440286  | 39.92 | sp Q12888 TP53B_HUMAN.SGTAETEPVEQDSS[Pho]QPSLPLVR.+3y6.light   | 41.5 |
| 803.039003 | 597.408258  | 39.92 | sp Q12888 TP53B_HUMAN.SGTAETEPVEQDSS[Pho]QPSLPLVR.+3y5.light   | 41.5 |
| 803.039003 | 484.324194  | 39.92 | sp Q12888 TP53B_HUMAN.SGTAETEPVEQDSS[Pho]QPSLPLVR.+3y4.light   | 41.5 |
| 803.039003 | 391.250163  | 39.92 | sp Q12888 TP53B_HUMAN.SGTAETEPVEQDSS[Pho]QPSLPLVR.+3y7+2.light | 41.5 |
| 806.375092 | 791.501319  | 39.92 | sp Q12888 TP53B_HUMAN.SGTAETEPVEQDSS[Pho]QPSLPLVR.+3y7.heavy   | 41.5 |
| 806.375092 | 694.448555  | 39.92 | sp Q12888 TP53B_HUMAN.SGTAETEPVEQDSS[Pho]QPSLPLVR.+3y6.heavy   | 41.5 |
| 806.375092 | 607.416527  | 39.92 | sp Q12888 TP53B_HUMAN.SGTAETEPVEQDSS[Pho]QPSLPLVR.+3y5.heavy   | 41.5 |
| 806.375092 | 494.332463  | 39.92 | sp Q12888 TP53B_HUMAN.SGTAETEPVEQDSS[Pho]QPSLPLVR.+3y4.heavy   | 41.5 |
| 806.375092 | 396.254297  | 39.92 | sp Q12888 TP53B_HUMAN.SGTAETEPVEQDSS[Pho]QPSLPLVR.+3y7+2.heavy | 41.5 |
| 832.879999 | 810.339325  | 13.6  | sp Q12888 TP53B_HUMAN.LDQELQQPQT[Pho]QEK.+2y6.light            | 42.1 |
| 832.879999 | 357.176861  | 13.6  | sp Q12888 TP53B_HUMAN.LDQELQQPQT[Pho]QEK.+2b3.light            | 42.1 |
| 832.879999 | 486.219454  | 13.6  | sp Q12888 TP53B_HUMAN.LDQELQQPQT[Pho]QEK.+2b4.light            | 42.1 |
| 832.879999 | 599.303518  | 13.6  | sp Q12888 TP53B_HUMAN.LDQELQQPQT[Pho]QEK.+2b5.light            | 42.1 |
| 832.879999 | 855.420673  | 13.6  | sp Q12888 TP53B_HUMAN.LDQELQQPQT[Pho]QEK.+2b7.light            | 42.1 |
| 836.887099 | 818.353524  | 13.6  | sp Q12888 TP53B_HUMAN.LDQELQQPQT[Pho]QEK.+2y6.heavy            | 42.1 |
| 836.887099 | 357.176861  | 13.6  | sp Q12888 TP53B_HUMAN.LDQELQQPQT[Pho]QEK.+2b3.heavy            | 42.1 |

|            |             |       |                                                                 |      |
|------------|-------------|-------|-----------------------------------------------------------------|------|
| 836.887099 | 486.219454  | 13.6  | sp Q12888 TP53B_HUMAN.LDQELQQPQT[Pho]QEK.+2b4.heavy             | 42.1 |
| 836.887099 | 599.303518  | 13.6  | sp Q12888 TP53B_HUMAN.LDQELQQPQT[Pho]QEK.+2b5.heavy             | 42.1 |
| 836.887099 | 855.420673  | 13.6  | sp Q12888 TP53B_HUMAN.LDQELQQPQT[Pho]QEK.+2b7.heavy             | 42.1 |
| 583.576746 | 731.833179  | 15.48 | sp Q12888 TP53B_HUMAN.TSS[Pho]GTSLSAMHSSGSSGK.+3y16 -98+2.light | 30.3 |
| 583.576746 | 697.322447  | 15.48 | sp Q12888 TP53B_HUMAN.TSS[Pho]GTSLSAMHSSGSSGK.+3y15+2.light     | 30.3 |
| 583.576746 | 618.287876  | 15.48 | sp Q12888 TP53B_HUMAN.TSS[Pho]GTSLSAMHSSGSSGK.+3y13+2.light     | 30.3 |
| 583.576746 | 518.22983   | 15.48 | sp Q12888 TP53B_HUMAN.TSS[Pho]GTSLSAMHSSGSSGK.+3y11+2.light     | 30.3 |
| 583.576746 | 488.224545  | 15.48 | sp Q12888 TP53B_HUMAN.TSS[Pho]GTSLSAMHSSGSSGK.+3y16 -98+3.light | 30.3 |
| 586.248145 | 735.840278  | 15.48 | sp Q12888 TP53B_HUMAN.TSS[Pho]GTSLSAMHSSGSSGK.+3y16 -98+2.heavy | 30.3 |
| 586.248145 | 701.329547  | 15.48 | sp Q12888 TP53B_HUMAN.TSS[Pho]GTSLSAMHSSGSSGK.+3y15+2.heavy     | 30.3 |
| 586.248145 | 622.294976  | 15.48 | sp Q12888 TP53B_HUMAN.TSS[Pho]GTSLSAMHSSGSSGK.+3y13+2.heavy     | 30.3 |
| 586.248145 | 522.236929  | 15.48 | sp Q12888 TP53B_HUMAN.TSS[Pho]GTSLSAMHSSGSSGK.+3y11+2.heavy     | 30.3 |
| 586.248145 | 490.895944  | 15.48 | sp Q12888 TP53B_HUMAN.TSS[Pho]GTSLSAMHSSGSSGK.+3y16 -98+3.heavy | 30.3 |
| 731.850513 | 963.465923  | 26.7  | sp Q96T58 MINT_HUMAN.ELQEAAVPTT[Pho]PR.+2y9.light               | 37.7 |
| 731.850513 | 892.428809  | 26.7  | sp Q96T58 MINT_HUMAN.ELQEAAVPTT[Pho]PR.+2y8.light               | 37.7 |
| 731.850513 | 821.391695  | 26.7  | sp Q96T58 MINT_HUMAN.ELQEAAVPTT[Pho]PR.+2y7.light               | 37.7 |
| 731.850513 | 750.354581  | 26.7  | sp Q96T58 MINT_HUMAN.ELQEAAVPTT[Pho]PR.+2y6.light               | 37.7 |
| 731.850513 | 651.286168  | 26.7  | sp Q96T58 MINT_HUMAN.ELQEAAVPTT[Pho]PR.+2y5.light               | 37.7 |
| 736.854648 | 973.474192  | 26.7  | sp Q96T58 MINT_HUMAN.ELQEAAVPTT[Pho]PR.+2y9.heavy               | 37.7 |
| 736.854648 | 902.437078  | 26.7  | sp Q96T58 MINT_HUMAN.ELQEAAVPTT[Pho]PR.+2y8.heavy               | 37.7 |
| 736.854648 | 831.399964  | 26.7  | sp Q96T58 MINT_HUMAN.ELQEAAVPTT[Pho]PR.+2y7.heavy               | 37.7 |
| 736.854648 | 760.36285   | 26.7  | sp Q96T58 MINT_HUMAN.ELQEAAVPTT[Pho]PR.+2y6.heavy               | 37.7 |
| 736.854648 | 661.294437  | 26.7  | sp Q96T58 MINT_HUMAN.ELQEAAVPTT[Pho]PR.+2y5.heavy               | 37.7 |
| 900.335818 | 1193.435805 | 25.07 | sp Q9Y6X4 F169A_HUMAN.FQDSEFSSS[Pho]QGEDEK.+2y10.light          | 45.1 |
| 900.335818 | 1046.367391 | 25.07 | sp Q9Y6X4 F169A_HUMAN.FQDSEFSSS[Pho]QGEDEK.+2y9.light           | 45.1 |
| 900.335818 | 959.335362  | 25.07 | sp Q9Y6X4 F169A_HUMAN.FQDSEFSSS[Pho]QGEDEK.+2y8.light           | 45.1 |
| 900.335818 | 928.368303  | 25.07 | sp Q9Y6X4 F169A_HUMAN.FQDSEFSSS[Pho]QGEDEK.+2b8.light           | 45.1 |
| 900.335818 | 1223.42524  | 25.07 | sp Q9Y6X4 F169A_HUMAN.FQDSEFSSS[Pho]QGEDEK.+2b10.light          | 45.1 |
| 904.342918 | 1201.450004 | 25.07 | sp Q9Y6X4 F169A_HUMAN.FQDSEFSSS[Pho]QGEDEK.+2y10.heavy          | 45.1 |
| 904.342918 | 1054.38159  | 25.07 | sp Q9Y6X4 F169A_HUMAN.FQDSEFSSS[Pho]QGEDEK.+2y9.heavy           | 45.1 |
| 904.342918 | 967.349561  | 25.07 | sp Q9Y6X4 F169A_HUMAN.FQDSEFSSS[Pho]QGEDEK.+2y8.heavy           | 45.1 |
| 904.342918 | 928.368303  | 25.07 | sp Q9Y6X4 F169A_HUMAN.FQDSEFSSS[Pho]QGEDEK.+2b8.heavy           | 45.1 |
| 904.342918 | 1223.42524  | 25.07 | sp Q9Y6X4 F169A_HUMAN.FQDSEFSSS[Pho]QGEDEK.+2b10.heavy          | 45.1 |
| 857.462971 | 876.459047  | 47.92 | sp Q15554 TERF2_HUMAN.DLVLPQTALPAS[Pho]PALK.+2y8.light          | 43.2 |
| 857.462971 | 763.374983  | 47.92 | sp Q15554 TERF2_HUMAN.DLVLPQTALPAS[Pho]PALK.+2y7.light          | 43.2 |
| 857.462971 | 428.286745  | 47.92 | sp Q15554 TERF2_HUMAN.DLVLPQTALPAS[Pho]PALK.+2y4.light          | 43.2 |
| 857.462971 | 637.331228  | 47.92 | sp Q15554 TERF2_HUMAN.DLVLPQTALPAS[Pho]PALK.+2y12+2.light       | 43.2 |
| 857.462971 | 441.270761  | 47.92 | sp Q15554 TERF2_HUMAN.DLVLPQTALPAS[Pho]PALK.+2b4.light          | 43.2 |
| 861.47007  | 884.473246  | 47.92 | sp Q15554 TERF2_HUMAN.DLVLPQTALPAS[Pho]PALK.+2y8.heavy          | 43.2 |
| 861.47007  | 771.389182  | 47.92 | sp Q15554 TERF2_HUMAN.DLVLPQTALPAS[Pho]PALK.+2y7.heavy          | 43.2 |
| 861.47007  | 436.300944  | 47.92 | sp Q15554 TERF2_HUMAN.DLVLPQTALPAS[Pho]PALK.+2y4.heavy          | 43.2 |
| 861.47007  | 641.338328  | 47.92 | sp Q15554 TERF2_HUMAN.DLVLPQTALPAS[Pho]PALK.+2y12+2.heavy       | 43.2 |
| 861.47007  | 441.270761  | 47.92 | sp Q15554 TERF2_HUMAN.DLVLPQTALPAS[Pho]PALK.+2b4.heavy          | 43.2 |
| 712.008315 | 916.498589  | 48.27 | sp O15530 PDPK1_HUMAN.ANS[Pho]FVGTAQYVSPPELLTEK.+3y8.light      | 36.8 |
| 712.008315 | 829.46656   | 48.27 | sp O15530 PDPK1_HUMAN.ANS[Pho]FVGTAQYVSPPELLTEK.+3y7.light      | 36.8 |
| 712.008315 | 603.371203  | 48.27 | sp O15530 PDPK1_HUMAN.ANS[Pho]FVGTAQYVSPPELLTEK.+3y5.light      | 36.8 |
| 712.008315 | 377.203075  | 48.27 | sp O15530 PDPK1_HUMAN.ANS[Pho]FVGTAQYVSPPELLTEK.+3y3.light      | 36.8 |
| 712.008315 | 599.222505  | 48.27 | sp O15530 PDPK1_HUMAN.ANS[Pho]FVGTAQYVSPPELLTEK.+3b5.light      | 36.8 |
| 714.679715 | 924.512788  | 48.27 | sp O15530 PDPK1_HUMAN.ANS[Pho]FVGTAQYVSPPELLTEK.+3y8.heavy      | 36.8 |
| 714.679715 | 837.480759  | 48.27 | sp O15530 PDPK1_HUMAN.ANS[Pho]FVGTAQYVSPPELLTEK.+3y7.heavy      | 36.8 |
| 714.679715 | 611.385402  | 48.27 | sp O15530 PDPK1_HUMAN.ANS[Pho]FVGTAQYVSPPELLTEK.+3y5.heavy      | 36.8 |
| 714.679715 | 385.217274  | 48.27 | sp O15530 PDPK1_HUMAN.ANS[Pho]FVGTAQYVSPPELLTEK.+3y3.heavy      | 36.8 |
| 714.679715 | 599.222505  | 48.27 | sp O15530 PDPK1_HUMAN.ANS[Pho]FVGTAQYVSPPELLTEK.+3b5.heavy      | 36.8 |
| 680.269219 | 1102.429991 | 13.94 | sp Q14790 CASP8_HUMAN.EQDSES[Pho]QTLDK.+2y9.light               | 35.4 |
| 680.269219 | 987.403048  | 13.94 | sp Q14790 CASP8_HUMAN.EQDSES[Pho]QTLDK.+2y8.light               | 35.4 |
| 680.269219 | 771.328426  | 13.94 | sp Q14790 CASP8_HUMAN.EQDSES[Pho]QTLDK.+2y6.light               | 35.4 |
| 680.269219 | 604.330067  | 13.94 | sp Q14790 CASP8_HUMAN.EQDSES[Pho]QTLDK.+2y5.light               | 35.4 |

|            |             |       |                                                                |      |
|------------|-------------|-------|----------------------------------------------------------------|------|
| 680.269219 | 476.271489  | 13.94 | sp Q14790 CASP8_HUMAN.EQDSES[Pho]QTLDK.+2y4.light              | 35.4 |
| 684.276318 | 1110.44419  | 13.94 | sp Q14790 CASP8_HUMAN.EQDSES[Pho]QTLDK.+2y9.heavy              | 35.4 |
| 684.276318 | 995.417247  | 13.94 | sp Q14790 CASP8_HUMAN.EQDSES[Pho]QTLDK.+2y8.heavy              | 35.4 |
| 684.276318 | 779.342625  | 13.94 | sp Q14790 CASP8_HUMAN.EQDSES[Pho]QTLDK.+2y6.heavy              | 35.4 |
| 684.276318 | 612.344266  | 13.94 | sp Q14790 CASP8_HUMAN.EQDSES[Pho]QTLDK.+2y5.heavy              | 35.4 |
| 684.276318 | 484.285688  | 13.94 | sp Q14790 CASP8_HUMAN.EQDSES[Pho]QTLDK.+2y4.heavy              | 35.4 |
| 775.871111 | 1080.497283 | 35.2  | sp P23396 RS3_HUMAN.DEILPTT[Pho]PISEQK.+2y9.light              | 39.6 |
| 775.871111 | 701.382831  | 35.2  | sp P23396 RS3_HUMAN.DEILPTT[Pho]PISEQK.+2y6.light              | 39.6 |
| 775.871111 | 597.294311  | 35.2  | sp P23396 RS3_HUMAN.DEILPTT[Pho]PISEQK.+2y10+2.light           | 39.6 |
| 775.871111 | 540.752279  | 35.2  | sp P23396 RS3_HUMAN.DEILPTT[Pho]PISEQK.+2y9+2.light            | 39.6 |
| 775.871111 | 358.160876  | 35.2  | sp P23396 RS3_HUMAN.DEILPTT[Pho]PISEQK.+2b3.light              | 39.6 |
| 779.878211 | 1088.511482 | 35.2  | sp P23396 RS3_HUMAN.DEILPTT[Pho]PISEQK.+2y9.heavy              | 39.6 |
| 779.878211 | 709.39703   | 35.2  | sp P23396 RS3_HUMAN.DEILPTT[Pho]PISEQK.+2y6.heavy              | 39.6 |
| 779.878211 | 601.301411  | 35.2  | sp P23396 RS3_HUMAN.DEILPTT[Pho]PISEQK.+2y10+2.heavy           | 39.6 |
| 779.878211 | 544.759379  | 35.2  | sp P23396 RS3_HUMAN.DEILPTT[Pho]PISEQK.+2y9+2.heavy            | 39.6 |
| 779.878211 | 358.160876  | 35.2  | sp P23396 RS3_HUMAN.DEILPTT[Pho]PISEQK.+2b3.heavy              | 39.6 |
| 482.692222 | 792.292375  | 15    | sp P53396 ACLY_HUMAN.TAS[Pho]FSESR.+2y6.light                  | 26.7 |
| 482.692222 | 625.294016  | 15    | sp P53396 ACLY_HUMAN.TAS[Pho]FSESR.+2y5.light                  | 26.7 |
| 482.692222 | 391.193573  | 15    | sp P53396 ACLY_HUMAN.TAS[Pho]FSESR.+2y3.light                  | 26.7 |
| 482.692222 | 340.090428  | 15    | sp P53396 ACLY_HUMAN.TAS[Pho]FSESR.+2b3.light                  | 26.7 |
| 482.692222 | 352.12037   | 15    | sp P53396 ACLY_HUMAN.TAS[Pho]FSESR.+2b6+2.light                | 26.7 |
| 487.696356 | 802.300644  | 15    | sp P53396 ACLY_HUMAN.TAS[Pho]FSESR.+2y6.heavy                  | 26.7 |
| 487.696356 | 635.302285  | 15    | sp P53396 ACLY_HUMAN.TAS[Pho]FSESR.+2y5.heavy                  | 26.7 |
| 487.696356 | 401.201842  | 15    | sp P53396 ACLY_HUMAN.TAS[Pho]FSESR.+2y3.heavy                  | 26.7 |
| 487.696356 | 340.090428  | 15    | sp P53396 ACLY_HUMAN.TAS[Pho]FSESR.+2b3.heavy                  | 26.7 |
| 487.696356 | 352.12037   | 15    | sp P53396 ACLY_HUMAN.TAS[Pho]FSESR.+2b6+2.heavy                | 26.7 |
| 887.88664  | 651.286168  | 28.71 | sp P17544 ATF7_HUMAN.TDSVIIADQT[Pho]PT[Pho]PTR.+2y5.light      | 44.6 |
| 887.88664  | 373.219394  | 28.71 | sp P17544 ATF7_HUMAN.TDSVIIADQT[Pho]PT[Pho]PTR.+2y3.light      | 44.6 |
| 887.88664  | 304.113926  | 28.71 | sp P17544 ATF7_HUMAN.TDSVIIADQT[Pho]PT[Pho]PTR.+2b3.light      | 44.6 |
| 887.88664  | 403.18234   | 28.71 | sp P17544 ATF7_HUMAN.TDSVIIADQT[Pho]PT[Pho]PTR.+2b4.light      | 44.6 |
| 887.88664  | 516.266404  | 28.71 | sp P17544 ATF7_HUMAN.TDSVIIADQT[Pho]PT[Pho]PTR.+2b5.light      | 44.6 |
| 892.890774 | 661.294437  | 28.71 | sp P17544 ATF7_HUMAN.TDSVIIADQT[Pho]PT[Pho]PTR.+2y5.heavy      | 44.6 |
| 892.890774 | 383.227663  | 28.71 | sp P17544 ATF7_HUMAN.TDSVIIADQT[Pho]PT[Pho]PTR.+2y3.heavy      | 44.6 |
| 892.890774 | 304.113926  | 28.71 | sp P17544 ATF7_HUMAN.TDSVIIADQT[Pho]PT[Pho]PTR.+2b3.heavy      | 44.6 |
| 892.890774 | 403.18234   | 28.71 | sp P17544 ATF7_HUMAN.TDSVIIADQT[Pho]PT[Pho]PTR.+2b4.heavy      | 44.6 |
| 892.890774 | 516.266404  | 28.71 | sp P17544 ATF7_HUMAN.TDSVIIADQT[Pho]PT[Pho]PTR.+2b5.heavy      | 44.6 |
| 887.376439 | 651.286168  | 25.28 | sp P15336 ATF2_HUMAN.NDSVIVADQT[Pho]PT[Pho]PTR.+2y5.light      | 44.5 |
| 887.376439 | 373.219394  | 25.28 | sp P15336 ATF2_HUMAN.NDSVIVADQT[Pho]PT[Pho]PTR.+2y3.light      | 44.5 |
| 887.376439 | 317.109175  | 25.28 | sp P15336 ATF2_HUMAN.NDSVIVADQT[Pho]PT[Pho]PTR.+2b3.light      | 44.5 |
| 887.376439 | 416.177589  | 25.28 | sp P15336 ATF2_HUMAN.NDSVIVADQT[Pho]PT[Pho]PTR.+2b4.light      | 44.5 |
| 887.376439 | 529.261653  | 25.28 | sp P15336 ATF2_HUMAN.NDSVIVADQT[Pho]PT[Pho]PTR.+2b5.light      | 44.5 |
| 892.380574 | 661.294437  | 25.28 | sp P15336 ATF2_HUMAN.NDSVIVADQT[Pho]PT[Pho]PTR.+2y5.heavy      | 44.5 |
| 892.380574 | 383.227663  | 25.28 | sp P15336 ATF2_HUMAN.NDSVIVADQT[Pho]PT[Pho]PTR.+2y3.heavy      | 44.5 |
| 892.380574 | 317.109175  | 25.28 | sp P15336 ATF2_HUMAN.NDSVIVADQT[Pho]PT[Pho]PTR.+2b3.heavy      | 44.5 |
| 892.380574 | 416.177589  | 25.28 | sp P15336 ATF2_HUMAN.NDSVIVADQT[Pho]PT[Pho]PTR.+2b4.heavy      | 44.5 |
| 892.380574 | 529.261653  | 25.28 | sp P15336 ATF2_HUMAN.NDSVIVADQT[Pho]PT[Pho]PTR.+2b5.heavy      | 44.5 |
| 763.332409 | 504.241252  | 26.82 | sp P46013 KI67_HUMAN.SGGSGHAVAEPAS[Pho]PEQELDQNK.+3y4.light    | 39.4 |
| 763.332409 | 718.308678  | 26.82 | sp P46013 KI67_HUMAN.SGGSGHAVAEPAS[Pho]PEQELDQNK.+3y12+2.light | 39.4 |
| 763.332409 | 550.76456   | 26.82 | sp P46013 KI67_HUMAN.SGGSGHAVAEPAS[Pho]PEQELDQNK.+3y9+2.light  | 39.4 |
| 763.332409 | 653.300164  | 26.82 | sp P46013 KI67_HUMAN.SGGSGHAVAEPAS[Pho]PEQELDQNK.+3b8.light    | 39.4 |
| 763.332409 | 853.379871  | 26.82 | sp P46013 KI67_HUMAN.SGGSGHAVAEPAS[Pho]PEQELDQNK.+3b10.light   | 39.4 |
| 766.003809 | 512.255451  | 26.82 | sp P46013 KI67_HUMAN.SGGSGHAVAEPAS[Pho]PEQELDQNK.+3y4.heavy    | 39.4 |
| 766.003809 | 722.315778  | 26.82 | sp P46013 KI67_HUMAN.SGGSGHAVAEPAS[Pho]PEQELDQNK.+3y12+2.heavy | 39.4 |
| 766.003809 | 554.771659  | 26.82 | sp P46013 KI67_HUMAN.SGGSGHAVAEPAS[Pho]PEQELDQNK.+3y9+2.heavy  | 39.4 |
| 766.003809 | 653.300164  | 26.82 | sp P46013 KI67_HUMAN.SGGSGHAVAEPAS[Pho]PEQELDQNK.+3b8.heavy    | 39.4 |
| 766.003809 | 853.379871  | 26.82 | sp P46013 KI67_HUMAN.SGGSGHAVAEPAS[Pho]PEQELDQNK.+3b10.heavy   | 39.4 |
| 723.983841 | 749.386202  | 39.89 | sp Q09161 NCBP1_HUMAN.KTS[Pho]DANETEDHLESIC[CAM]K.+3y6.light   | 37.4 |

|            |             |       |                                                                   |      |
|------------|-------------|-------|-------------------------------------------------------------------|------|
| 723.983841 | 307.143452  | 39.89 | sp Q09161 NCBP1_HUMAN.KTS[Pho]DANETEDHLES LIC[CAM]K.+3y2.light    | 37.4 |
| 723.983841 | 672.826834  | 39.89 | sp Q09161 NCBP1_HUMAN.KTS[Pho]DANETEDHLES LIC[CAM]K.+3y11+2.light | 37.4 |
| 723.983841 | 310.675442  | 39.89 | sp Q09161 NCBP1_HUMAN.KTS[Pho]DANETEDHLES LIC[CAM]K.+3y5+2.light  | 37.4 |
| 723.983841 | 654.740629  | 39.89 | sp Q09161 NCBP1_HUMAN.KTS[Pho]DANETEDHLES LIC[CAM]K.+3b11+2.light | 37.4 |
| 726.655241 | 757.400401  | 39.89 | sp Q09161 NCBP1_HUMAN.KTS[Pho]DANETEDHLES LIC[CAM]K.+3y6.heavy    | 37.4 |
| 726.655241 | 315.157651  | 39.89 | sp Q09161 NCBP1_HUMAN.KTS[Pho]DANETEDHLES LIC[CAM]K.+3y2.heavy    | 37.4 |
| 726.655241 | 676.833934  | 39.89 | sp Q09161 NCBP1_HUMAN.KTS[Pho]DANETEDHLES LIC[CAM]K.+3y11+2.heavy | 37.4 |
| 726.655241 | 314.682542  | 39.89 | sp Q09161 NCBP1_HUMAN.KTS[Pho]DANETEDHLES LIC[CAM]K.+3y5+2.heavy  | 37.4 |
| 726.655241 | 654.740629  | 39.89 | sp Q09161 NCBP1_HUMAN.KTS[Pho]DANETEDHLES LIC[CAM]K.+3b11+2.heavy | 37.4 |
| 502.908207 | 690.297067  | 29.15 | sp P29590 PML_HUMAN.AVSPPHLDGPPS[Pho]PR.+3y6.light                | 26.1 |
| 502.908207 | 668.805909  | 29.15 | sp P29590 PML_HUMAN.AVSPPHLDGPPS[Pho]PR.+3y12+2.light             | 26.1 |
| 502.908207 | 625.289895  | 29.15 | sp P29590 PML_HUMAN.AVSPPHLDGPPS[Pho]PR.+3y11+2.light             | 26.1 |
| 502.908207 | 576.763513  | 29.15 | sp P29590 PML_HUMAN.AVSPPHLDGPPS[Pho]PR.+3y10+2.light             | 26.1 |
| 502.908207 | 528.237131  | 29.15 | sp P29590 PML_HUMAN.AVSPPHLDGPPS[Pho]PR.+3y9+2.light              | 26.1 |
| 506.244297 | 700.305336  | 29.15 | sp P29590 PML_HUMAN.AVSPPHLDGPPS[Pho]PR.+3y6.heavy                | 26.1 |
| 506.244297 | 673.810043  | 29.15 | sp P29590 PML_HUMAN.AVSPPHLDGPPS[Pho]PR.+3y12+2.heavy             | 26.1 |
| 506.244297 | 630.294029  | 29.15 | sp P29590 PML_HUMAN.AVSPPHLDGPPS[Pho]PR.+3y11+2.heavy             | 26.1 |
| 506.244297 | 581.767647  | 29.15 | sp P29590 PML_HUMAN.AVSPPHLDGPPS[Pho]PR.+3y10+2.heavy             | 26.1 |
| 506.244297 | 533.241265  | 29.15 | sp P29590 PML_HUMAN.AVSPPHLDGPPS[Pho]PR.+3y9+2.heavy              | 26.1 |
| 539.680997 | 800.264446  | 19.58 | sp P61978 HNRPK_HUMAN.DYDDMS[Pho]PR.+2y6.light                    | 29.2 |
| 539.680997 | 685.237503  | 19.58 | sp P61978 HNRPK_HUMAN.DYDDMS[Pho]PR.+2y5.light                    | 29.2 |
| 539.680997 | 570.21056   | 19.58 | sp P61978 HNRPK_HUMAN.DYDDMS[Pho]PR.+2y4.light                    | 29.2 |
| 539.680997 | 439.170075  | 19.58 | sp P61978 HNRPK_HUMAN.DYDDMS[Pho]PR.+2y3.light                    | 29.2 |
| 539.680997 | 509.151434  | 19.58 | sp P61978 HNRPK_HUMAN.DYDDMS[Pho]PR.+2b4.light                    | 29.2 |
| 544.685131 | 810.272715  | 19.58 | sp P61978 HNRPK_HUMAN.DYDDMS[Pho]PR.+2y6.heavy                    | 29.2 |
| 544.685131 | 695.245772  | 19.58 | sp P61978 HNRPK_HUMAN.DYDDMS[Pho]PR.+2y5.heavy                    | 29.2 |
| 544.685131 | 580.218829  | 19.58 | sp P61978 HNRPK_HUMAN.DYDDMS[Pho]PR.+2y4.heavy                    | 29.2 |
| 544.685131 | 449.178344  | 19.58 | sp P61978 HNRPK_HUMAN.DYDDMS[Pho]PR.+2y3.heavy                    | 29.2 |
| 544.685131 | 509.151434  | 19.58 | sp P61978 HNRPK_HUMAN.DYDDMS[Pho]PR.+2b4.heavy                    | 29.2 |
| 734.863424 | 907.46486   | 48.64 | sp P16949 STMN1_HUMAN.ASGQAFELILS[Pho]PR.+2y7.light               | 37.8 |
| 734.863424 | 665.338203  | 48.64 | sp P16949 STMN1_HUMAN.ASGQAFELILS[Pho]PR.+2y5.light               | 37.8 |
| 734.863424 | 552.254139  | 48.64 | sp P16949 STMN1_HUMAN.ASGQAFELILS[Pho]PR.+2y4.light               | 37.8 |
| 734.863424 | 439.170075  | 48.64 | sp P16949 STMN1_HUMAN.ASGQAFELILS[Pho]PR.+2y3.light               | 37.8 |
| 734.863424 | 562.261987  | 48.64 | sp P16949 STMN1_HUMAN.ASGQAFELILS[Pho]PR.+2b6.light               | 37.8 |
| 739.867558 | 917.473129  | 48.64 | sp P16949 STMN1_HUMAN.ASGQAFELILS[Pho]PR.+2y7.heavy               | 37.8 |
| 739.867558 | 675.346472  | 48.64 | sp P16949 STMN1_HUMAN.ASGQAFELILS[Pho]PR.+2y5.heavy               | 37.8 |
| 739.867558 | 562.262408  | 48.64 | sp P16949 STMN1_HUMAN.ASGQAFELILS[Pho]PR.+2y4.heavy               | 37.8 |
| 739.867558 | 449.178344  | 48.64 | sp P16949 STMN1_HUMAN.ASGQAFELILS[Pho]PR.+2y3.heavy               | 37.8 |
| 739.867558 | 562.261987  | 48.64 | sp P16949 STMN1_HUMAN.ASGQAFELILS[Pho]PR.+2b6.heavy               | 37.8 |
| 703.833801 | 865.421933  | 44.19 | sp P16949 STMN1_HUMAN.ESVPEFPLS[Pho]PPK.+2y7.light                | 36.5 |
| 703.833801 | 718.353519  | 44.19 | sp P16949 STMN1_HUMAN.ESVPEFPLS[Pho]PPK.+2y6.light                | 36.5 |
| 703.833801 | 341.218332  | 44.19 | sp P16949 STMN1_HUMAN.ESVPEFPLS[Pho]PPK.+2y3.light                | 36.5 |
| 703.833801 | 546.262283  | 44.19 | sp P16949 STMN1_HUMAN.ESVPEFPLS[Pho]PPK.+2y9+2.light              | 36.5 |
| 703.833801 | 497.735901  | 44.19 | sp P16949 STMN1_HUMAN.ESVPEFPLS[Pho]PPK.+2y8+2.light              | 36.5 |
| 707.8409   | 873.436132  | 44.19 | sp P16949 STMN1_HUMAN.ESVPEFPLS[Pho]PPK.+2y7.heavy                | 36.5 |
| 707.8409   | 726.367718  | 44.19 | sp P16949 STMN1_HUMAN.ESVPEFPLS[Pho]PPK.+2y6.heavy                | 36.5 |
| 707.8409   | 349.23253   | 44.19 | sp P16949 STMN1_HUMAN.ESVPEFPLS[Pho]PPK.+2y3.heavy                | 36.5 |
| 707.8409   | 550.269382  | 44.19 | sp P16949 STMN1_HUMAN.ESVPEFPLS[Pho]PPK.+2y9+2.heavy              | 36.5 |
| 707.8409   | 501.743     | 44.19 | sp P16949 STMN1_HUMAN.ESVPEFPLS[Pho]PPK.+2y8+2.heavy              | 36.5 |
| 767.389274 | 1031.492138 | 50    | sp P04198 MYCN_HUMAN.FELLTPPLS[Pho]PSR.+2y9.light                 | 39.3 |
| 767.389274 | 833.391695  | 50    | sp P04198 MYCN_HUMAN.FELLTPPLS[Pho]PSR.+2y7.light                 | 39.3 |
| 767.389274 | 359.203744  | 50    | sp P04198 MYCN_HUMAN.FELLTPPLS[Pho]PSR.+2y3.light                 | 39.3 |
| 767.389274 | 417.199486  | 50    | sp P04198 MYCN_HUMAN.FELLTPPLS[Pho]PSR.+2y7+2.light               | 39.3 |
| 767.389274 | 390.202347  | 50    | sp P04198 MYCN_HUMAN.FELLTPPLS[Pho]PSR.+2b3.light                 | 39.3 |
| 772.393409 | 1041.500407 | 50    | sp P04198 MYCN_HUMAN.FELLTPPLS[Pho]PSR.+2y9.heavy                 | 39.3 |
| 772.393409 | 843.399964  | 50    | sp P04198 MYCN_HUMAN.FELLTPPLS[Pho]PSR.+2y7.heavy                 | 39.3 |
| 772.393409 | 369.212013  | 50    | sp P04198 MYCN_HUMAN.FELLTPPLS[Pho]PSR.+2y3.heavy                 | 39.3 |

|            |            |       |                                                                        |      |
|------------|------------|-------|------------------------------------------------------------------------|------|
| 772.393409 | 422.20362  | 50    | sp P04198 MYCN_HUMAN.FELLTPPLS[Pho]PSR.+2y7+2.heavy                    | 39.3 |
| 772.393409 | 390.202347 | 50    | sp P04198 MYCN_HUMAN.FELLTPPLS[Pho]PSR.+2b3.heavy                      | 39.3 |
| 797.357856 | 895.374331 | 47.41 | sp P40763 STAT3_HUMAN.FIC[CAM]VTPPTC[CAM]SNTIDLPMMS[Pho]PR.+3y7.light  | 41.2 |
| 797.357856 | 667.263324 | 47.41 | sp P40763 STAT3_HUMAN.FIC[CAM]VTPPTC[CAM]SNTIDLPMMS[Pho]PR.+3y5.light  | 41.2 |
| 797.357856 | 439.170075 | 47.41 | sp P40763 STAT3_HUMAN.FIC[CAM]VTPPTC[CAM]SNTIDLPMMS[Pho]PR.+3y3.light  | 41.2 |
| 797.357856 | 334.1353   | 47.41 | sp P40763 STAT3_HUMAN.FIC[CAM]VTPPTC[CAM]SNTIDLPMMS[Pho]PR.+3y5+2.ligh | 41.2 |
| 797.357856 | 421.190402 | 47.41 | sp P40763 STAT3_HUMAN.FIC[CAM]VTPPTC[CAM]SNTIDLPMMS[Pho]PR.+3b3.light  | 41.2 |
| 800.693946 | 905.3826   | 47.41 | sp P40763 STAT3_HUMAN.FIC[CAM]VTPPTC[CAM]SNTIDLPMMS[Pho]PR.+3y7.heavy  | 41.2 |
| 800.693946 | 677.271593 | 47.41 | sp P40763 STAT3_HUMAN.FIC[CAM]VTPPTC[CAM]SNTIDLPMMS[Pho]PR.+3y5.heavy  | 41.2 |
| 800.693946 | 449.178344 | 47.41 | sp P40763 STAT3_HUMAN.FIC[CAM]VTPPTC[CAM]SNTIDLPMMS[Pho]PR.+3y3.heavy  | 41.2 |
| 800.693946 | 339.139434 | 47.41 | sp P40763 STAT3_HUMAN.FIC[CAM]VTPPTC[CAM]SNTIDLPMMS[Pho]PR.+3y5+2.he   | 41.2 |
| 800.693946 | 421.190402 | 47.41 | sp P40763 STAT3_HUMAN.FIC[CAM]VTPPTC[CAM]SNTIDLPMMS[Pho]PR.+3b3.heavy  | 41.2 |
| 502.197671 | 757.251239 | 15.51 | sp Q53EL6 PDCD4_HUMAN.FVS[Pho]EGDGGR.+2y7.light                        | 27.6 |
| 502.197671 | 590.252879 | 15.51 | sp Q53EL6 PDCD4_HUMAN.FVS[Pho]EGDGGR.+2y6.light                        | 27.6 |
| 502.197671 | 461.210286 | 15.51 | sp Q53EL6 PDCD4_HUMAN.FVS[Pho]EGDGGR.+2y5.light                        | 27.6 |
| 502.197671 | 404.188822 | 15.51 | sp Q53EL6 PDCD4_HUMAN.FVS[Pho]EGDGGR.+2y4.light                        | 27.6 |
| 502.197671 | 600.20652  | 15.51 | sp Q53EL6 PDCD4_HUMAN.FVS[Pho]EGDGGR.+2b5.light                        | 27.6 |
| 507.201806 | 767.259508 | 15.51 | sp Q53EL6 PDCD4_HUMAN.FVS[Pho]EGDGGR.+2y7.heavy                        | 27.6 |
| 507.201806 | 600.261148 | 15.51 | sp Q53EL6 PDCD4_HUMAN.FVS[Pho]EGDGGR.+2y6.heavy                        | 27.6 |
| 507.201806 | 471.218555 | 15.51 | sp Q53EL6 PDCD4_HUMAN.FVS[Pho]EGDGGR.+2y5.heavy                        | 27.6 |
| 507.201806 | 414.197091 | 15.51 | sp Q53EL6 PDCD4_HUMAN.FVS[Pho]EGDGGR.+2y4.heavy                        | 27.6 |
| 507.201806 | 600.20652  | 15.51 | sp Q53EL6 PDCD4_HUMAN.FVS[Pho]EGDGGR.+2b5.heavy                        | 27.6 |
| 681.281409 | 964.395795 | 27.6  | sp P49840 GSK3A_HUMAN.GEPNVSY[Pho]IC[CAM]SR.+2y7.light                 | 35.5 |
| 681.281409 | 865.327381 | 27.6  | sp P49840 GSK3A_HUMAN.GEPNVSY[Pho]IC[CAM]SR.+2y6.light                 | 35.5 |
| 681.281409 | 778.295352 | 27.6  | sp P49840 GSK3A_HUMAN.GEPNVSY[Pho]IC[CAM]SR.+2y5.light                 | 35.5 |
| 681.281409 | 535.265693 | 27.6  | sp P49840 GSK3A_HUMAN.GEPNVSY[Pho]IC[CAM]SR.+2y4.light                 | 35.5 |
| 681.281409 | 588.249381 | 27.6  | sp P49840 GSK3A_HUMAN.GEPNVSY[Pho]IC[CAM]SR.+2y9+2.light               | 35.5 |
| 686.285544 | 974.404064 | 27.6  | sp P49840 GSK3A_HUMAN.GEPNVSY[Pho]IC[CAM]SR.+2y7.heavy                 | 35.5 |
| 686.285544 | 875.33565  | 27.6  | sp P49840 GSK3A_HUMAN.GEPNVSY[Pho]IC[CAM]SR.+2y6.heavy                 | 35.5 |
| 686.285544 | 788.303621 | 27.6  | sp P49840 GSK3A_HUMAN.GEPNVSY[Pho]IC[CAM]SR.+2y5.heavy                 | 35.5 |
| 686.285544 | 545.273962 | 27.6  | sp P49840 GSK3A_HUMAN.GEPNVSY[Pho]IC[CAM]SR.+2y4.heavy                 | 35.5 |
| 686.285544 | 593.253516 | 27.6  | sp P49840 GSK3A_HUMAN.GEPNVSY[Pho]IC[CAM]SR.+2y9+2.heavy               | 35.5 |
| 682.316031 | 749.43045  | 44.15 | sp Q9UQE7 SMC3_HUMAN.GSGS[Pho]QSSVPSVDQFTGVGIR.+3y7.light              | 35.3 |
| 682.316031 | 602.362036 | 44.15 | sp Q9UQE7 SMC3_HUMAN.GSGS[Pho]QSSVPSVDQFTGVGIR.+3y6.light              | 35.3 |
| 682.316031 | 501.314357 | 44.15 | sp Q9UQE7 SMC3_HUMAN.GSGS[Pho]QSSVPSVDQFTGVGIR.+3y5.light              | 35.3 |
| 682.316031 | 345.22448  | 44.15 | sp Q9UQE7 SMC3_HUMAN.GSGS[Pho]QSSVPSVDQFTGVGIR.+3y3.light              | 35.3 |
| 682.316031 | 638.338226 | 44.15 | sp Q9UQE7 SMC3_HUMAN.GSGS[Pho]QSSVPSVDQFTGVGIR.+3y12+2.light           | 35.3 |
| 685.65212  | 759.438719 | 44.15 | sp Q9UQE7 SMC3_HUMAN.GSGS[Pho]QSSVPSVDQFTGVGIR.+3y7.heavy              | 35.3 |
| 685.65212  | 612.370305 | 44.15 | sp Q9UQE7 SMC3_HUMAN.GSGS[Pho]QSSVPSVDQFTGVGIR.+3y6.heavy              | 35.3 |
| 685.65212  | 511.322626 | 44.15 | sp Q9UQE7 SMC3_HUMAN.GSGS[Pho]QSSVPSVDQFTGVGIR.+3y5.heavy              | 35.3 |
| 685.65212  | 355.232748 | 44.15 | sp Q9UQE7 SMC3_HUMAN.GSGS[Pho]QSSVPSVDQFTGVGIR.+3y3.heavy              | 35.3 |
| 685.65212  | 643.342361 | 44.15 | sp Q9UQE7 SMC3_HUMAN.GSGS[Pho]QSSVPSVDQFTGVGIR.+3y12+2.heavy           | 35.3 |
| 705.355826 | 882.515576 | 44.3  | sp P00533 EGFR_HUMAN.ELVEPLT[Pho]PSGEAPNQALLR.+3y8.light               | 36.5 |
| 705.355826 | 811.478462 | 44.3  | sp P00533 EGFR_HUMAN.ELVEPLT[Pho]PSGEAPNQALLR.+3y7.light               | 36.5 |
| 705.355826 | 714.425699 | 44.3  | sp P00533 EGFR_HUMAN.ELVEPLT[Pho]PSGEAPNQALLR.+3y6.light               | 36.5 |
| 705.355826 | 401.28708  | 44.3  | sp P00533 EGFR_HUMAN.ELVEPLT[Pho]PSGEAPNQALLR.+3y3.light               | 36.5 |
| 705.355826 | 406.242869 | 44.3  | sp P00533 EGFR_HUMAN.ELVEPLT[Pho]PSGEAPNQALLR.+3y7+2.light             | 36.5 |
| 708.691916 | 892.523845 | 44.3  | sp P00533 EGFR_HUMAN.ELVEPLT[Pho]PSGEAPNQALLR.+3y8.heavy               | 36.5 |
| 708.691916 | 821.486731 | 44.3  | sp P00533 EGFR_HUMAN.ELVEPLT[Pho]PSGEAPNQALLR.+3y7.heavy               | 36.5 |
| 708.691916 | 724.433968 | 44.3  | sp P00533 EGFR_HUMAN.ELVEPLT[Pho]PSGEAPNQALLR.+3y6.heavy               | 36.5 |
| 708.691916 | 411.295349 | 44.3  | sp P00533 EGFR_HUMAN.ELVEPLT[Pho]PSGEAPNQALLR.+3y3.heavy               | 36.5 |
| 708.691916 | 411.247004 | 44.3  | sp P00533 EGFR_HUMAN.ELVEPLT[Pho]PSGEAPNQALLR.+3y7+2.heavy             | 36.5 |
| 645.771732 | 974.397903 | 20.37 | sp P00533 EGFR_HUMAN.GSTAENAEY[Pho]LR.+2y7.light                       | 33.9 |
| 645.771732 | 845.35531  | 20.37 | sp P00533 EGFR_HUMAN.GSTAENAEY[Pho]LR.+2y6.light                       | 33.9 |
| 645.771732 | 731.312382 | 20.37 | sp P00533 EGFR_HUMAN.GSTAENAEY[Pho]LR.+2y5.light                       | 33.9 |
| 645.771732 | 660.275268 | 20.37 | sp P00533 EGFR_HUMAN.GSTAENAEY[Pho]LR.+2y4.light                       | 33.9 |
| 645.771732 | 531.232675 | 20.37 | sp P00533 EGFR_HUMAN.GSTAENAEY[Pho]LR.+2y3.light                       | 33.9 |

|            |             |       |                                                              |      |
|------------|-------------|-------|--------------------------------------------------------------|------|
| 650.775866 | 984.406172  | 20.37 | sp P00533 EGFR_HUMAN.GSTAENAEY[Pho]LR.+2y7.heavy             | 33.9 |
| 650.775866 | 855.363579  | 20.37 | sp P00533 EGFR_HUMAN.GSTAENAEY[Pho]LR.+2y6.heavy             | 33.9 |
| 650.775866 | 741.320651  | 20.37 | sp P00533 EGFR_HUMAN.GSTAENAEY[Pho]LR.+2y5.heavy             | 33.9 |
| 650.775866 | 670.283537  | 20.37 | sp P00533 EGFR_HUMAN.GSTAENAEY[Pho]LR.+2y4.heavy             | 33.9 |
| 650.775866 | 541.240944  | 20.37 | sp P00533 EGFR_HUMAN.GSTAENAEY[Pho]LR.+2y3.heavy             | 33.9 |
| 941.900074 | 1177.477275 | 40.37 | sp Q13535 ATR_HUMAN.GVELC[CAM]FPENET[Pho]PPEGK.+2y10.light   | 46.9 |
| 941.900074 | 527.282388  | 40.37 | sp Q13535 ATR_HUMAN.GVELC[CAM]FPENET[Pho]PPEGK.+2y5.light    | 46.9 |
| 941.900074 | 589.242276  | 40.37 | sp Q13535 ATR_HUMAN.GVELC[CAM]FPENET[Pho]PPEGK.+2y10+2.light | 46.9 |
| 941.900074 | 399.223811  | 40.37 | sp Q13535 ATR_HUMAN.GVELC[CAM]FPENET[Pho]PPEGK.+2b4.light    | 46.9 |
| 941.900074 | 706.322873  | 40.37 | sp Q13535 ATR_HUMAN.GVELC[CAM]FPENET[Pho]PPEGK.+2b6.light    | 46.9 |
| 945.907174 | 1185.491474 | 40.37 | sp Q13535 ATR_HUMAN.GVELC[CAM]FPENET[Pho]PPEGK.+2y10.heavy   | 46.9 |
| 945.907174 | 535.296587  | 40.37 | sp Q13535 ATR_HUMAN.GVELC[CAM]FPENET[Pho]PPEGK.+2y5.heavy    | 46.9 |
| 945.907174 | 593.249375  | 40.37 | sp Q13535 ATR_HUMAN.GVELC[CAM]FPENET[Pho]PPEGK.+2y10+2.heavy | 46.9 |
| 945.907174 | 399.223811  | 40.37 | sp Q13535 ATR_HUMAN.GVELC[CAM]FPENET[Pho]PPEGK.+2b4.heavy    | 46.9 |
| 945.907174 | 706.322873  | 40.37 | sp Q13535 ATR_HUMAN.GVELC[CAM]FPENET[Pho]PPEGK.+2b6.heavy    | 46.9 |
| 464.730619 | 628.402838  | 22.89 | sp P42226 STAT6_HUMAN.GY[Pho]VPATIK.+2y6.light               | 25.9 |
| 464.730619 | 529.334424  | 22.89 | sp P42226 STAT6_HUMAN.GY[Pho]VPATIK.+2y5.light               | 25.9 |
| 464.730619 | 361.244546  | 22.89 | sp P42226 STAT6_HUMAN.GY[Pho]VPATIK.+2y3.light               | 25.9 |
| 464.730619 | 301.058399  | 22.89 | sp P42226 STAT6_HUMAN.GY[Pho]VPATIK.+2b2.light               | 25.9 |
| 464.730619 | 400.126813  | 22.89 | sp P42226 STAT6_HUMAN.GY[Pho]VPATIK.+2b3.light               | 25.9 |
| 468.737718 | 636.417037  | 22.89 | sp P42226 STAT6_HUMAN.GY[Pho]VPATIK.+2y6.heavy               | 25.9 |
| 468.737718 | 537.348623  | 22.89 | sp P42226 STAT6_HUMAN.GY[Pho]VPATIK.+2y5.heavy               | 25.9 |
| 468.737718 | 369.258745  | 22.89 | sp P42226 STAT6_HUMAN.GY[Pho]VPATIK.+2y3.heavy               | 25.9 |
| 468.737718 | 301.058399  | 22.89 | sp P42226 STAT6_HUMAN.GY[Pho]VPATIK.+2b2.heavy               | 25.9 |
| 468.737718 | 400.126813  | 22.89 | sp P42226 STAT6_HUMAN.GY[Pho]VPATIK.+2b3.heavy               | 25.9 |
| 575.768264 | 1037.445187 | 22.68 | sp Q13627 DYR1A_HUMAN.IYQY[Pho]IQSR.+2y7.light               | 30.8 |
| 575.768264 | 874.381859  | 22.68 | sp Q13627 DYR1A_HUMAN.IYQY[Pho]IQSR.+2y6.light               | 30.8 |
| 575.768264 | 746.323281  | 22.68 | sp Q13627 DYR1A_HUMAN.IYQY[Pho]IQSR.+2y5.light               | 30.8 |
| 575.768264 | 519.226232  | 22.68 | sp Q13627 DYR1A_HUMAN.IYQY[Pho]IQSR.+2y7+2.light             | 30.8 |
| 575.768264 | 437.694567  | 22.68 | sp Q13627 DYR1A_HUMAN.IYQY[Pho]IQSR.+2y6+2.light             | 30.8 |
| 580.772398 | 1047.453456 | 22.68 | sp Q13627 DYR1A_HUMAN.IYQY[Pho]IQSR.+2y7.heavy               | 30.8 |
| 580.772398 | 884.390128  | 22.68 | sp Q13627 DYR1A_HUMAN.IYQY[Pho]IQSR.+2y6.heavy               | 30.8 |
| 580.772398 | 756.33155   | 22.68 | sp Q13627 DYR1A_HUMAN.IYQY[Pho]IQSR.+2y5.heavy               | 30.8 |
| 580.772398 | 524.230366  | 22.68 | sp Q13627 DYR1A_HUMAN.IYQY[Pho]IQSR.+2y7+2.heavy             | 30.8 |
| 580.772398 | 442.698702  | 22.68 | sp Q13627 DYR1A_HUMAN.IYQY[Pho]IQSR.+2y6+2.heavy             | 30.8 |
| 553.231711 | 311.123762  | 12.12 | sp P16104 H2AX_HUMAN.KATQAS[Pho]QEY.+2y2.light               | 29.8 |
| 553.231711 | 500.282723  | 12.12 | sp P16104 H2AX_HUMAN.KATQAS[Pho]QEY.+2b5.light               | 29.8 |
| 553.231711 | 667.281082  | 12.12 | sp P16104 H2AX_HUMAN.KATQAS[Pho]QEY.+2b6.light               | 29.8 |
| 553.231711 | 795.33966   | 12.12 | sp P16104 H2AX_HUMAN.KATQAS[Pho]QEY.+2b7.light               | 29.8 |
| 553.231711 | 924.382253  | 12.12 | sp P16104 H2AX_HUMAN.KATQAS[Pho]QEY.+2b8.light               | 29.8 |
| 557.238811 | 311.123762  | 12.12 | sp P16104 H2AX_HUMAN.KATQAS[Pho]QEY.+2y2.heavy               | 29.8 |
| 557.238811 | 508.296922  | 12.12 | sp P16104 H2AX_HUMAN.KATQAS[Pho]QEY.+2b5.heavy               | 29.8 |
| 557.238811 | 675.295281  | 12.12 | sp P16104 H2AX_HUMAN.KATQAS[Pho]QEY.+2b6.heavy               | 29.8 |
| 557.238811 | 803.353859  | 12.12 | sp P16104 H2AX_HUMAN.KATQAS[Pho]QEY.+2b7.heavy               | 29.8 |
| 557.238811 | 932.396452  | 12.12 | sp P16104 H2AX_HUMAN.KATQAS[Pho]QEY.+2b8.heavy               | 29.8 |
| 593.214877 | 509.21194   | 11.77 | sp P16104 H2AX_HUMAN.KAT[Pho]QAS[Pho]QEY.+2b4.light          | 31.6 |
| 593.214877 | 580.249054  | 11.77 | sp P16104 H2AX_HUMAN.KAT[Pho]QAS[Pho]QEY.+2b5.light          | 31.6 |
| 593.214877 | 747.247413  | 11.77 | sp P16104 H2AX_HUMAN.KAT[Pho]QAS[Pho]QEY.+2b6.light          | 31.6 |
| 593.214877 | 777.329095  | 11.77 | sp P16104 H2AX_HUMAN.KAT[Pho]QAS[Pho]QEY.+2b7 -98.light      | 31.6 |
| 593.214877 | 1004.348584 | 11.77 | sp P16104 H2AX_HUMAN.KAT[Pho]QAS[Pho]QEY.+2b8.light          | 31.6 |
| 593.214877 | 906.371688  | 11.77 | sp P16104 H2AX_HUMAN.KAT[Pho]QAS[Pho]QEY.+2b8 -98.light      | 31.6 |
| 597.221976 | 517.226139  | 11.77 | sp P16104 H2AX_HUMAN.KAT[Pho]QAS[Pho]QEY.+2b4.heavy          | 31.6 |
| 597.221976 | 588.263253  | 11.77 | sp P16104 H2AX_HUMAN.KAT[Pho]QAS[Pho]QEY.+2b5.heavy          | 31.6 |
| 597.221976 | 755.261612  | 11.77 | sp P16104 H2AX_HUMAN.KAT[Pho]QAS[Pho]QEY.+2b6.heavy          | 31.6 |
| 597.221976 | 785.343294  | 11.77 | sp P16104 H2AX_HUMAN.KAT[Pho]QAS[Pho]QEY.+2b7 -98.heavy      | 31.6 |
| 597.221976 | 1012.362783 | 11.77 | sp P16104 H2AX_HUMAN.KAT[Pho]QAS[Pho]QEY.+2b8.heavy          | 31.6 |
| 597.221976 | 914.385887  | 11.77 | sp P16104 H2AX_HUMAN.KAT[Pho]QAS[Pho]QEY.+2b8 -98.heavy      | 31.6 |

|            |             |       |                                                               |      |
|------------|-------------|-------|---------------------------------------------------------------|------|
| 790.37181  | 1026.557835 | 37.56 | sp Q8IVT2 MISP_HUMAN.ALS[Pho]SDSILSPAPDAR.+2y10.light         | 40.3 |
| 790.37181  | 826.441743  | 37.56 | sp Q8IVT2 MISP_HUMAN.ALS[Pho]SDSILSPAPDAR.+2y8.light          | 40.3 |
| 790.37181  | 713.357679  | 37.56 | sp Q8IVT2 MISP_HUMAN.ALS[Pho]SDSILSPAPDAR.+2y7.light          | 40.3 |
| 790.37181  | 626.32565   | 37.56 | sp Q8IVT2 MISP_HUMAN.ALS[Pho]SDSILSPAPDAR.+2y6.light          | 40.3 |
| 790.37181  | 458.235772  | 37.56 | sp Q8IVT2 MISP_HUMAN.ALS[Pho]SDSILSPAPDAR.+2y4.light          | 40.3 |
| 795.375944 | 1036.566104 | 37.56 | sp Q8IVT2 MISP_HUMAN.ALS[Pho]SDSILSPAPDAR.+2y10.heavy         | 40.3 |
| 795.375944 | 836.450012  | 37.56 | sp Q8IVT2 MISP_HUMAN.ALS[Pho]SDSILSPAPDAR.+2y8.heavy          | 40.3 |
| 795.375944 | 723.365948  | 37.56 | sp Q8IVT2 MISP_HUMAN.ALS[Pho]SDSILSPAPDAR.+2y7.heavy          | 40.3 |
| 795.375944 | 636.333919  | 37.56 | sp Q8IVT2 MISP_HUMAN.ALS[Pho]SDSILSPAPDAR.+2y6.heavy          | 40.3 |
| 795.375944 | 468.244041  | 37.56 | sp Q8IVT2 MISP_HUMAN.ALS[Pho]SDSILSPAPDAR.+2y4.heavy          | 40.3 |
| 553.933192 | 764.389707  | 32.99 | sp O60825 F262_HUMAN.RNS[Pho]FTPLSSSNTIR.+3y7.light           | 28.8 |
| 553.933192 | 677.357679  | 32.99 | sp O60825 F262_HUMAN.RNS[Pho]FTPLSSSNTIR.+3y6.light           | 28.8 |
| 553.933192 | 590.32565   | 32.99 | sp O60825 F262_HUMAN.RNS[Pho]FTPLSSSNTIR.+3y5.light           | 28.8 |
| 553.933192 | 487.766905  | 32.99 | sp O60825 F262_HUMAN.RNS[Pho]FTPLSSSNTIR.+3y9+2.light         | 28.8 |
| 553.933192 | 686.265766  | 32.99 | sp O60825 F262_HUMAN.RNS[Pho]FTPLSSSNTIR.+3b5.light           | 28.8 |
| 557.269282 | 774.397976  | 32.99 | sp O60825 F262_HUMAN.RNS[Pho]FTPLSSSNTIR.+3y7.heavy           | 28.8 |
| 557.269282 | 687.365948  | 32.99 | sp O60825 F262_HUMAN.RNS[Pho]FTPLSSSNTIR.+3y6.heavy           | 28.8 |
| 557.269282 | 600.333919  | 32.99 | sp O60825 F262_HUMAN.RNS[Pho]FTPLSSSNTIR.+3y5.heavy           | 28.8 |
| 557.269282 | 492.77104   | 32.99 | sp O60825 F262_HUMAN.RNS[Pho]FTPLSSSNTIR.+3y9+2.heavy         | 28.8 |
| 557.269282 | 686.265766  | 32.99 | sp O60825 F262_HUMAN.RNS[Pho]FTPLSSSNTIR.+3b5.heavy           | 28.8 |
| 566.273326 | 670.340632  | 22.46 | sp P27708 PYR1_HUMAN.IHRAS[Pho]DPGLPAEEPK.+3y6.light          | 29.4 |
| 566.273326 | 335.673954  | 22.46 | sp P27708 PYR1_HUMAN.IHRAS[Pho]DPGLPAEEPK.+3y6+2.light        | 29.4 |
| 566.273326 | 380.660528  | 22.46 | sp P27708 PYR1_HUMAN.IHRAS[Pho]DPGLPAEEPK.+3b6+2.light        | 29.4 |
| 566.273326 | 457.697641  | 22.46 | sp P27708 PYR1_HUMAN.IHRAS[Pho]DPGLPAEEPK.+3b8+2.light        | 29.4 |
| 566.273326 | 514.239673  | 22.46 | sp P27708 PYR1_HUMAN.IHRAS[Pho]DPGLPAEEPK.+3b9+2.light        | 29.4 |
| 568.944726 | 678.354831  | 22.46 | sp P27708 PYR1_HUMAN.IHRAS[Pho]DPGLPAEEPK.+3y6.heavy          | 29.4 |
| 568.944726 | 339.681053  | 22.46 | sp P27708 PYR1_HUMAN.IHRAS[Pho]DPGLPAEEPK.+3y6+2.heavy        | 29.4 |
| 568.944726 | 380.660528  | 22.46 | sp P27708 PYR1_HUMAN.IHRAS[Pho]DPGLPAEEPK.+3b6+2.heavy        | 29.4 |
| 568.944726 | 457.697641  | 22.46 | sp P27708 PYR1_HUMAN.IHRAS[Pho]DPGLPAEEPK.+3b8+2.heavy        | 29.4 |
| 568.944726 | 514.239673  | 22.46 | sp P27708 PYR1_HUMAN.IHRAS[Pho]DPGLPAEEPK.+3b9+2.heavy        | 29.4 |
| 724.975852 | 784.431178  | 49.5  | sp Q15418 KS6A1_HUMAN.AYS[Pho]FC[CAM]GTVEYMAPEVVNR.+3y7.light | 37.5 |
| 724.975852 | 713.394064  | 49.5  | sp Q15418 KS6A1_HUMAN.AYS[Pho]FC[CAM]GTVEYMAPEVVNR.+3y6.light | 37.5 |
| 724.975852 | 616.3413    | 49.5  | sp Q15418 KS6A1_HUMAN.AYS[Pho]FC[CAM]GTVEYMAPEVVNR.+3y5.light | 37.5 |
| 724.975852 | 487.298707  | 49.5  | sp Q15418 KS6A1_HUMAN.AYS[Pho]FC[CAM]GTVEYMAPEVVNR.+3y4.light | 37.5 |
| 724.975852 | 388.230293  | 49.5  | sp Q15418 KS6A1_HUMAN.AYS[Pho]FC[CAM]GTVEYMAPEVVNR.+3y3.light | 37.5 |
| 728.311942 | 794.439447  | 49.5  | sp Q15418 KS6A1_HUMAN.AYS[Pho]FC[CAM]GTVEYMAPEVVNR.+3y7.heavy | 37.5 |
| 728.311942 | 723.402333  | 49.5  | sp Q15418 KS6A1_HUMAN.AYS[Pho]FC[CAM]GTVEYMAPEVVNR.+3y6.heavy | 37.5 |
| 728.311942 | 626.349569  | 49.5  | sp Q15418 KS6A1_HUMAN.AYS[Pho]FC[CAM]GTVEYMAPEVVNR.+3y5.heavy | 37.5 |
| 728.311942 | 497.306976  | 49.5  | sp Q15418 KS6A1_HUMAN.AYS[Pho]FC[CAM]GTVEYMAPEVVNR.+3y4.heavy | 37.5 |
| 728.311942 | 398.238562  | 49.5  | sp Q15418 KS6A1_HUMAN.AYS[Pho]FC[CAM]GTVEYMAPEVVNR.+3y3.heavy | 37.5 |
| 700.308678 | 845.472708  | 37.72 | sp Q9BVJ6 UT14A_HUMAN.DSGS[Pho]QEVLSSELR.+2y7.light           | 36.3 |
| 700.308678 | 716.430115  | 37.72 | sp Q9BVJ6 UT14A_HUMAN.DSGS[Pho]QEVLSSELR.+2y6.light           | 36.3 |
| 700.308678 | 617.361701  | 37.72 | sp Q9BVJ6 UT14A_HUMAN.DSGS[Pho]QEVLSSELR.+2y5.light           | 36.3 |
| 700.308678 | 504.277637  | 37.72 | sp Q9BVJ6 UT14A_HUMAN.DSGS[Pho]QEVLSSELR.+2y4.light           | 36.3 |
| 700.308678 | 642.795207  | 37.72 | sp Q9BVJ6 UT14A_HUMAN.DSGS[Pho]QEVLSSELR.+2y11+2.light        | 36.3 |
| 705.312813 | 855.480977  | 37.72 | sp Q9BVJ6 UT14A_HUMAN.DSGS[Pho]QEVLSSELR.+2y7.heavy           | 36.3 |
| 705.312813 | 726.438384  | 37.72 | sp Q9BVJ6 UT14A_HUMAN.DSGS[Pho]QEVLSSELR.+2y6.heavy           | 36.3 |
| 705.312813 | 627.36997   | 37.72 | sp Q9BVJ6 UT14A_HUMAN.DSGS[Pho]QEVLSSELR.+2y5.heavy           | 36.3 |
| 705.312813 | 514.285906  | 37.72 | sp Q9BVJ6 UT14A_HUMAN.DSGS[Pho]QEVLSSELR.+2y4.heavy           | 36.3 |
| 705.312813 | 647.799341  | 37.72 | sp Q9BVJ6 UT14A_HUMAN.DSGS[Pho]QEVLSSELR.+2y11+2.heavy        | 36.3 |
| 564.225571 | 846.40258   | 21.9  | sp Q13144 EI2BE_HUMAN.GGS[Pho]PQMDDIK.+2y7.light              | 30.3 |
| 564.225571 | 749.349816  | 21.9  | sp Q13144 EI2BE_HUMAN.GGS[Pho]PQMDDIK.+2y6.light              | 30.3 |
| 564.225571 | 621.291239  | 21.9  | sp Q13144 EI2BE_HUMAN.GGS[Pho]PQMDDIK.+2y5.light              | 30.3 |
| 564.225571 | 490.250754  | 21.9  | sp Q13144 EI2BE_HUMAN.GGS[Pho]PQMDDIK.+2y4.light              | 30.3 |
| 564.225571 | 423.704928  | 21.9  | sp Q13144 EI2BE_HUMAN.GGS[Pho]PQMDDIK.+2y7+2.light            | 30.3 |
| 568.232671 | 854.416779  | 21.9  | sp Q13144 EI2BE_HUMAN.GGS[Pho]PQMDDIK.+2y7.heavy              | 30.3 |
| 568.232671 | 757.364015  | 21.9  | sp Q13144 EI2BE_HUMAN.GGS[Pho]PQMDDIK.+2y6.heavy              | 30.3 |

|            |            |       |                                                              |      |
|------------|------------|-------|--------------------------------------------------------------|------|
| 568.232671 | 629.305438 | 21.9  | sp Q13144 EI2BE_HUMAN.GGS[Pho]PQMDDIK.+2y5.heavy             | 30.3 |
| 568.232671 | 498.264953 | 21.9  | sp Q13144 EI2BE_HUMAN.GGS[Pho]PQMDDIK.+2y4.heavy             | 30.3 |
| 568.232671 | 427.712027 | 21.9  | sp Q13144 EI2BE_HUMAN.GGS[Pho]PQMDDIK.+2y7+2.heavy           | 30.3 |
| 434.218493 | 594.28207  | 25.53 | sp Q8WXE1 ATRIP_HUMAN.LAAPSVSHVS[Pho]PR.+3y11+2.light        | 22.6 |
| 434.218493 | 558.763513 | 25.53 | sp Q8WXE1 ATRIP_HUMAN.LAAPSVSHVS[Pho]PR.+3y10+2.light        | 22.6 |
| 434.218493 | 523.244956 | 25.53 | sp Q8WXE1 ATRIP_HUMAN.LAAPSVSHVS[Pho]PR.+3y9+2.light         | 22.6 |
| 434.218493 | 474.718574 | 25.53 | sp Q8WXE1 ATRIP_HUMAN.LAAPSVSHVS[Pho]PR.+3y8+2.light         | 22.6 |
| 434.218493 | 563.768264 | 25.53 | sp Q8WXE1 ATRIP_HUMAN.LAAPSVSHVS[Pho]PR.+3b11+2.light        | 22.6 |
| 437.554583 | 599.286204 | 25.53 | sp Q8WXE1 ATRIP_HUMAN.LAAPSVSHVS[Pho]PR.+3y11+2.heavy        | 22.6 |
| 437.554583 | 563.767647 | 25.53 | sp Q8WXE1 ATRIP_HUMAN.LAAPSVSHVS[Pho]PR.+3y10+2.heavy        | 22.6 |
| 437.554583 | 528.24909  | 25.53 | sp Q8WXE1 ATRIP_HUMAN.LAAPSVSHVS[Pho]PR.+3y9+2.heavy         | 22.6 |
| 437.554583 | 479.722708 | 25.53 | sp Q8WXE1 ATRIP_HUMAN.LAAPSVSHVS[Pho]PR.+3y8+2.heavy         | 22.6 |
| 437.554583 | 563.768264 | 25.53 | sp Q8WXE1 ATRIP_HUMAN.LAAPSVSHVS[Pho]PR.+3b11+2.heavy        | 22.6 |
| 661.599439 | 881.399937 | 47.74 | sp Q92878 RAD50_HUMAN.LFDVC[CAM]GS[Pho]QDFESDLDR.+3y7.light  | 34.2 |
| 661.599439 | 734.331523 | 47.74 | sp Q92878 RAD50_HUMAN.LFDVC[CAM]GS[Pho]QDFESDLDR.+3y6.light  | 34.2 |
| 661.599439 | 605.28893  | 47.74 | sp Q92878 RAD50_HUMAN.LFDVC[CAM]GS[Pho]QDFESDLDR.+3y5.light  | 34.2 |
| 661.599439 | 518.256902 | 47.74 | sp Q92878 RAD50_HUMAN.LFDVC[CAM]GS[Pho]QDFESDLDR.+3y4.light  | 34.2 |
| 661.599439 | 403.229959 | 47.74 | sp Q92878 RAD50_HUMAN.LFDVC[CAM]GS[Pho]QDFESDLDR.+3y3.light  | 34.2 |
| 664.935529 | 891.408206 | 47.74 | sp Q92878 RAD50_HUMAN.LFDVC[CAM]GS[Pho]QDFESDLDR.+3y7.heavy  | 34.2 |
| 664.935529 | 744.339792 | 47.74 | sp Q92878 RAD50_HUMAN.LFDVC[CAM]GS[Pho]QDFESDLDR.+3y6.heavy  | 34.2 |
| 664.935529 | 615.297199 | 47.74 | sp Q92878 RAD50_HUMAN.LFDVC[CAM]GS[Pho]QDFESDLDR.+3y5.heavy  | 34.2 |
| 664.935529 | 528.265171 | 47.74 | sp Q92878 RAD50_HUMAN.LFDVC[CAM]GS[Pho]QDFESDLDR.+3y4.heavy  | 34.2 |
| 664.935529 | 413.238228 | 47.74 | sp Q92878 RAD50_HUMAN.LFDVC[CAM]GS[Pho]QDFESDLDR.+3y3.heavy  | 34.2 |
| 516.723522 | 919.355704 | 19.6  | sp Q96B36 AKTS1_HUMAN.LNTS[Pho]DFQK.+2y7.light               | 28.2 |
| 516.723522 | 704.265098 | 19.6  | sp Q96B36 AKTS1_HUMAN.LNTS[Pho]DFQK.+2y5.light               | 28.2 |
| 516.723522 | 537.266738 | 19.6  | sp Q96B36 AKTS1_HUMAN.LNTS[Pho]DFQK.+2y4.light               | 28.2 |
| 516.723522 | 422.239795 | 19.6  | sp Q96B36 AKTS1_HUMAN.LNTS[Pho]DFQK.+2y3.light               | 28.2 |
| 516.723522 | 329.181946 | 19.6  | sp Q96B36 AKTS1_HUMAN.LNTS[Pho]DFQK.+2b3.light               | 28.2 |
| 520.730621 | 927.369903 | 19.6  | sp Q96B36 AKTS1_HUMAN.LNTS[Pho]DFQK.+2y7.heavy               | 28.2 |
| 520.730621 | 712.279297 | 19.6  | sp Q96B36 AKTS1_HUMAN.LNTS[Pho]DFQK.+2y5.heavy               | 28.2 |
| 520.730621 | 545.280937 | 19.6  | sp Q96B36 AKTS1_HUMAN.LNTS[Pho]DFQK.+2y4.heavy               | 28.2 |
| 520.730621 | 430.253994 | 19.6  | sp Q96B36 AKTS1_HUMAN.LNTS[Pho]DFQK.+2y3.heavy               | 28.2 |
| 520.730621 | 329.181946 | 19.6  | sp Q96B36 AKTS1_HUMAN.LNTS[Pho]DFQK.+2b3.heavy               | 28.2 |
| 733.297142 | 832.379536 | 21.43 | sp Q9UKV3 ACINU_HUMAN.LSEGS[Pho]QPAEEEEEDQETPSR.+3y7.light   | 37.9 |
| 733.297142 | 589.294016 | 21.43 | sp Q9UKV3 ACINU_HUMAN.LSEGS[Pho]QPAEEEEEDQETPSR.+3y5.light   | 37.9 |
| 733.297142 | 460.251423 | 21.43 | sp Q9UKV3 ACINU_HUMAN.LSEGS[Pho]QPAEEEEEDQETPSR.+3y4.light   | 37.9 |
| 733.297142 | 359.203744 | 21.43 | sp Q9UKV3 ACINU_HUMAN.LSEGS[Pho]QPAEEEEEDQETPSR.+3y3.light   | 37.9 |
| 733.297142 | 359.179935 | 21.43 | sp Q9UKV3 ACINU_HUMAN.LSEGS[Pho]QPAEEEEEDQETPSR.+3y6+2.light | 37.9 |
| 736.633231 | 842.387805 | 21.43 | sp Q9UKV3 ACINU_HUMAN.LSEGS[Pho]QPAEEEEEDQETPSR.+3y7.heavy   | 37.9 |
| 736.633231 | 599.302285 | 21.43 | sp Q9UKV3 ACINU_HUMAN.LSEGS[Pho]QPAEEEEEDQETPSR.+3y5.heavy   | 37.9 |
| 736.633231 | 470.259692 | 21.43 | sp Q9UKV3 ACINU_HUMAN.LSEGS[Pho]QPAEEEEEDQETPSR.+3y4.heavy   | 37.9 |
| 736.633231 | 369.212013 | 21.43 | sp Q9UKV3 ACINU_HUMAN.LSEGS[Pho]QPAEEEEEDQETPSR.+3y3.heavy   | 37.9 |
| 736.633231 | 364.184069 | 21.43 | sp Q9UKV3 ACINU_HUMAN.LSEGS[Pho]QPAEEEEEDQETPSR.+3y6+2.heavy | 37.9 |
| 771.6968   | 955.44795  | 36.57 | sp Q14980 NUMA1_HUMAN.LSQLEEHL[Pho]QLQDNPPQEK.+3y8.light     | 39.9 |
| 771.6968   | 827.389373 | 36.57 | sp Q14980 NUMA1_HUMAN.LSQLEEHL[Pho]QLQDNPPQEK.+3y7.light     | 39.9 |
| 771.6968   | 712.36243  | 36.57 | sp Q14980 NUMA1_HUMAN.LSQLEEHL[Pho]QLQDNPPQEK.+3y6.light     | 39.9 |
| 771.6968   | 598.319502 | 36.57 | sp Q14980 NUMA1_HUMAN.LSQLEEHL[Pho]QLQDNPPQEK.+3y5.light     | 39.9 |
| 771.6968   | 501.266738 | 36.57 | sp Q14980 NUMA1_HUMAN.LSQLEEHL[Pho]QLQDNPPQEK.+3y4.light     | 39.9 |
| 774.368199 | 963.462149 | 36.57 | sp Q14980 NUMA1_HUMAN.LSQLEEHL[Pho]QLQDNPPQEK.+3y8.heavy     | 39.9 |
| 774.368199 | 835.403572 | 36.57 | sp Q14980 NUMA1_HUMAN.LSQLEEHL[Pho]QLQDNPPQEK.+3y7.heavy     | 39.9 |
| 774.368199 | 720.376629 | 36.57 | sp Q14980 NUMA1_HUMAN.LSQLEEHL[Pho]QLQDNPPQEK.+3y6.heavy     | 39.9 |
| 774.368199 | 606.333701 | 36.57 | sp Q14980 NUMA1_HUMAN.LSQLEEHL[Pho]QLQDNPPQEK.+3y5.heavy     | 39.9 |
| 774.368199 | 509.280937 | 36.57 | sp Q14980 NUMA1_HUMAN.LSQLEEHL[Pho]QLQDNPPQEK.+3y4.heavy     | 39.9 |
| 601.249578 | 848.429463 | 31.32 | sp Q13263 TIF1B_HUMAN.S[Pho]GEGEVSGLMR.+2y8.light            | 32   |
| 601.249578 | 791.408    | 31.32 | sp Q13263 TIF1B_HUMAN.S[Pho]GEGEVSGLMR.+2y7.light            | 32   |
| 601.249578 | 662.365407 | 31.32 | sp Q13263 TIF1B_HUMAN.S[Pho]GEGEVSGLMR.+2y6.light            | 32   |
| 601.249578 | 563.296993 | 31.32 | sp Q13263 TIF1B_HUMAN.S[Pho]GEGEVSGLMR.+2y5.light            | 32   |



|             |             |       |                                                                    |      |
|-------------|-------------|-------|--------------------------------------------------------------------|------|
| 601.249578  | 354.069692  | 31.32 | sp Q13263 TIF1B_HUMAN.S[Pho]GEGEVSLMR.+2b3.light                   | 32   |
| 606.253712  | 858.437732  | 31.32 | sp Q13263 TIF1B_HUMAN.S[Pho]GEGEVSLMR.+2y8.heavy                   | 32   |
| 606.253712  | 801.416269  | 31.32 | sp Q13263 TIF1B_HUMAN.S[Pho]GEGEVSLMR.+2y7.heavy                   | 32   |
| 606.253712  | 672.373676  | 31.32 | sp Q13263 TIF1B_HUMAN.S[Pho]GEGEVSLMR.+2y6.heavy                   | 32   |
| 606.253712  | 573.305262  | 31.32 | sp Q13263 TIF1B_HUMAN.S[Pho]GEGEVSLMR.+2y5.heavy                   | 32   |
| 606.253712  | 354.069692  | 31.32 | sp Q13263 TIF1B_HUMAN.S[Pho]GEGEVSLMR.+2b3.heavy                   | 32   |
| 1010.810383 | 643.268195  | 52.7  | sp Q13263 TIF1B_HUMAN.FSAVLVEPPPMSLPGAGLSS[Pho]QELSGGPGDGP.+3y8.li | 52.1 |
| 1010.810383 | 499.214703  | 52.7  | sp Q13263 TIF1B_HUMAN.FSAVLVEPPPMSLPGAGLSS[Pho]QELSGGPGDGP.+3y6.li | 52.1 |
| 1010.810383 | 442.193239  | 52.7  | sp Q13263 TIF1B_HUMAN.FSAVLVEPPPMSLPGAGLSS[Pho]QELSGGPGDGP.+3y5.li | 52.1 |
| 1010.810383 | 518.29731   | 52.7  | sp Q13263 TIF1B_HUMAN.FSAVLVEPPPMSLPGAGLSS[Pho]QELSGGPGDGP.+3b5.li | 52.1 |
| 1010.810383 | 746.408317  | 52.7  | sp Q13263 TIF1B_HUMAN.FSAVLVEPPPMSLPGAGLSS[Pho]QELSGGPGDGP.+3b7.li | 52.1 |
| 1014.152792 | 643.268195  | 52.7  | sp Q13263 TIF1B_HUMAN.FSAVLVEPPPMSLPGAGLSS[Pho]QELSGGPGDGP.+3y8.f  | 52.1 |
| 1014.152792 | 499.214703  | 52.7  | sp Q13263 TIF1B_HUMAN.FSAVLVEPPPMSLPGAGLSS[Pho]QELSGGPGDGP.+3y6.f  | 52.1 |
| 1014.152792 | 442.193239  | 52.7  | sp Q13263 TIF1B_HUMAN.FSAVLVEPPPMSLPGAGLSS[Pho]QELSGGPGDGP.+3y5.f  | 52.1 |
| 1014.152792 | 528.324538  | 52.7  | sp Q13263 TIF1B_HUMAN.FSAVLVEPPPMSLPGAGLSS[Pho]QELSGGPGDGP.+3b5.f  | 52.1 |
| 1014.152792 | 756.435545  | 52.7  | sp Q13263 TIF1B_HUMAN.FSAVLVEPPPMSLPGAGLSS[Pho]QELSGGPGDGP.+3b7.f  | 52.1 |
| 856.000948  | 835.390435  | 25.8  | e.GTMDDISQEEGSS[Pho]QGEDSVSGSQR.+3y8.light                         | 44.2 |
| 856.000948  | 720.363492  | 25.8  | e.GTMDDISQEEGSS[Pho]QGEDSVSGSQR.+3y7.light                         | 44.2 |
| 856.000948  | 534.26305   | 25.8  | e.GTMDDISQEEGSS[Pho]QGEDSVSGSQR.+3y5.light                         | 44.2 |
| 856.000948  | 447.231021  | 25.8  | e.GTMDDISQEEGSS[Pho]QGEDSVSGSQR.+3y4.light                         | 44.2 |
| 856.000948  | 720.286881  | 25.8  | e.GTMDDISQEEGSS[Pho]QGEDSVSGSQR.+3b7.light                         | 44.2 |
| 859.337037  | 845.398704  | 25.8  | e.GTMDDISQEEGSS[Pho]QGEDSVSGSQR.+3y8.heavy                         | 44.2 |
| 859.337037  | 730.371761  | 25.8  | e.GTMDDISQEEGSS[Pho]QGEDSVSGSQR.+3y7.heavy                         | 44.2 |
| 859.337037  | 544.271319  | 25.8  | e.GTMDDISQEEGSS[Pho]QGEDSVSGSQR.+3y5.heavy                         | 44.2 |
| 859.337037  | 457.23929   | 25.8  | e.GTMDDISQEEGSS[Pho]QGEDSVSGSQR.+3y4.heavy                         | 44.2 |
| 859.337037  | 720.286881  | 25.8  | e.GTMDDISQEEGSS[Pho]QGEDSVSGSQR.+3b7.heavy                         | 44.2 |
| 651.789924  | 1074.486718 | 24.91 | sp O95453 PARN_HUMAN.NNS[Pho]FTAPSTVGK.+2y10.light                 | 34.2 |
| 651.789924  | 907.488358  | 24.91 | sp O95453 PARN_HUMAN.NNS[Pho]FTAPSTVGK.+2y9.light                  | 34.2 |
| 651.789924  | 760.419945  | 24.91 | sp O95453 PARN_HUMAN.NNS[Pho]FTAPSTVGK.+2y8.light                  | 34.2 |
| 651.789924  | 659.372266  | 24.91 | sp O95453 PARN_HUMAN.NNS[Pho]FTAPSTVGK.+2y7.light                  | 34.2 |
| 651.789924  | 588.335152  | 24.91 | sp O95453 PARN_HUMAN.NNS[Pho]FTAPSTVGK.+2y6.light                  | 34.2 |
| 655.797024  | 1082.500917 | 24.91 | sp O95453 PARN_HUMAN.NNS[Pho]FTAPSTVGK.+2y10.heavy                 | 34.2 |
| 655.797024  | 915.502558  | 24.91 | sp O95453 PARN_HUMAN.NNS[Pho]FTAPSTVGK.+2y9.heavy                  | 34.2 |
| 655.797024  | 768.434144  | 24.91 | sp O95453 PARN_HUMAN.NNS[Pho]FTAPSTVGK.+2y8.heavy                  | 34.2 |
| 655.797024  | 667.386465  | 24.91 | sp O95453 PARN_HUMAN.NNS[Pho]FTAPSTVGK.+2y7.heavy                  | 34.2 |
| 655.797024  | 596.349351  | 24.91 | sp O95453 PARN_HUMAN.NNS[Pho]FTAPSTVGK.+2y6.heavy                  | 34.2 |
| 497.73389   | 643.340966  | 23.71 | sp P17535 JUND_HUMAN.LAS[Pho]PELER.+2y5.light                      | 27.4 |
| 497.73389   | 417.245609  | 23.71 | sp P17535 JUND_HUMAN.LAS[Pho]PELER.+2y3.light                      | 27.4 |
| 497.73389   | 322.174121  | 23.71 | sp P17535 JUND_HUMAN.LAS[Pho]PELER.+2y5+2.light                    | 27.4 |
| 497.73389   | 352.126813  | 23.71 | sp P17535 JUND_HUMAN.LAS[Pho]PELER.+2b3.light                      | 27.4 |
| 502.738024  | 653.349235  | 23.71 | sp P17535 JUND_HUMAN.LAS[Pho]PELER.+2y5.heavy                      | 27.4 |
| 502.738024  | 427.253878  | 23.71 | sp P17535 JUND_HUMAN.LAS[Pho]PELER.+2y3.heavy                      | 27.4 |
| 502.738024  | 327.178255  | 23.71 | sp P17535 JUND_HUMAN.LAS[Pho]PELER.+2y5+2.heavy                    | 27.4 |
| 502.738024  | 352.126813  | 23.71 | sp P17535 JUND_HUMAN.LAS[Pho]PELER.+2b3.heavy                      | 27.4 |
| 602.753342  | 883.426821  | 13.61 | sp Q96EB6 SIR1_HUMAN.S[Pho]PGEPGGAAPER.+2y9.light                  | 32   |
| 602.753342  | 754.384228  | 13.61 | sp Q96EB6 SIR1_HUMAN.S[Pho]PGEPGGAAPER.+2y8.light                  | 32   |
| 602.753342  | 377.695752  | 13.61 | sp Q96EB6 SIR1_HUMAN.S[Pho]PGEPGGAAPER.+2y8+2.light                | 32   |
| 602.753342  | 451.122456  | 13.61 | sp Q96EB6 SIR1_HUMAN.S[Pho]PGEPGGAAPER.+2b4.light                  | 32   |
| 602.753342  | 451.176208  | 13.61 | sp Q96EB6 SIR1_HUMAN.S[Pho]PGEPGGAAPER.+2b10+2.light               | 32   |
| 607.757476  | 893.43509   | 13.61 | sp Q96EB6 SIR1_HUMAN.S[Pho]PGEPGGAAPER.+2y9.heavy                  | 32   |
| 607.757476  | 764.392497  | 13.61 | sp Q96EB6 SIR1_HUMAN.S[Pho]PGEPGGAAPER.+2y8.heavy                  | 32   |
| 607.757476  | 382.699886  | 13.61 | sp Q96EB6 SIR1_HUMAN.S[Pho]PGEPGGAAPER.+2y8+2.heavy                | 32   |
| 607.757476  | 451.122456  | 13.61 | sp Q96EB6 SIR1_HUMAN.S[Pho]PGEPGGAAPER.+2b4.heavy                  | 32   |
| 607.757476  | 451.176208  | 13.61 | sp Q96EB6 SIR1_HUMAN.S[Pho]PGEPGGAAPER.+2b10+2.heavy               | 32   |
| 809.329504  | 832.379536  | 23.17 | sp O15355 PPM1G_HUMAN.SGGGTGEEPGS[Pho]QGLNGEAGPEDSTR.+3y8.light    | 41.8 |
| 809.329504  | 761.342422  | 23.17 | sp O15355 PPM1G_HUMAN.SGGGTGEEPGS[Pho]QGLNGEAGPEDSTR.+3y7.light    | 41.8 |
| 809.329504  | 704.320959  | 23.17 | sp O15355 PPM1G_HUMAN.SGGGTGEEPGS[Pho]QGLNGEAGPEDSTR.+3y6.light    | 41.8 |

|            |             |       |                                                                  |      |
|------------|-------------|-------|------------------------------------------------------------------|------|
| 809.329504 | 876.365244  | 23.17 | sp O15355 PPM1G_HUMAN.SGGGTGEEPGS[Pho]QGLNGEAGPEDSTR.+3y17+2.lig | 41.8 |
| 809.329504 | 352.664117  | 23.17 | sp O15355 PPM1G_HUMAN.SGGGTGEEPGS[Pho]QGLNGEAGPEDSTR.+3y6+2.ligh | 41.8 |
| 812.665594 | 842.387805  | 23.17 | sp O15355 PPM1G_HUMAN.SGGGTGEEPGS[Pho]QGLNGEAGPEDSTR.+3y8.heavy  | 41.8 |
| 812.665594 | 771.350692  | 23.17 | sp O15355 PPM1G_HUMAN.SGGGTGEEPGS[Pho]QGLNGEAGPEDSTR.+3y7.heavy  | 41.8 |
| 812.665594 | 714.329228  | 23.17 | sp O15355 PPM1G_HUMAN.SGGGTGEEPGS[Pho]QGLNGEAGPEDSTR.+3y6.heavy  | 41.8 |
| 812.665594 | 881.369379  | 23.17 | sp O15355 PPM1G_HUMAN.SGGGTGEEPGS[Pho]QGLNGEAGPEDSTR.+3y17+2.he  | 41.8 |
| 812.665594 | 357.668252  | 23.17 | sp O15355 PPM1G_HUMAN.SGGGTGEEPGS[Pho]QGLNGEAGPEDSTR.+3y6+2.he   | 41.8 |
| 694.315585 | 864.467289  | 41.23 | sp Q13315 ATM_HUMAN.SLAFEEGS[Pho]QSTTISSLSEK.+3y8.light          | 35.9 |
| 694.315585 | 763.41961   | 41.23 | sp Q13315 ATM_HUMAN.SLAFEEGS[Pho]QSTTISSLSEK.+3y7.light          | 35.9 |
| 694.315585 | 650.335546  | 41.23 | sp Q13315 ATM_HUMAN.SLAFEEGS[Pho]QSTTISSLSEK.+3y6.light          | 35.9 |
| 694.315585 | 563.303518  | 41.23 | sp Q13315 ATM_HUMAN.SLAFEEGS[Pho]QSTTISSLSEK.+3y5.light          | 35.9 |
| 694.315585 | 363.187425  | 41.23 | sp Q13315 ATM_HUMAN.SLAFEEGS[Pho]QSTTISSLSEK.+3y3.light          | 35.9 |
| 696.986985 | 973.529166  | 41.23 | sp Q13315 ATM_HUMAN.SLAFEEGS[Pho]QSTTISSLSEK.+3y9.heavy          | 35.9 |
| 696.986985 | 771.433809  | 41.23 | sp Q13315 ATM_HUMAN.SLAFEEGS[Pho]QSTTISSLSEK.+3y7.heavy          | 35.9 |
| 696.986985 | 658.349745  | 41.23 | sp Q13315 ATM_HUMAN.SLAFEEGS[Pho]QSTTISSLSEK.+3y6.heavy          | 35.9 |
| 696.986985 | 571.317717  | 41.23 | sp Q13315 ATM_HUMAN.SLAFEEGS[Pho]QSTTISSLSEK.+3y5.heavy          | 35.9 |
| 696.986985 | 371.201624  | 41.23 | sp Q13315 ATM_HUMAN.SLAFEEGS[Pho]QSTTISSLSEK.+3y3.heavy          | 35.9 |
| 680.792664 | 851.425758  | 37.3  | sp Q13315 ATM_HUMAN.NLS[Pho]DIDQSFNK.+2y7.light                  | 35.5 |
| 680.792664 | 738.341694  | 37.3  | sp Q13315 ATM_HUMAN.NLS[Pho]DIDQSFNK.+2y6.light                  | 35.5 |
| 680.792664 | 623.314751  | 37.3  | sp Q13315 ATM_HUMAN.NLS[Pho]DIDQSFNK.+2y5.light                  | 35.5 |
| 680.792664 | 495.256174  | 37.3  | sp Q13315 ATM_HUMAN.NLS[Pho]DIDQSFNK.+2y4.light                  | 35.5 |
| 680.792664 | 408.224145  | 37.3  | sp Q13315 ATM_HUMAN.NLS[Pho]DIDQSFNK.+2y3.light                  | 35.5 |
| 684.799764 | 859.439957  | 37.3  | sp Q13315 ATM_HUMAN.NLS[Pho]DIDQSFNK.+2y7.heavy                  | 35.5 |
| 684.799764 | 746.355893  | 37.3  | sp Q13315 ATM_HUMAN.NLS[Pho]DIDQSFNK.+2y6.heavy                  | 35.5 |
| 684.799764 | 631.32895   | 37.3  | sp Q13315 ATM_HUMAN.NLS[Pho]DIDQSFNK.+2y5.heavy                  | 35.5 |
| 684.799764 | 503.270373  | 37.3  | sp Q13315 ATM_HUMAN.NLS[Pho]DIDQSFNK.+2y4.heavy                  | 35.5 |
| 684.799764 | 416.238344  | 37.3  | sp Q13315 ATM_HUMAN.NLS[Pho]DIDQSFNK.+2y3.heavy                  | 35.5 |
| 770.855796 | 942.371688  | 31.1  | sp Q6PKG0 LARP1_HUMAN.SLPTTVPEP[Pho]PNYR.+2y7.light              | 39.4 |
| 770.855796 | 549.277972  | 31.1  | sp Q6PKG0 LARP1_HUMAN.SLPTTVPEP[Pho]PNYR.+2y4.light              | 39.4 |
| 770.855796 | 670.797749  | 31.1  | sp Q6PKG0 LARP1_HUMAN.SLPTTVPEP[Pho]PNYR.+2y11+2.light           | 39.4 |
| 770.855796 | 399.223811  | 31.1  | sp Q6PKG0 LARP1_HUMAN.SLPTTVPEP[Pho]PNYR.+2b4.light              | 39.4 |
| 770.855796 | 599.339903  | 31.1  | sp Q6PKG0 LARP1_HUMAN.SLPTTVPEP[Pho]PNYR.+2b6.light              | 39.4 |
| 775.85993  | 952.379957  | 31.1  | sp Q6PKG0 LARP1_HUMAN.SLPTTVPEP[Pho]PNYR.+2y7.heavy              | 39.4 |
| 775.85993  | 559.286241  | 31.1  | sp Q6PKG0 LARP1_HUMAN.SLPTTVPEP[Pho]PNYR.+2y4.heavy              | 39.4 |
| 775.85993  | 675.801884  | 31.1  | sp Q6PKG0 LARP1_HUMAN.SLPTTVPEP[Pho]PNYR.+2y11+2.heavy           | 39.4 |
| 775.85993  | 399.223811  | 31.1  | sp Q6PKG0 LARP1_HUMAN.SLPTTVPEP[Pho]PNYR.+2b4.heavy              | 39.4 |
| 775.85993  | 300.17359   | 31.1  | sp Q6PKG0 LARP1_HUMAN.SLPTTVPEP[Pho]PNYR.+2b6+2.heavy            | 39.4 |
| 828.742521 | 1054.589135 | 51.52 | sp P15056 BRAF_HUMAN.SSS[Pho]APNVHINTIEPVNIDDLIR.+3y9.light      | 42.8 |
| 828.742521 | 858.467957  | 51.52 | sp P15056 BRAF_HUMAN.SSS[Pho]APNVHINTIEPVNIDDLIR.+3y7.light      | 42.8 |
| 828.742521 | 631.340966  | 51.52 | sp P15056 BRAF_HUMAN.SSS[Pho]APNVHINTIEPVNIDDLIR.+3y5.light      | 42.8 |
| 828.742521 | 516.314023  | 51.52 | sp P15056 BRAF_HUMAN.SSS[Pho]APNVHINTIEPVNIDDLIR.+3y4.light      | 42.8 |
| 828.742521 | 527.798206  | 51.52 | sp P15056 BRAF_HUMAN.SSS[Pho]APNVHINTIEPVNIDDLIR.+3y9+2.light    | 42.8 |
| 832.07861  | 1064.597404 | 51.52 | sp P15056 BRAF_HUMAN.SSS[Pho]APNVHINTIEPVNIDDLIR.+3y9.heavy      | 42.8 |
| 832.07861  | 868.476226  | 51.52 | sp P15056 BRAF_HUMAN.SSS[Pho]APNVHINTIEPVNIDDLIR.+3y7.heavy      | 42.8 |
| 832.07861  | 641.349235  | 51.52 | sp P15056 BRAF_HUMAN.SSS[Pho]APNVHINTIEPVNIDDLIR.+3y5.heavy      | 42.8 |
| 832.07861  | 526.322292  | 51.52 | sp P15056 BRAF_HUMAN.SSS[Pho]APNVHINTIEPVNIDDLIR.+3y4.heavy      | 42.8 |
| 832.07861  | 532.80234   | 51.52 | sp P15056 BRAF_HUMAN.SSS[Pho]APNVHINTIEPVNIDDLIR.+3y9+2.heavy    | 42.8 |
| 556.260803 | 923.434623  | 13.13 | sp P49815 TSC2_HUMAN.STS[Pho]LNERPK.+2y7.light                   | 30   |
| 556.260803 | 756.436263  | 13.13 | sp P49815 TSC2_HUMAN.STS[Pho]LNERPK.+2y6.light                   | 30   |
| 556.260803 | 643.352199  | 13.13 | sp P49815 TSC2_HUMAN.STS[Pho]LNERPK.+2y5.light                   | 30   |
| 556.260803 | 529.309272  | 13.13 | sp P49815 TSC2_HUMAN.STS[Pho]LNERPK.+2y4.light                   | 30   |
| 556.260803 | 400.266679  | 13.13 | sp P49815 TSC2_HUMAN.STS[Pho]LNERPK.+2y3.light                   | 30   |
| 560.267902 | 931.448822  | 13.13 | sp P49815 TSC2_HUMAN.STS[Pho]LNERPK.+2y7.heavy                   | 30   |
| 560.267902 | 764.450462  | 13.13 | sp P49815 TSC2_HUMAN.STS[Pho]LNERPK.+2y6.heavy                   | 30   |
| 560.267902 | 651.366398  | 13.13 | sp P49815 TSC2_HUMAN.STS[Pho]LNERPK.+2y5.heavy                   | 30   |
| 560.267902 | 537.323471  | 13.13 | sp P49815 TSC2_HUMAN.STS[Pho]LNERPK.+2y4.heavy                   | 30   |
| 560.267902 | 408.280878  | 13.13 | sp P49815 TSC2_HUMAN.STS[Pho]LNERPK.+2y3.heavy                   | 30   |

|            |             |       |                                                                |      |
|------------|-------------|-------|----------------------------------------------------------------|------|
| 798.996698 | 1004.391558 | 34.31 | sp P78527 PRKDC_HUMAN.LTPLPEDNS[Pho]MNVDQDGDPSDR.+3y9.light    | 41.2 |
| 798.996698 | 761.306037  | 34.31 | sp P78527 PRKDC_HUMAN.LTPLPEDNS[Pho]MNVDQDGDPSDR.+3y7.light    | 41.2 |
| 798.996698 | 646.279094  | 34.31 | sp P78527 PRKDC_HUMAN.LTPLPEDNS[Pho]MNVDQDGDPSDR.+3y6.light    | 41.2 |
| 798.996698 | 474.230687  | 34.31 | sp P78527 PRKDC_HUMAN.LTPLPEDNS[Pho]MNVDQDGDPSDR.+3y4.light    | 41.2 |
| 798.996698 | 761.30201   | 34.31 | sp P78527 PRKDC_HUMAN.LTPLPEDNS[Pho]MNVDQDGDPSDR.+3y20+3.light | 41.2 |
| 802.332787 | 1014.399827 | 34.31 | sp P78527 PRKDC_HUMAN.LTPLPEDNS[Pho]MNVDQDGDPSDR.+3y9.heavy    | 41.2 |
| 802.332787 | 771.314306  | 34.31 | sp P78527 PRKDC_HUMAN.LTPLPEDNS[Pho]MNVDQDGDPSDR.+3y7.heavy    | 41.2 |
| 802.332787 | 656.287363  | 34.31 | sp P78527 PRKDC_HUMAN.LTPLPEDNS[Pho]MNVDQDGDPSDR.+3y6.heavy    | 41.2 |
| 802.332787 | 484.238956  | 34.31 | sp P78527 PRKDC_HUMAN.LTPLPEDNS[Pho]MNVDQDGDPSDR.+3y4.heavy    | 41.2 |
| 802.332787 | 764.638099  | 34.31 | sp P78527 PRKDC_HUMAN.LTPLPEDNS[Pho]MNVDQDGDPSDR.+3y20+3.heavy | 41.2 |
| 751.338835 | 446.272158  | 41.65 | sp P27361 MK03_HUMAN.IADPEHDHTGFLTEY[Pho]VATR.+3y4.light       | 38.8 |
| 751.338835 | 976.930555  | 41.65 | sp P27361 MK03_HUMAN.IADPEHDHTGFLTEY[Pho]VATR.+3y16+2.light    | 38.8 |
| 751.338835 | 300.155397  | 41.65 | sp P27361 MK03_HUMAN.IADPEHDHTGFLTEY[Pho]VATR.+3b3.light       | 38.8 |
| 751.338835 | 537.235969  | 41.65 | sp P27361 MK03_HUMAN.IADPEHDHTGFLTEY[Pho]VATR.+3b10+2.light    | 38.8 |
| 751.338835 | 610.770176  | 41.65 | sp P27361 MK03_HUMAN.IADPEHDHTGFLTEY[Pho]VATR.+3b11+2.light    | 38.8 |
| 754.674925 | 456.280427  | 41.65 | sp P27361 MK03_HUMAN.IADPEHDHTGFLTEY[Pho]VATR.+3y4.heavy       | 38.8 |
| 754.674925 | 981.934689  | 41.65 | sp P27361 MK03_HUMAN.IADPEHDHTGFLTEY[Pho]VATR.+3y16+2.heavy    | 38.8 |
| 754.674925 | 300.155397  | 41.65 | sp P27361 MK03_HUMAN.IADPEHDHTGFLTEY[Pho]VATR.+3b3.heavy       | 38.8 |
| 754.674925 | 537.235969  | 41.65 | sp P27361 MK03_HUMAN.IADPEHDHTGFLTEY[Pho]VATR.+3b10+2.heavy    | 38.8 |
| 754.674925 | 610.770176  | 41.65 | sp P27361 MK03_HUMAN.IADPEHDHTGFLTEY[Pho]VATR.+3b11+2.heavy    | 38.8 |
| 563.577252 | 863.408     | 26.42 | sp P52564 MP2K6_HUMAN.T[Pho]IDAGC[CAM]KPYMAPER.+3y7.light      | 29.2 |
| 563.577252 | 754.355236  | 26.42 | sp P52564 MP2K6_HUMAN.T[Pho]IDAGC[CAM]KPYMAPER.+3y13+2.light   | 29.2 |
| 563.577252 | 697.813204  | 26.42 | sp P52564 MP2K6_HUMAN.T[Pho]IDAGC[CAM]KPYMAPER.+3y12+2.light   | 29.2 |
| 563.577252 | 640.299732  | 26.42 | sp P52564 MP2K6_HUMAN.T[Pho]IDAGC[CAM]KPYMAPER.+3y11+2.light   | 29.2 |
| 563.577252 | 604.781175  | 26.42 | sp P52564 MP2K6_HUMAN.T[Pho]IDAGC[CAM]KPYMAPER.+3y10+2.light   | 29.2 |
| 566.913342 | 873.416269  | 26.42 | sp P52564 MP2K6_HUMAN.T[Pho]IDAGC[CAM]KPYMAPER.+3y7.heavy      | 29.2 |
| 566.913342 | 759.35937   | 26.42 | sp P52564 MP2K6_HUMAN.T[Pho]IDAGC[CAM]KPYMAPER.+3y13+2.heavy   | 29.2 |
| 566.913342 | 702.817338  | 26.42 | sp P52564 MP2K6_HUMAN.T[Pho]IDAGC[CAM]KPYMAPER.+3y12+2.heavy   | 29.2 |
| 566.913342 | 645.303867  | 26.42 | sp P52564 MP2K6_HUMAN.T[Pho]IDAGC[CAM]KPYMAPER.+3y11+2.heavy   | 29.2 |
| 566.913342 | 609.78531   | 26.42 | sp P52564 MP2K6_HUMAN.T[Pho]IDAGC[CAM]KPYMAPER.+3y10+2.heavy   | 29.2 |
| 569.562726 | 863.408     | 25.29 | sp P46734 MP2K3_HUMAN.T[Pho]MDAGC[CAM]KPYMAPER.+3y7.light      | 29.5 |
| 569.562726 | 763.333446  | 25.29 | sp P46734 MP2K3_HUMAN.T[Pho]MDAGC[CAM]KPYMAPER.+3y13+2.light   | 29.5 |
| 569.562726 | 697.813204  | 25.29 | sp P46734 MP2K3_HUMAN.T[Pho]MDAGC[CAM]KPYMAPER.+3y12+2.light   | 29.5 |
| 569.562726 | 640.299732  | 25.29 | sp P46734 MP2K3_HUMAN.T[Pho]MDAGC[CAM]KPYMAPER.+3y11+2.light   | 29.5 |
| 569.562726 | 432.207638  | 25.29 | sp P46734 MP2K3_HUMAN.T[Pho]MDAGC[CAM]KPYMAPER.+3y7+2.light    | 29.5 |
| 572.898816 | 873.416269  | 25.29 | sp P46734 MP2K3_HUMAN.T[Pho]MDAGC[CAM]KPYMAPER.+3y7.heavy      | 29.5 |
| 572.898816 | 768.337581  | 25.29 | sp P46734 MP2K3_HUMAN.T[Pho]MDAGC[CAM]KPYMAPER.+3y13+2.heavy   | 29.5 |
| 572.898816 | 702.817338  | 25.29 | sp P46734 MP2K3_HUMAN.T[Pho]MDAGC[CAM]KPYMAPER.+3y12+2.heavy   | 29.5 |
| 572.898816 | 645.303867  | 25.29 | sp P46734 MP2K3_HUMAN.T[Pho]MDAGC[CAM]KPYMAPER.+3y11+2.heavy   | 29.5 |
| 572.898816 | 437.211772  | 25.29 | sp P46734 MP2K3_HUMAN.T[Pho]MDAGC[CAM]KPYMAPER.+3y7+2.heavy    | 29.5 |
| 525.55427  | 719.368243  | 19.37 | sp P35568 IRS1_HUMAN.HSS[Pho]ETFSSTPSATR.+3y7.light            | 27.3 |
| 525.55427  | 531.288536  | 19.37 | sp P35568 IRS1_HUMAN.HSS[Pho]ETFSSTPSATR.+3y5.light            | 27.3 |
| 525.55427  | 434.235772  | 19.37 | sp P35568 IRS1_HUMAN.HSS[Pho]ETFSSTPSATR.+3y4.light            | 27.3 |
| 525.55427  | 622.186847  | 19.37 | sp P35568 IRS1_HUMAN.HSS[Pho]ETFSSTPSATR.+3b5.light            | 27.3 |
| 525.55427  | 769.255261  | 19.37 | sp P35568 IRS1_HUMAN.HSS[Pho]ETFSSTPSATR.+3b6.light            | 27.3 |
| 528.890359 | 729.376512  | 19.37 | sp P35568 IRS1_HUMAN.HSS[Pho]ETFSSTPSATR.+3y7.heavy            | 27.3 |
| 528.890359 | 541.296805  | 19.37 | sp P35568 IRS1_HUMAN.HSS[Pho]ETFSSTPSATR.+3y5.heavy            | 27.3 |
| 528.890359 | 444.244041  | 19.37 | sp P35568 IRS1_HUMAN.HSS[Pho]ETFSSTPSATR.+3y4.heavy            | 27.3 |
| 528.890359 | 622.186847  | 19.37 | sp P35568 IRS1_HUMAN.HSS[Pho]ETFSSTPSATR.+3b5.heavy            | 27.3 |
| 528.890359 | 769.255261  | 19.37 | sp P35568 IRS1_HUMAN.HSS[Pho]ETFSSTPSATR.+3b6.heavy            | 27.3 |
| 827.33361  | 1199.549849 | 8.67  | sp P23588 IF4B_HUMAN.TGS[Pho]ESSQTGTSTSSR.+2y12.light          | 41.9 |
| 827.33361  | 897.427215  | 8.67  | sp P23588 IF4B_HUMAN.TGS[Pho]ESSQTGTSTSSR.+2y9.light           | 41.9 |
| 827.33361  | 796.379536  | 8.67  | sp P23588 IF4B_HUMAN.TGS[Pho]ESSQTGTSTSSR.+2y8.light           | 41.9 |
| 827.33361  | 638.310394  | 8.67  | sp P23588 IF4B_HUMAN.TGS[Pho]ESSQTGTSTSSR.+2y6.light           | 41.9 |
| 827.33361  | 551.278366  | 8.67  | sp P23588 IF4B_HUMAN.TGS[Pho]ESSQTGTSTSSR.+2y5.light           | 41.9 |
| 832.337745 | 1209.558118 | 8.67  | sp P23588 IF4B_HUMAN.TGS[Pho]ESSQTGTSTSSR.+2y12.heavy          | 41.9 |
| 832.337745 | 907.435484  | 8.67  | sp P23588 IF4B_HUMAN.TGS[Pho]ESSQTGTSTSSR.+2y9.heavy           | 41.9 |

|            |            |       |                                                                 |      |
|------------|------------|-------|-----------------------------------------------------------------|------|
| 832.337745 | 806.387805 | 8.67  | sp P23588 IF4B_HUMAN.TGS[Pho]ESSQTGTSTSSR.+2y8.heavy            | 41.9 |
| 832.337745 | 648.318663 | 8.67  | sp P23588 IF4B_HUMAN.TGS[Pho]ESSQTGTSTSSR.+2y6.heavy            | 41.9 |
| 832.337745 | 561.286635 | 8.67  | sp P23588 IF4B_HUMAN.TGS[Pho]ESSQTGTSTSSR.+2y5.heavy            | 41.9 |
| 550.2645   | 986.437659 | 37    | sp O96017 CHK2_HUMAN.ILGETS[Pho]LMR.+2y8.light                  | 29.7 |
| 550.2645   | 873.353595 | 37    | sp O96017 CHK2_HUMAN.ILGETS[Pho]LMR.+2y7.light                  | 29.7 |
| 550.2645   | 687.289538 | 37    | sp O96017 CHK2_HUMAN.ILGETS[Pho]LMR.+2y5.light                  | 29.7 |
| 550.2645   | 586.24186  | 37    | sp O96017 CHK2_HUMAN.ILGETS[Pho]LMR.+2y4.light                  | 29.7 |
| 550.2645   | 493.722468 | 37    | sp O96017 CHK2_HUMAN.ILGETS[Pho]LMR.+2y8+2.light                | 29.7 |
| 555.268634 | 996.445928 | 37    | sp O96017 CHK2_HUMAN.ILGETS[Pho]LMR.+2y8.heavy                  | 29.7 |
| 555.268634 | 883.361864 | 37    | sp O96017 CHK2_HUMAN.ILGETS[Pho]LMR.+2y7.heavy                  | 29.7 |
| 555.268634 | 697.297807 | 37    | sp O96017 CHK2_HUMAN.ILGETS[Pho]LMR.+2y5.heavy                  | 29.7 |
| 555.268634 | 596.250129 | 37    | sp O96017 CHK2_HUMAN.ILGETS[Pho]LMR.+2y4.heavy                  | 29.7 |
| 555.268634 | 498.726602 | 37    | sp O96017 CHK2_HUMAN.ILGETS[Pho]LMR.+2y8+2.heavy                | 29.7 |
| 568.918555 | 834.446828 | 33.48 | sp P35222 CTNB1_HUMAN.TS[Pho]MGGTQQQFVEGVR.+3y7.light           | 29.5 |
| 568.918555 | 706.38825  | 33.48 | sp P35222 CTNB1_HUMAN.TS[Pho]MGGTQQQFVEGVR.+3y6.light           | 29.5 |
| 568.918555 | 559.319837 | 33.48 | sp P35222 CTNB1_HUMAN.TS[Pho]MGGTQQQFVEGVR.+3y5.light           | 29.5 |
| 568.918555 | 460.251423 | 33.48 | sp P35222 CTNB1_HUMAN.TS[Pho]MGGTQQQFVEGVR.+3y4.light           | 29.5 |
| 568.918555 | 331.208829 | 33.48 | sp P35222 CTNB1_HUMAN.TS[Pho]MGGTQQQFVEGVR.+3y3.light           | 29.5 |
| 572.254644 | 844.455097 | 33.48 | sp P35222 CTNB1_HUMAN.TS[Pho]MGGTQQQFVEGVR.+3y7.heavy           | 29.5 |
| 572.254644 | 716.396519 | 33.48 | sp P35222 CTNB1_HUMAN.TS[Pho]MGGTQQQFVEGVR.+3y6.heavy           | 29.5 |
| 572.254644 | 569.328106 | 33.48 | sp P35222 CTNB1_HUMAN.TS[Pho]MGGTQQQFVEGVR.+3y5.heavy           | 29.5 |
| 572.254644 | 470.259692 | 33.48 | sp P35222 CTNB1_HUMAN.TS[Pho]MGGTQQQFVEGVR.+3y4.heavy           | 29.5 |
| 572.254644 | 341.217098 | 33.48 | sp P35222 CTNB1_HUMAN.TS[Pho]MGGTQQQFVEGVR.+3y3.heavy           | 29.5 |
| 891.911496 | 577.282782 | 31.52 | sp O60934 NBN_HUMAN.TTTPGPSLS[Pho]QGVSVDEK.+2y5.light           | 44.7 |
| 891.911496 | 391.18234  | 31.52 | sp O60934 NBN_HUMAN.TTTPGPSLS[Pho]QGVSVDEK.+2y3.light           | 44.7 |
| 891.911496 | 790.863818 | 31.52 | sp O60934 NBN_HUMAN.TTTPGPSLS[Pho]QGVSVDEK.+2y15+2.light        | 44.7 |
| 891.911496 | 740.339978 | 31.52 | sp O60934 NBN_HUMAN.TTTPGPSLS[Pho]QGVSVDEK.+2y14+2.light        | 44.7 |
| 891.911496 | 691.813597 | 31.52 | sp O60934 NBN_HUMAN.TTTPGPSLS[Pho]QGVSVDEK.+2y13+2.light        | 44.7 |
| 895.918596 | 585.296981 | 31.52 | sp O60934 NBN_HUMAN.TTTPGPSLS[Pho]QGVSVDEK.+2y5.heavy           | 44.7 |
| 895.918596 | 399.196539 | 31.52 | sp O60934 NBN_HUMAN.TTTPGPSLS[Pho]QGVSVDEK.+2y3.heavy           | 44.7 |
| 895.918596 | 794.870917 | 31.52 | sp O60934 NBN_HUMAN.TTTPGPSLS[Pho]QGVSVDEK.+2y15+2.heavy        | 44.7 |
| 895.918596 | 744.347078 | 31.52 | sp O60934 NBN_HUMAN.TTTPGPSLS[Pho]QGVSVDEK.+2y14+2.heavy        | 44.7 |
| 895.918596 | 695.820696 | 31.52 | sp O60934 NBN_HUMAN.TTTPGPSLS[Pho]QGVSVDEK.+2y13+2.heavy        | 44.7 |
| 632.96986  | 952.413553 | 29.72 | sp Q8N122 RPTOR_HUMAN.VLDTSSLTQSAPAS[Pho]PTNK.+3y9.light        | 32.8 |
| 632.96986  | 794.344411 | 29.72 | sp Q8N122 RPTOR_HUMAN.VLDTSSLTQSAPAS[Pho]PTNK.+3y7.light        | 32.8 |
| 632.96986  | 697.291647 | 29.72 | sp Q8N122 RPTOR_HUMAN.VLDTSSLTQSAPAS[Pho]PTNK.+3y6.light        | 32.8 |
| 632.96986  | 459.256174 | 29.72 | sp Q8N122 RPTOR_HUMAN.VLDTSSLTQSAPAS[Pho]PTNK.+3y4.light        | 32.8 |
| 632.96986  | 397.675843 | 29.72 | sp Q8N122 RPTOR_HUMAN.VLDTSSLTQSAPAS[Pho]PTNK.+3y7+2.light      | 32.8 |
| 635.64126  | 960.427752 | 29.72 | sp Q8N122 RPTOR_HUMAN.VLDTSSLTQSAPAS[Pho]PTNK.+3y9.heavy        | 32.8 |
| 635.64126  | 802.35861  | 29.72 | sp Q8N122 RPTOR_HUMAN.VLDTSSLTQSAPAS[Pho]PTNK.+3y7.heavy        | 32.8 |
| 635.64126  | 705.305846 | 29.72 | sp Q8N122 RPTOR_HUMAN.VLDTSSLTQSAPAS[Pho]PTNK.+3y6.heavy        | 32.8 |
| 635.64126  | 467.270373 | 29.72 | sp Q8N122 RPTOR_HUMAN.VLDTSSLTQSAPAS[Pho]PTNK.+3y4.heavy        | 32.8 |
| 635.64126  | 401.682943 | 29.72 | sp Q8N122 RPTOR_HUMAN.VLDTSSLTQSAPAS[Pho]PTNK.+3y7+2.heavy      | 32.8 |
| 659.625304 | 794.344411 | 28.12 | sp Q8N122 RPTOR_HUMAN.VLDTSSLTQS[Pho]APAS[Pho]PTNK.+3y7.light   | 34.1 |
| 659.625304 | 459.256174 | 28.12 | sp Q8N122 RPTOR_HUMAN.VLDTSSLTQS[Pho]APAS[Pho]PTNK.+3y4.light   | 34.1 |
| 659.625304 | 362.20341  | 28.12 | sp Q8N122 RPTOR_HUMAN.VLDTSSLTQS[Pho]APAS[Pho]PTNK.+3y3.light   | 34.1 |
| 659.625304 | 397.675843 | 28.12 | sp Q8N122 RPTOR_HUMAN.VLDTSSLTQS[Pho]APAS[Pho]PTNK.+3y7+2.light | 34.1 |
| 659.625304 | 349.149461 | 28.12 | sp Q8N122 RPTOR_HUMAN.VLDTSSLTQS[Pho]APAS[Pho]PTNK.+3y6+2.light | 34.1 |
| 662.296704 | 802.35861  | 28.12 | sp Q8N122 RPTOR_HUMAN.VLDTSSLTQS[Pho]APAS[Pho]PTNK.+3y7.heavy   | 34.1 |
| 662.296704 | 467.270373 | 28.12 | sp Q8N122 RPTOR_HUMAN.VLDTSSLTQS[Pho]APAS[Pho]PTNK.+3y4.heavy   | 34.1 |
| 662.296704 | 370.217609 | 28.12 | sp Q8N122 RPTOR_HUMAN.VLDTSSLTQS[Pho]APAS[Pho]PTNK.+3y3.heavy   | 34.1 |
| 662.296704 | 401.682943 | 28.12 | sp Q8N122 RPTOR_HUMAN.VLDTSSLTQS[Pho]APAS[Pho]PTNK.+3y7+2.heavy | 34.1 |
| 662.296704 | 353.156561 | 28.12 | sp Q8N122 RPTOR_HUMAN.VLDTSSLTQS[Pho]APAS[Pho]PTNK.+3y6+2.heavy | 34.1 |
| 563.250435 | 939.393152 | 15.87 | sp P46527 CDN1B_HUMAN.VSNGS[Pho]PSLER.+2y8.light                | 30.3 |
| 563.250435 | 825.350224 | 15.87 | sp P46527 CDN1B_HUMAN.VSNGS[Pho]PSLER.+2y7.light                | 30.3 |
| 563.250435 | 601.330401 | 15.87 | sp P46527 CDN1B_HUMAN.VSNGS[Pho]PSLER.+2y5.light                | 30.3 |
| 563.250435 | 417.245609 | 15.87 | sp P46527 CDN1B_HUMAN.VSNGS[Pho]PSLER.+2y3.light                | 30.3 |

|            |             |       |                                                         |      |
|------------|-------------|-------|---------------------------------------------------------|------|
| 563.250435 | 470.200214  | 15.87 | sp P46527 CDN1B_HUMAN.VSNGS[Pho]PSLER.+2y8+2.light      | 30.3 |
| 568.25457  | 949.401421  | 15.87 | sp P46527 CDN1B_HUMAN.VSNGS[Pho]PSLER.+2y8.heavy        | 30.3 |
| 568.25457  | 835.358493  | 15.87 | sp P46527 CDN1B_HUMAN.VSNGS[Pho]PSLER.+2y7.heavy        | 30.3 |
| 568.25457  | 611.33867   | 15.87 | sp P46527 CDN1B_HUMAN.VSNGS[Pho]PSLER.+2y5.heavy        | 30.3 |
| 568.25457  | 427.253878  | 15.87 | sp P46527 CDN1B_HUMAN.VSNGS[Pho]PSLER.+2y3.heavy        | 30.3 |
| 568.25457  | 475.204348  | 15.87 | sp P46527 CDN1B_HUMAN.VSNGS[Pho]PSLER.+2y8+2.heavy      | 30.3 |
| 526.262814 | 952.449938  | 20.89 | sp O00443 P3C2A_HUMAN.VSNLQVS[Pho]PK.+2y8.light         | 28.7 |
| 526.262814 | 865.41791   | 20.89 | sp O00443 P3C2A_HUMAN.VSNLQVS[Pho]PK.+2y7.light         | 28.7 |
| 526.262814 | 751.374983  | 20.89 | sp O00443 P3C2A_HUMAN.VSNLQVS[Pho]PK.+2y6.light         | 28.7 |
| 526.262814 | 411.163927  | 20.89 | sp O00443 P3C2A_HUMAN.VSNLQVS[Pho]PK.+2y3.light         | 28.7 |
| 526.262814 | 301.150646  | 20.89 | sp O00443 P3C2A_HUMAN.VSNLQVS[Pho]PK.+2b3.light         | 28.7 |
| 530.269914 | 960.464137  | 20.89 | sp O00443 P3C2A_HUMAN.VSNLQVS[Pho]PK.+2y8.heavy         | 28.7 |
| 530.269914 | 873.432109  | 20.89 | sp O00443 P3C2A_HUMAN.VSNLQVS[Pho]PK.+2y7.heavy         | 28.7 |
| 530.269914 | 759.389182  | 20.89 | sp O00443 P3C2A_HUMAN.VSNLQVS[Pho]PK.+2y6.heavy         | 28.7 |
| 530.269914 | 419.178126  | 20.89 | sp O00443 P3C2A_HUMAN.VSNLQVS[Pho]PK.+2y3.heavy         | 28.7 |
| 530.269914 | 301.150646  | 20.89 | sp O00443 P3C2A_HUMAN.VSNLQVS[Pho]PK.+2b3.heavy         | 28.7 |
| 633.294311 | 966.433226  | 27.81 | sp P06493 CDK1_HUMAN.IGEGT[Pho]YGVVYK.+2y8.light        | 33.4 |
| 633.294311 | 909.411762  | 27.81 | sp P06493 CDK1_HUMAN.IGEGT[Pho]YGVVYK.+2y7.light        | 33.4 |
| 633.294311 | 310.176132  | 27.81 | sp P06493 CDK1_HUMAN.IGEGT[Pho]YGVVYK.+2y2.light        | 33.4 |
| 633.294311 | 364.702514  | 27.81 | sp P06493 CDK1_HUMAN.IGEGT[Pho]YGVVYK.+2y6+2.light      | 33.4 |
| 633.294311 | 300.155397  | 27.81 | sp P06493 CDK1_HUMAN.IGEGT[Pho]YGVVYK.+2b3.light        | 33.4 |
| 637.301411 | 974.447425  | 27.81 | sp P06493 CDK1_HUMAN.IGEGT[Pho]YGVVYK.+2y8.heavy        | 33.4 |
| 637.301411 | 917.425961  | 27.81 | sp P06493 CDK1_HUMAN.IGEGT[Pho]YGVVYK.+2y7.heavy        | 33.4 |
| 637.301411 | 318.190331  | 27.81 | sp P06493 CDK1_HUMAN.IGEGT[Pho]YGVVYK.+2y2.heavy        | 33.4 |
| 637.301411 | 368.709614  | 27.81 | sp P06493 CDK1_HUMAN.IGEGT[Pho]YGVVYK.+2y6+2.heavy      | 33.4 |
| 637.301411 | 300.155397  | 27.81 | sp P06493 CDK1_HUMAN.IGEGT[Pho]YGVVYK.+2b3.heavy        | 33.4 |
| 558.223978 | 880.415922  | 22.04 | sp P29803 ODPAT_HUMAN.YHGHS[Pho]MSDPGVSYSR.+3y8.light   | 29   |
| 558.223978 | 678.35695   | 22.04 | sp P29803 ODPAT_HUMAN.YHGHS[Pho]MSDPGVSYSR.+3y6.light   | 29   |
| 558.223978 | 581.304186  | 22.04 | sp P29803 ODPAT_HUMAN.YHGHS[Pho]MSDPGVSYSR.+3y5.light   | 29   |
| 558.223978 | 339.682113  | 22.04 | sp P29803 ODPAT_HUMAN.YHGHS[Pho]MSDPGVSYSR.+3y6+2.light | 29   |
| 558.223978 | 498.157492  | 22.04 | sp P29803 ODPAT_HUMAN.YHGHS[Pho]MSDPGVSYSR.+3b8+2.light | 29   |
| 561.560068 | 890.424191  | 22.04 | sp P29803 ODPAT_HUMAN.YHGHS[Pho]MSDPGVSYSR.+3y8.heavy   | 29   |
| 561.560068 | 688.365219  | 22.04 | sp P29803 ODPAT_HUMAN.YHGHS[Pho]MSDPGVSYSR.+3y6.heavy   | 29   |
| 561.560068 | 591.312455  | 22.04 | sp P29803 ODPAT_HUMAN.YHGHS[Pho]MSDPGVSYSR.+3y5.heavy   | 29   |
| 561.560068 | 344.686248  | 22.04 | sp P29803 ODPAT_HUMAN.YHGHS[Pho]MSDPGVSYSR.+3y6+2.heavy | 29   |
| 561.560068 | 498.157492  | 22.04 | sp P29803 ODPAT_HUMAN.YHGHS[Pho]MSDPGVSYSR.+3b8+2.heavy | 29   |
| 753.329611 | 1024.494566 | 23.95 | sp O14757 CHK1_HUMAN.VTS[Pho]GGVSESPSGFSK.+2y10.light   | 38.6 |
| 753.329611 | 925.426152  | 23.95 | sp O14757 CHK1_HUMAN.VTS[Pho]GGVSESPSGFSK.+2y9.light    | 38.6 |
| 753.329611 | 838.394124  | 23.95 | sp O14757 CHK1_HUMAN.VTS[Pho]GGVSESPSGFSK.+2y8.light    | 38.6 |
| 753.329611 | 709.351531  | 23.95 | sp O14757 CHK1_HUMAN.VTS[Pho]GGVSESPSGFSK.+2y7.light    | 38.6 |
| 753.329611 | 622.319502  | 23.95 | sp O14757 CHK1_HUMAN.VTS[Pho]GGVSESPSGFSK.+2y6.light    | 38.6 |
| 757.33671  | 1032.508765 | 23.95 | sp O14757 CHK1_HUMAN.VTS[Pho]GGVSESPSGFSK.+2y10.heavy   | 38.6 |
| 757.33671  | 933.440351  | 23.95 | sp O14757 CHK1_HUMAN.VTS[Pho]GGVSESPSGFSK.+2y9.heavy    | 38.6 |
| 757.33671  | 846.408323  | 23.95 | sp O14757 CHK1_HUMAN.VTS[Pho]GGVSESPSGFSK.+2y8.heavy    | 38.6 |
| 757.33671  | 717.36573   | 23.95 | sp O14757 CHK1_HUMAN.VTS[Pho]GGVSESPSGFSK.+2y7.heavy    | 38.6 |
| 757.33671  | 630.333701  | 23.95 | sp O14757 CHK1_HUMAN.VTS[Pho]GGVSESPSGFSK.+2y6.heavy    | 38.6 |
| 565.729336 | 967.388066  | 12.61 | sp O14757 CHK1_HUMAN.YSSS[Pho]QPEPR.+2y8.light          | 30.4 |
| 565.729336 | 880.356038  | 12.61 | sp O14757 CHK1_HUMAN.YSSS[Pho]QPEPR.+2y7.light          | 30.4 |
| 565.729336 | 793.32401   | 12.61 | sp O14757 CHK1_HUMAN.YSSS[Pho]QPEPR.+2y6.light          | 30.4 |
| 565.729336 | 626.32565   | 12.61 | sp O14757 CHK1_HUMAN.YSSS[Pho]QPEPR.+2y5.light          | 30.4 |
| 565.729336 | 498.267073  | 12.61 | sp O14757 CHK1_HUMAN.YSSS[Pho]QPEPR.+2y4.light          | 30.4 |
| 570.73347  | 977.396335  | 12.61 | sp O14757 CHK1_HUMAN.YSSS[Pho]QPEPR.+2y8.heavy          | 30.4 |
| 570.73347  | 890.364307  | 12.61 | sp O14757 CHK1_HUMAN.YSSS[Pho]QPEPR.+2y7.heavy          | 30.4 |
| 570.73347  | 803.332279  | 12.61 | sp O14757 CHK1_HUMAN.YSSS[Pho]QPEPR.+2y6.heavy          | 30.4 |
| 570.73347  | 636.333919  | 12.61 | sp O14757 CHK1_HUMAN.YSSS[Pho]QPEPR.+2y5.heavy          | 30.4 |
| 570.73347  | 508.275342  | 12.61 | sp O14757 CHK1_HUMAN.YSSS[Pho]QPEPR.+2y4.heavy          | 30.4 |
| 533.741192 | 758.361384  | 25.6  | sp Q8NCD3 HJURP_HUMAN.LPSS[Pho]PLGC[CAM]R.+2y7-98.light | 29   |

|                   |            |      |                                                            |    |
|-------------------|------------|------|------------------------------------------------------------|----|
| <b>533.741192</b> | 602.307892 | 25.6 | sp Q8NCD3 HJURP_HUMAN.LPSS[Pho]PLGC[CAM]R.+2y5.light       | 29 |
| <b>533.741192</b> | 392.171064 | 25.6 | sp Q8NCD3 HJURP_HUMAN.LPSS[Pho]PLGC[CAM]R.+2y3.light       | 29 |
| <b>533.741192</b> | 477.19916  | 25.6 | sp Q8NCD3 HJURP_HUMAN.LPSS[Pho]PLGC[CAM]R.+2y8+2.light     | 29 |
| <b>533.741192</b> | 336.168316 | 25.6 | sp Q8NCD3 HJURP_HUMAN.LPSS[Pho]PLGC[CAM]R.+2y6 -98+2.light | 29 |
| <b>538.745326</b> | 768.369653 | 25.6 | sp Q8NCD3 HJURP_HUMAN.LPSS[Pho]PLGC[CAM]R.+2y7 -98.heavy   | 29 |
| <b>538.745326</b> | 612.316161 | 25.6 | sp Q8NCD3 HJURP_HUMAN.LPSS[Pho]PLGC[CAM]R.+2y5.heavy       | 29 |
| <b>538.745326</b> | 402.179333 | 25.6 | sp Q8NCD3 HJURP_HUMAN.LPSS[Pho]PLGC[CAM]R.+2y3.heavy       | 29 |
| <b>538.745326</b> | 482.203294 | 25.6 | sp Q8NCD3 HJURP_HUMAN.LPSS[Pho]PLGC[CAM]R.+2y8+2.heavy     | 29 |
| <b>538.745326</b> | 341.17245  | 25.6 | sp Q8NCD3 HJURP_HUMAN.LPSS[Pho]PLGC[CAM]R.+2y6 -98+2.heavy | 29 |
