# Supplementary material
Source: PubMed Central journal article supplement (PMC11071946)
Supplement: 18_2022_4634_MOESM4_ESM.pdf [file 18_2022_4634_MOESM4_ESM.pdf]

| <b>Cell line</b> | <b>EGFR-activating mutation</b> | <b>EGFR T790M mutation</b> | <b>Constitutive MET activation (pMET)</b> | <b>Responsiveness to EGFRi</b> | <b>Responsiveness to METi</b> |
|------------------|---------------------------------|----------------------------|-------------------------------------------|--------------------------------|-------------------------------|
| <b>HCC827</b>    | E746-A750 del                   | No                         | Yes                                       | Yes                            | No                            |
| <b>PC-9</b>      | E746-A750 del                   | No                         | No                                        | Yes                            | No                            |
| <b>H1975</b>     | L858R                           | Yes                        | No                                        | Yes (AZD9291)                  | No                            |
| <b>H1993</b>     | No (wt)                         | No                         | Yes                                       | No                             | Yes                           |
| <b>A549</b>      | No (wt)                         | No                         | Yes                                       | No                             | No                            |
| <b>EBC-1</b>     | No (wt)                         | No                         | Yes                                       | No                             | Yes                           |

**Supplementary Table 3.** Genomic background and treatment responsiveness of cell lines included in the EGFR-positive panel.
